# Supplementary material for: γ‐Non‐Symmetrically Dimasked TriPPPro Prodrugs as Potential Antiviral Agents against HIV
Source: PubMed Central journal article supplement — ChemMedChem. 2020 Nov 17;16(3):499–512. doi: 10.1002/cmdc.202000712 (PMC7894357; doi:10.1002/cmdc.202000712), 2020-11-17

# ChemMedChem

Supporting Information

## **$\gamma$ -Non-Symmetrically Dimasked TriPPPro Prodrugs as Potential Antiviral Agents against HIV**

Chenglong Zhao, Xiao Jia, Dominique Schols, Jan Balzarini, and Chris Meier\*

# Supporting Information

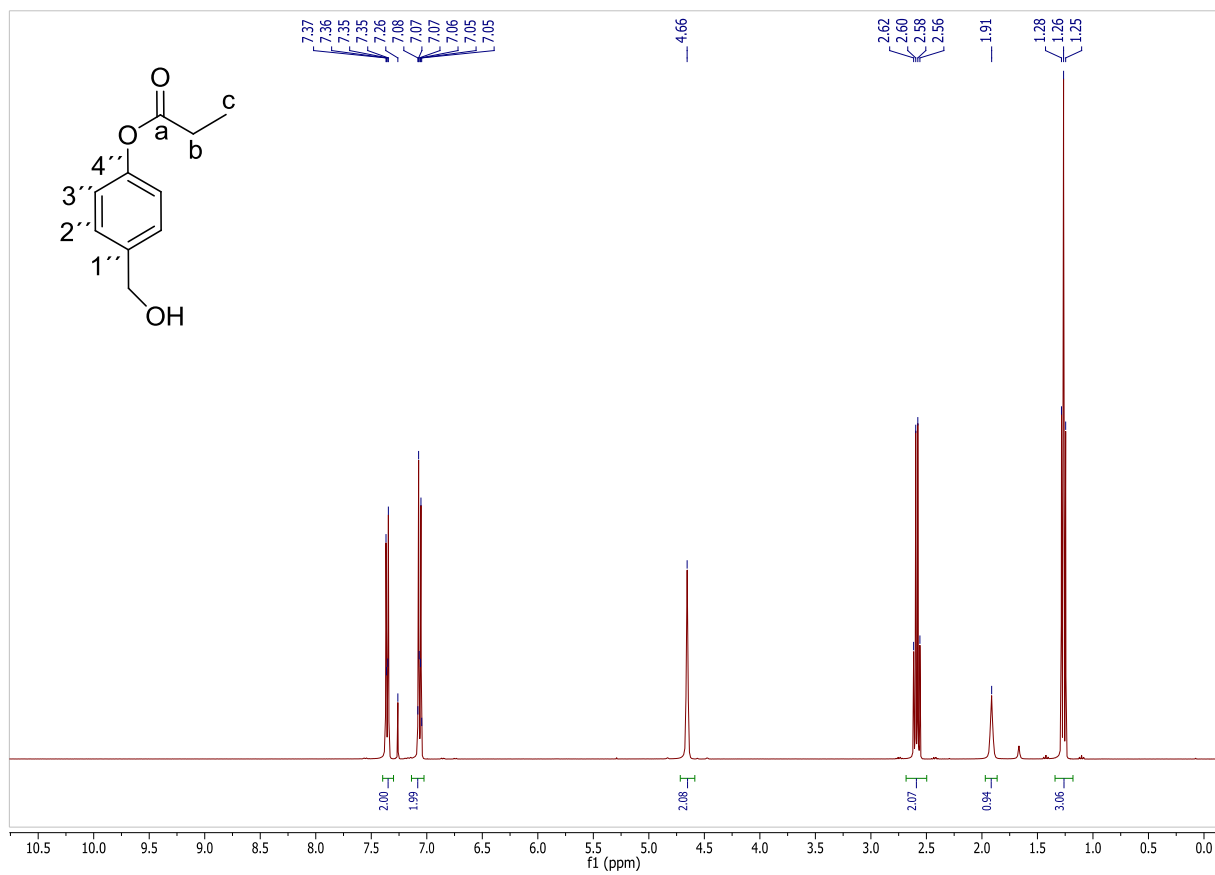

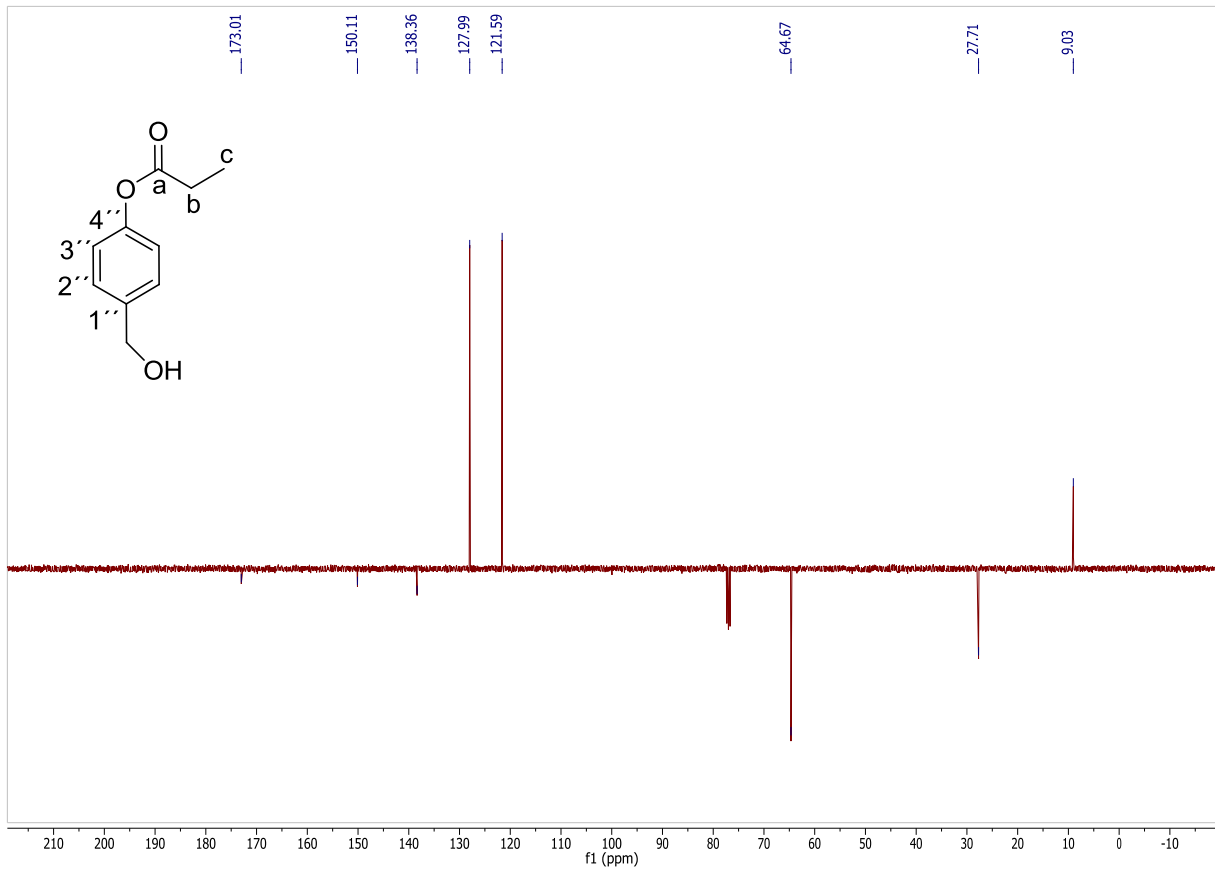

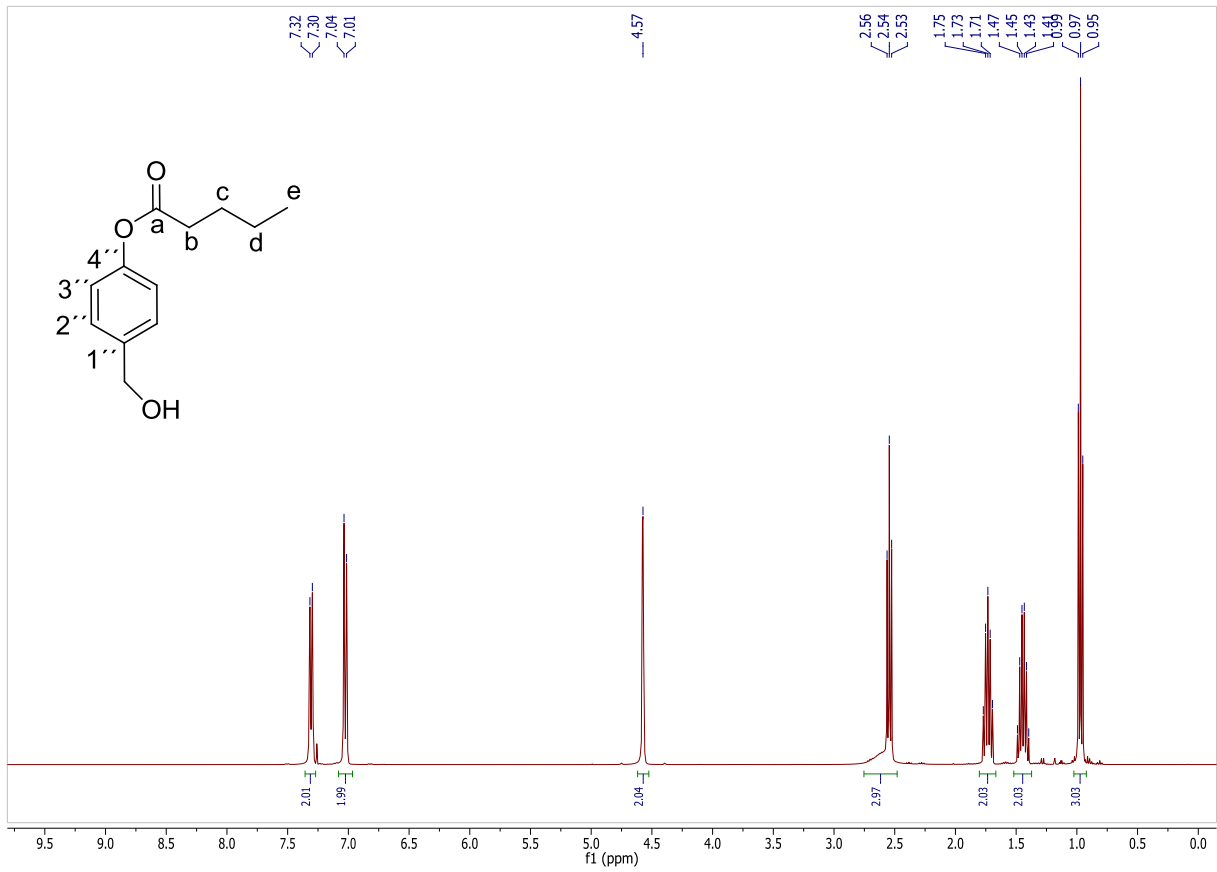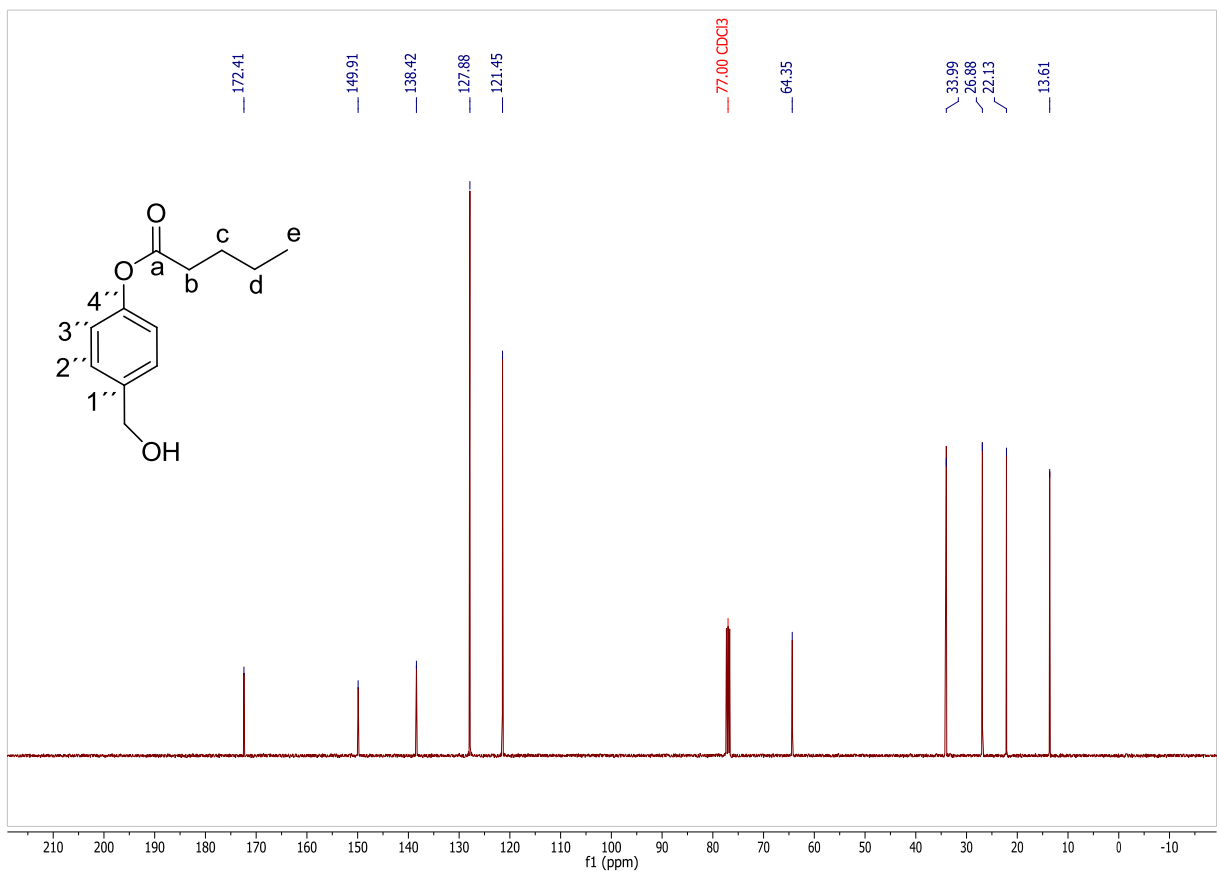

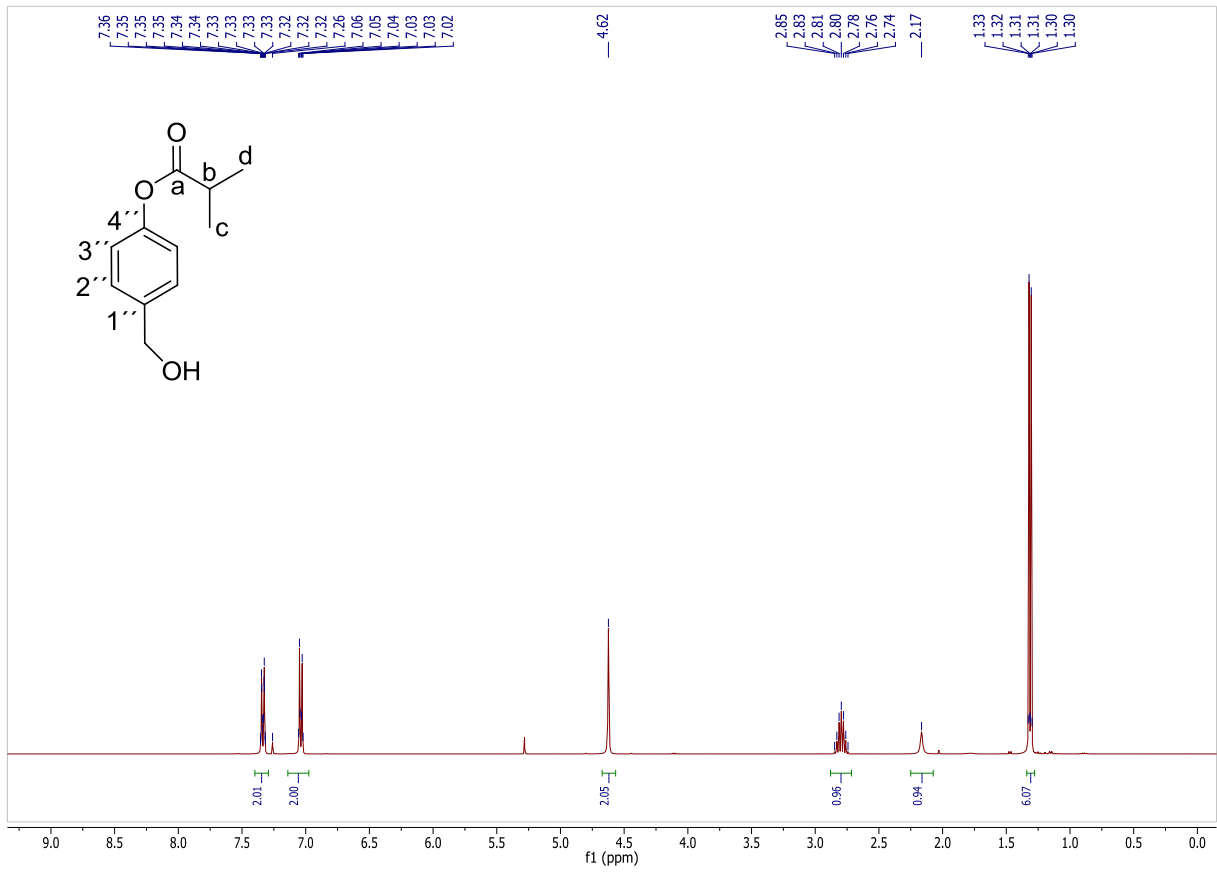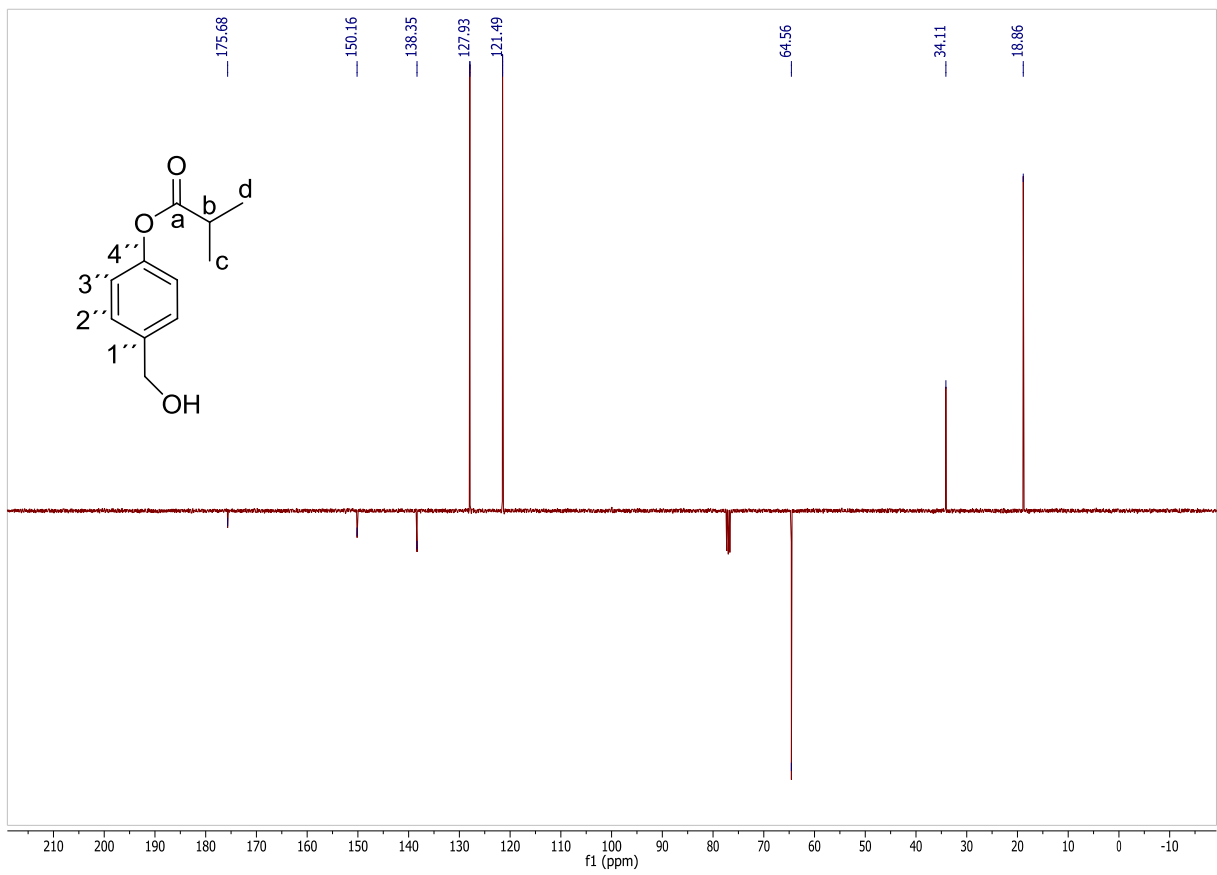

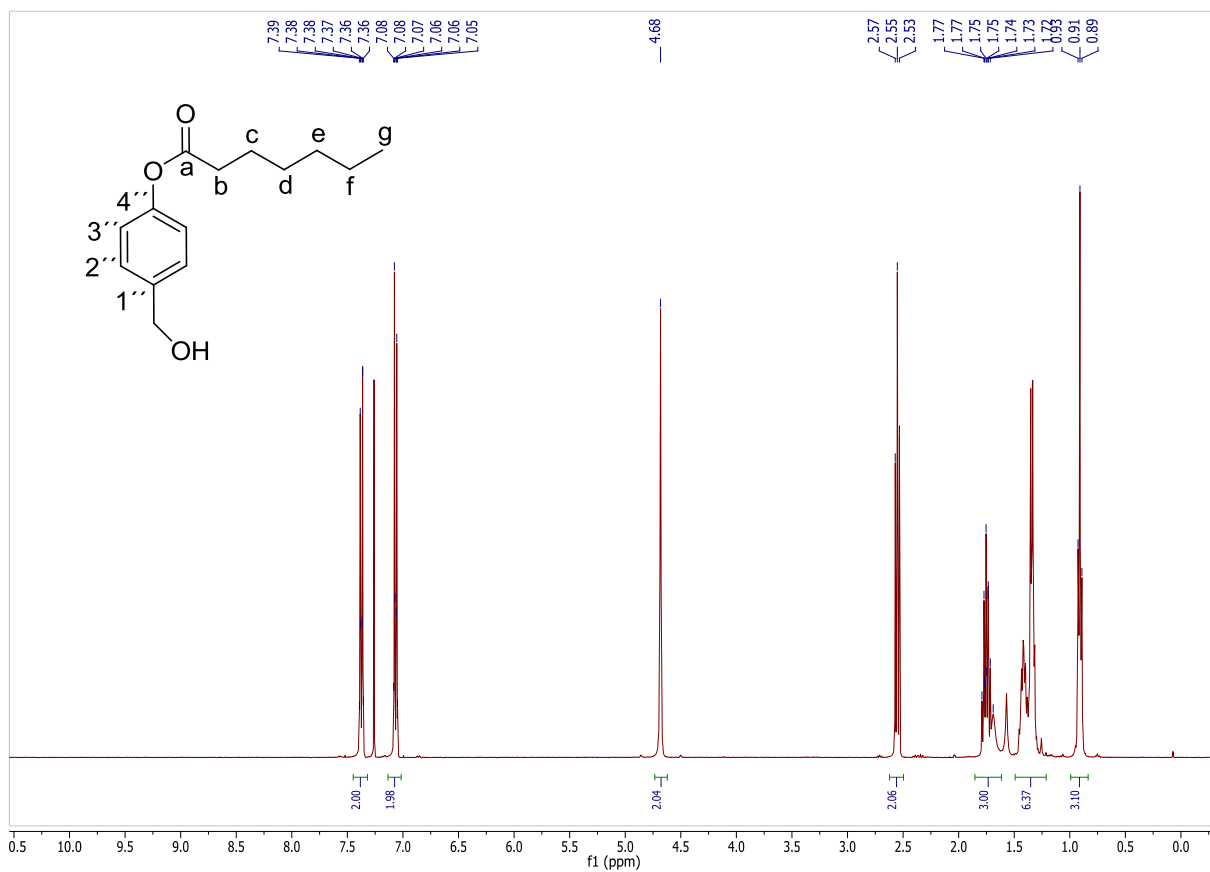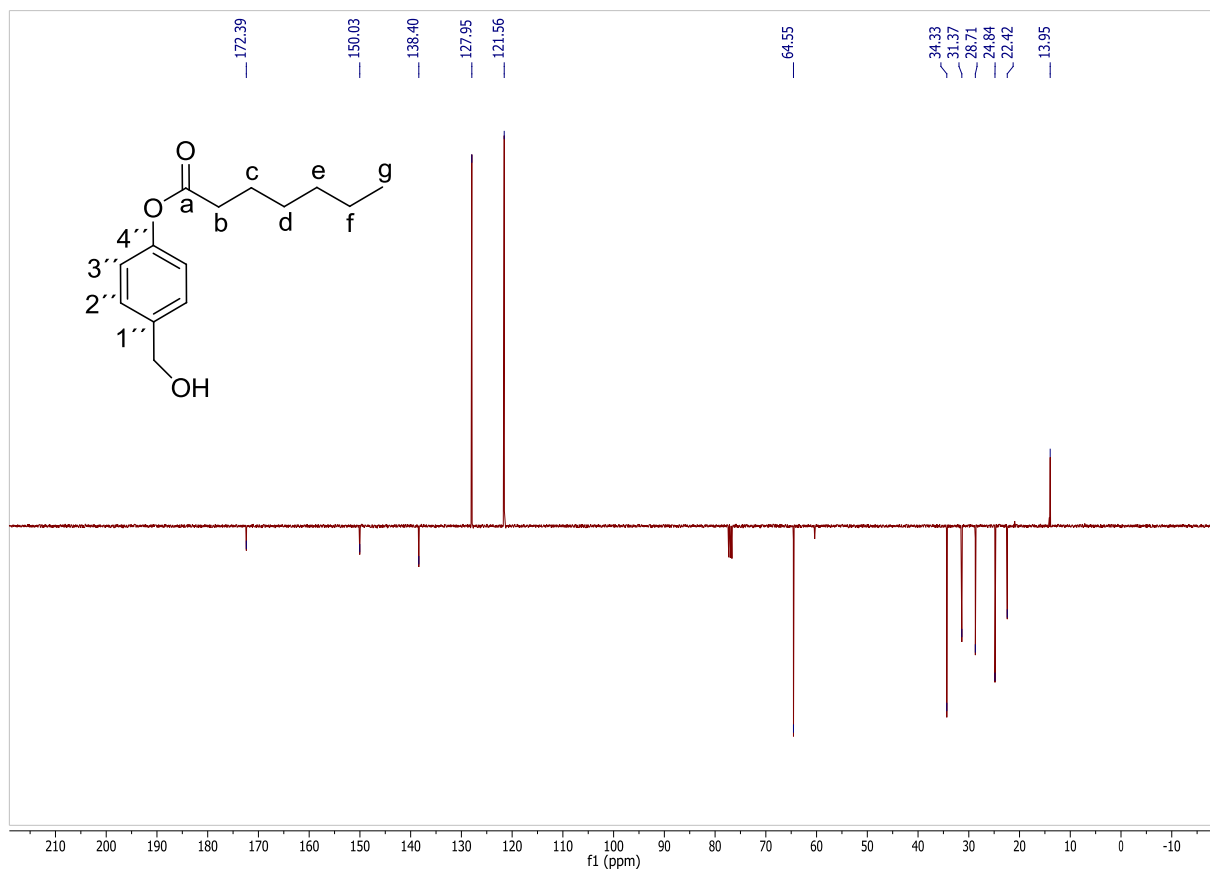

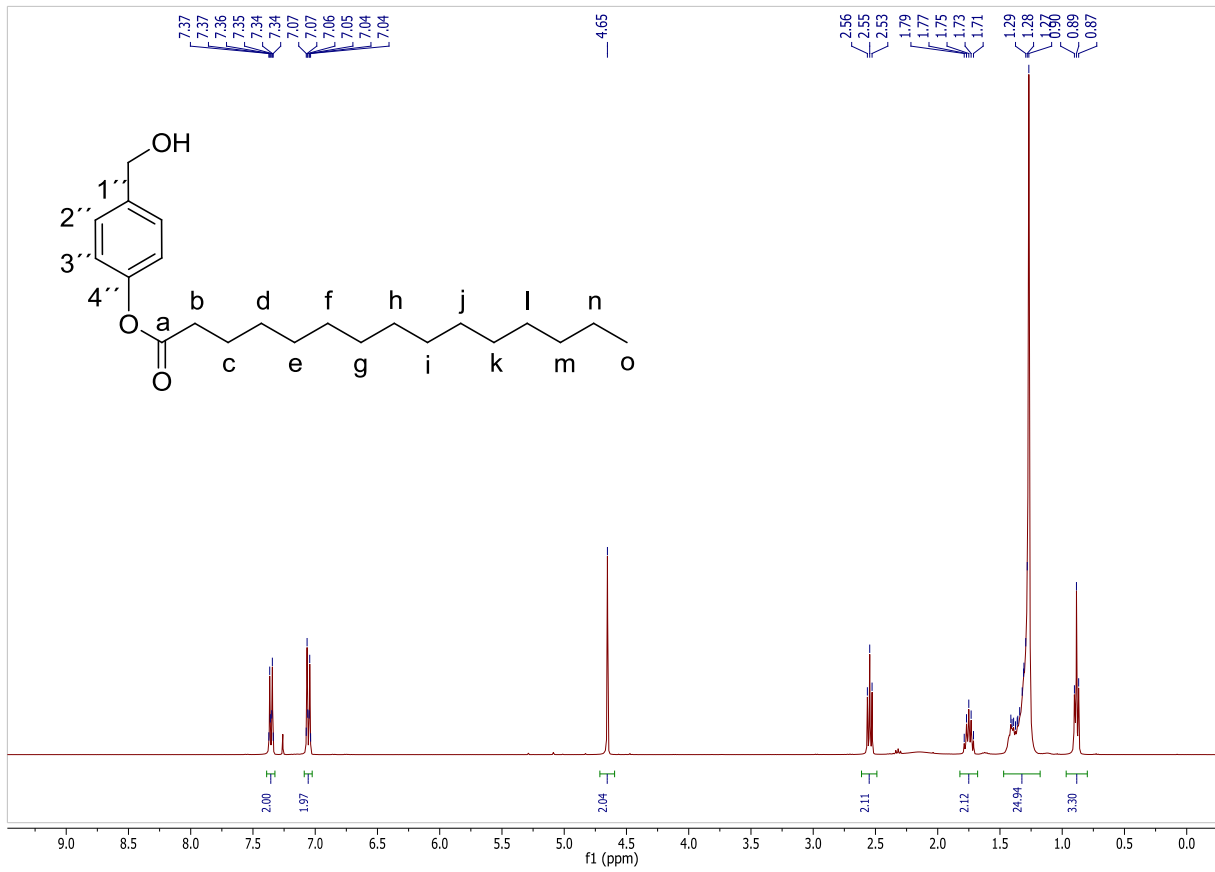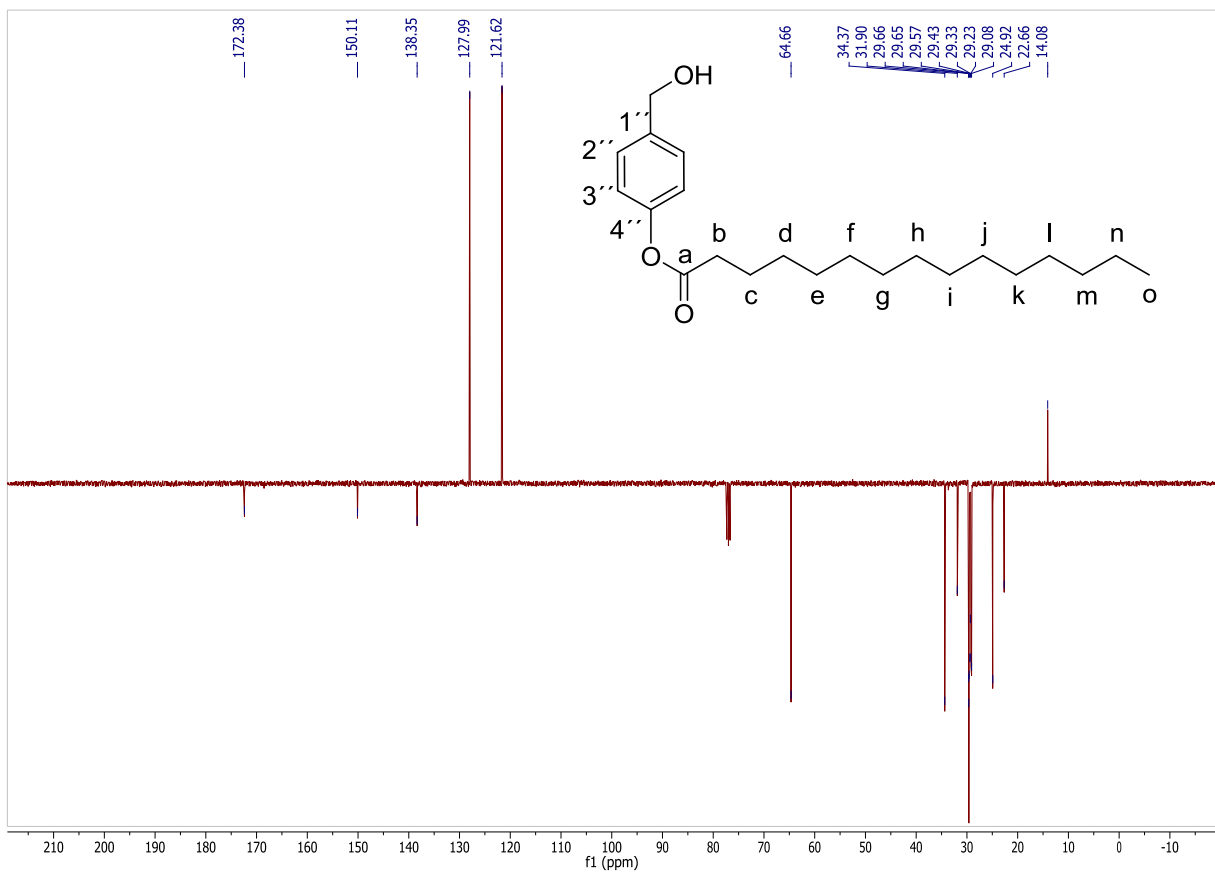

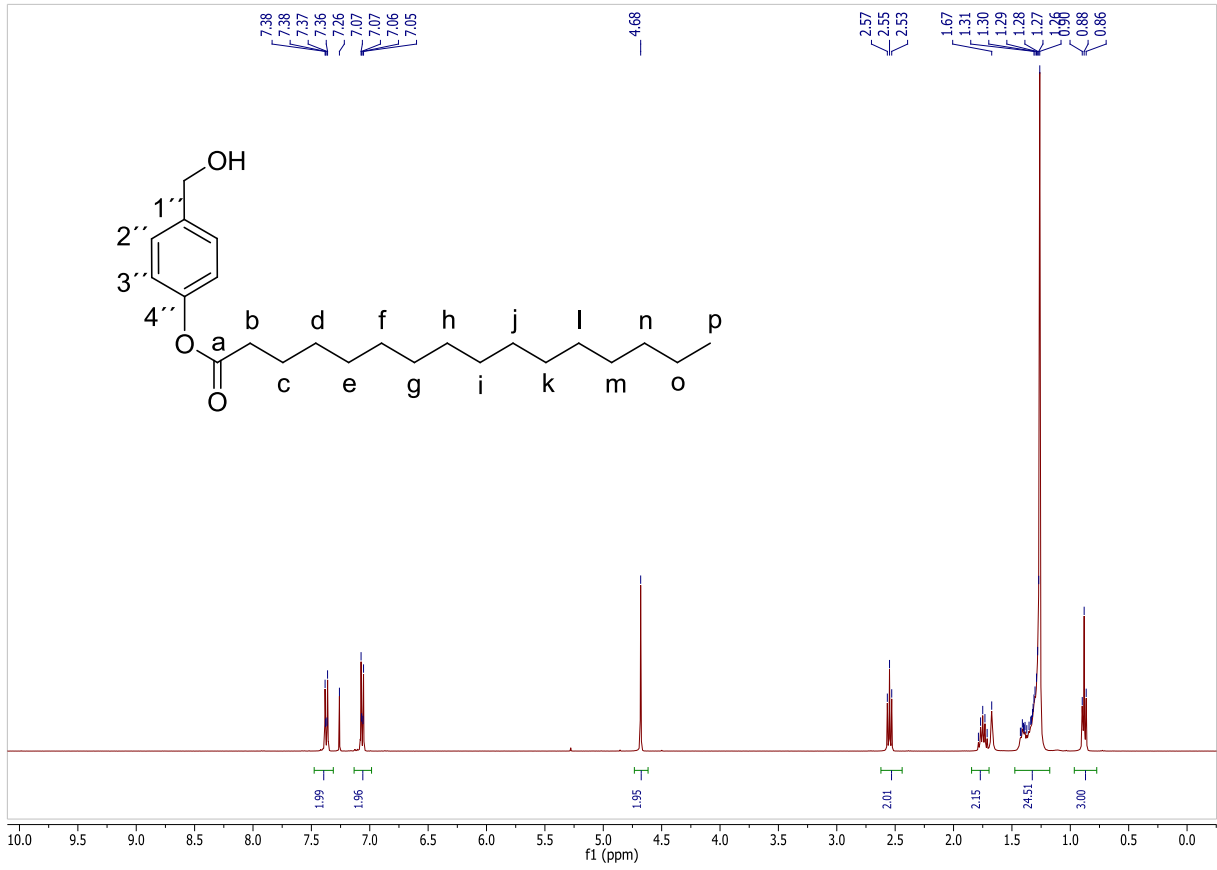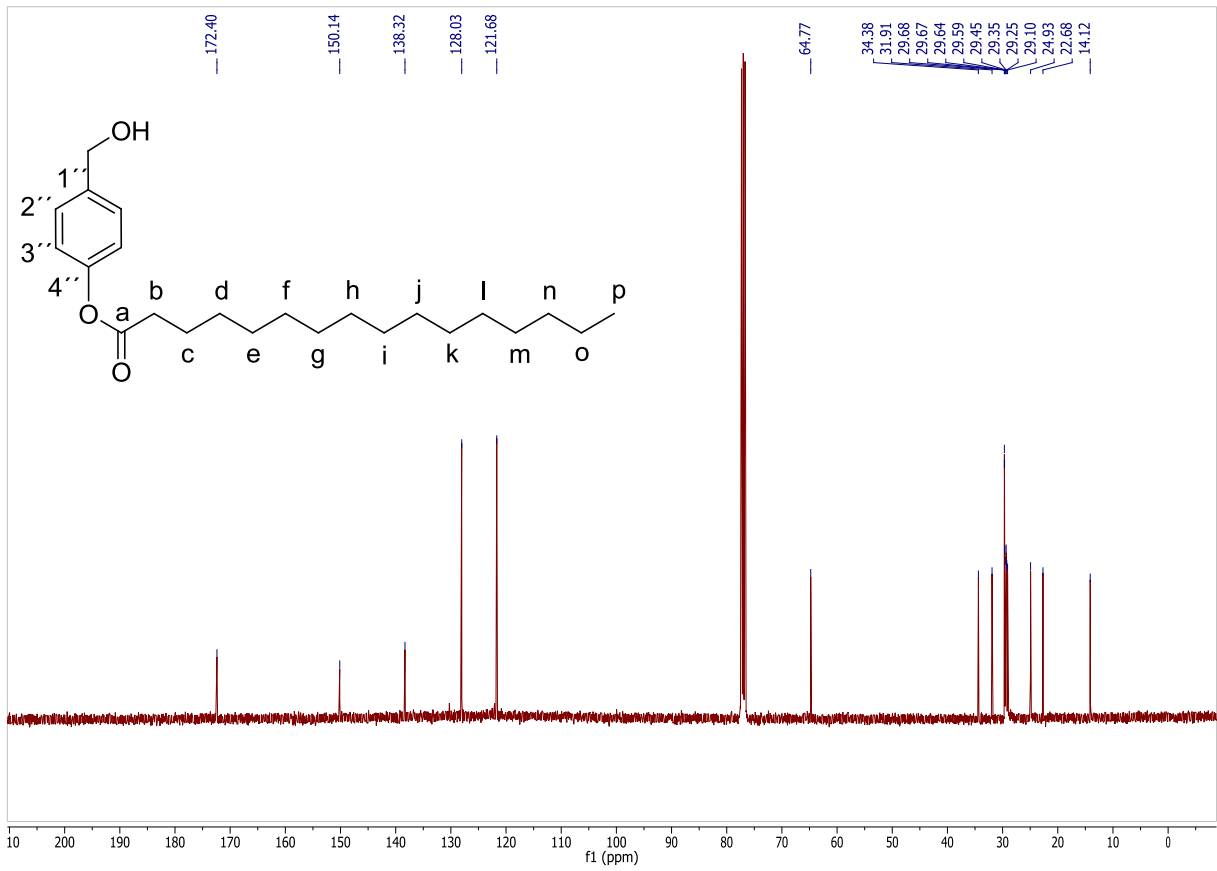



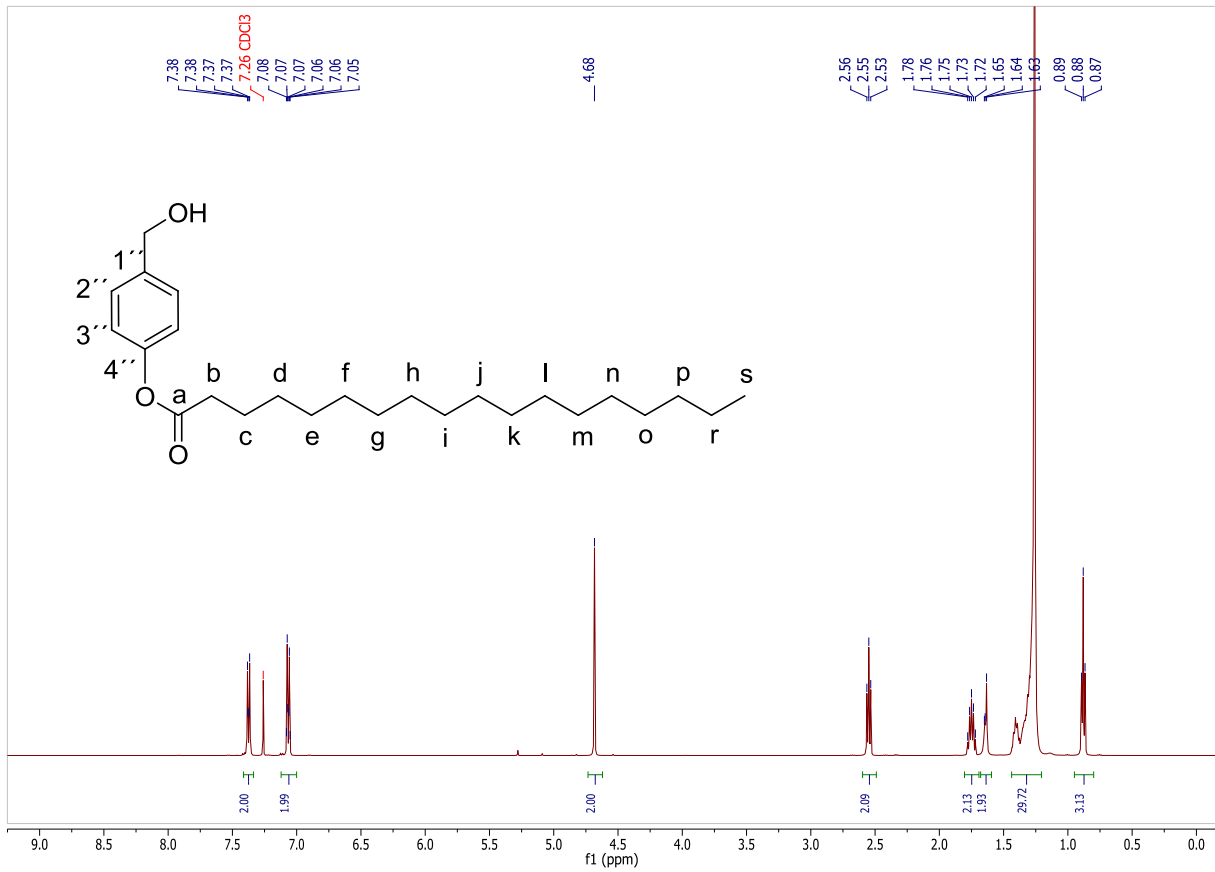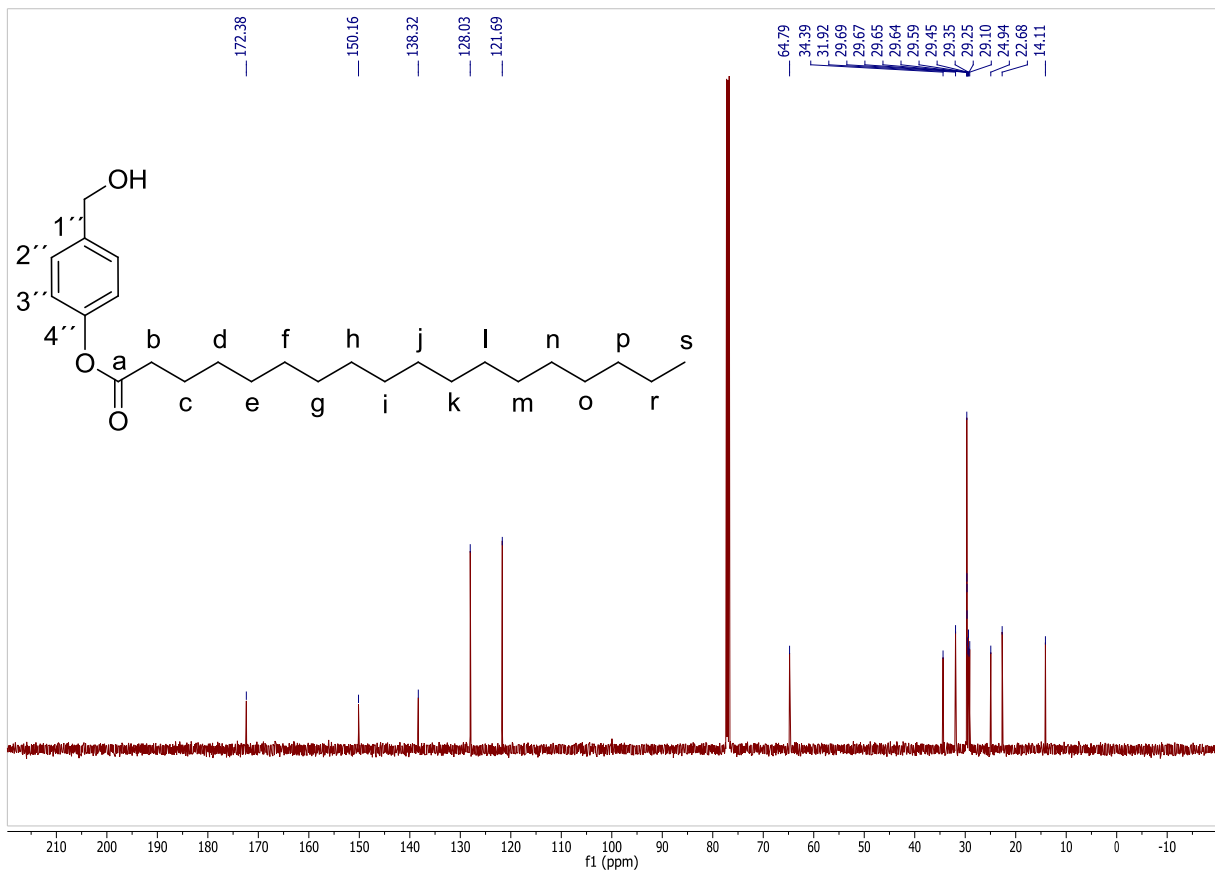

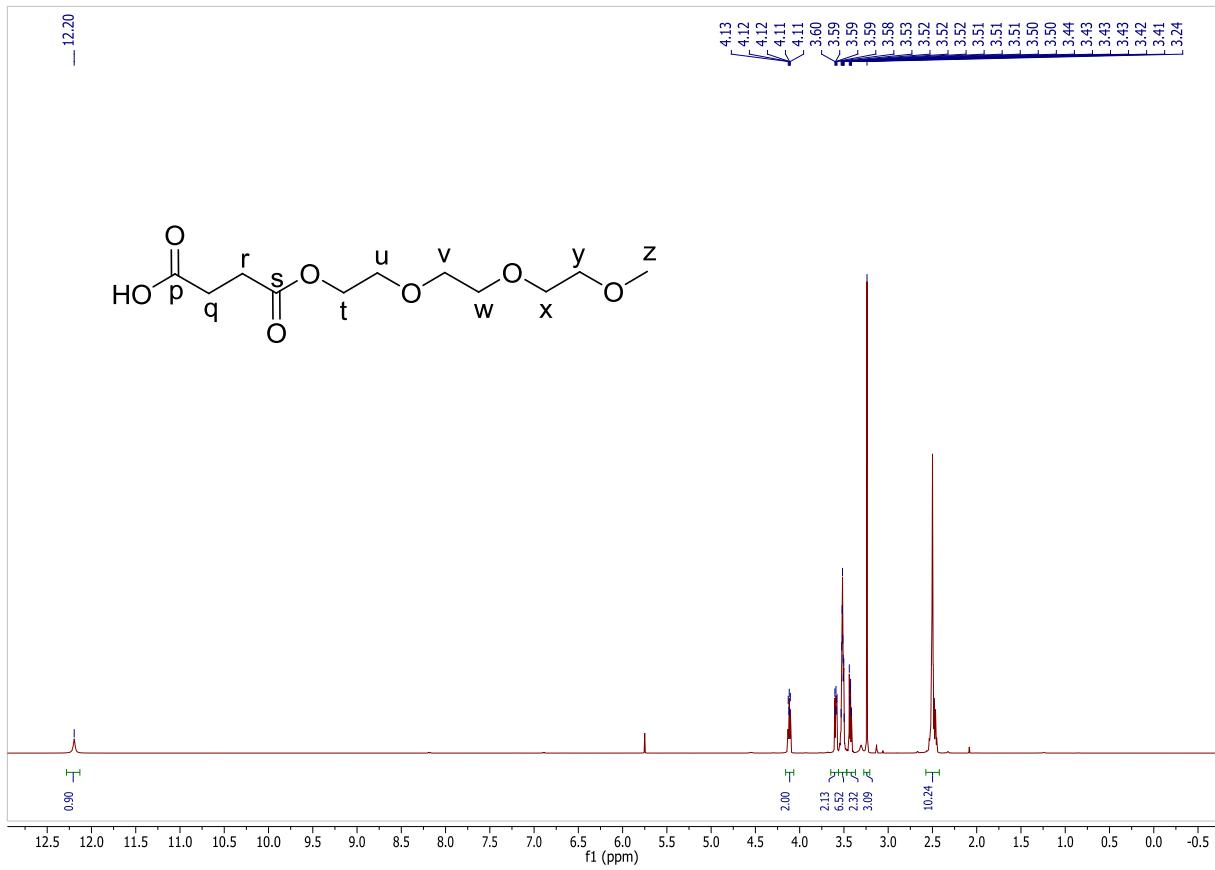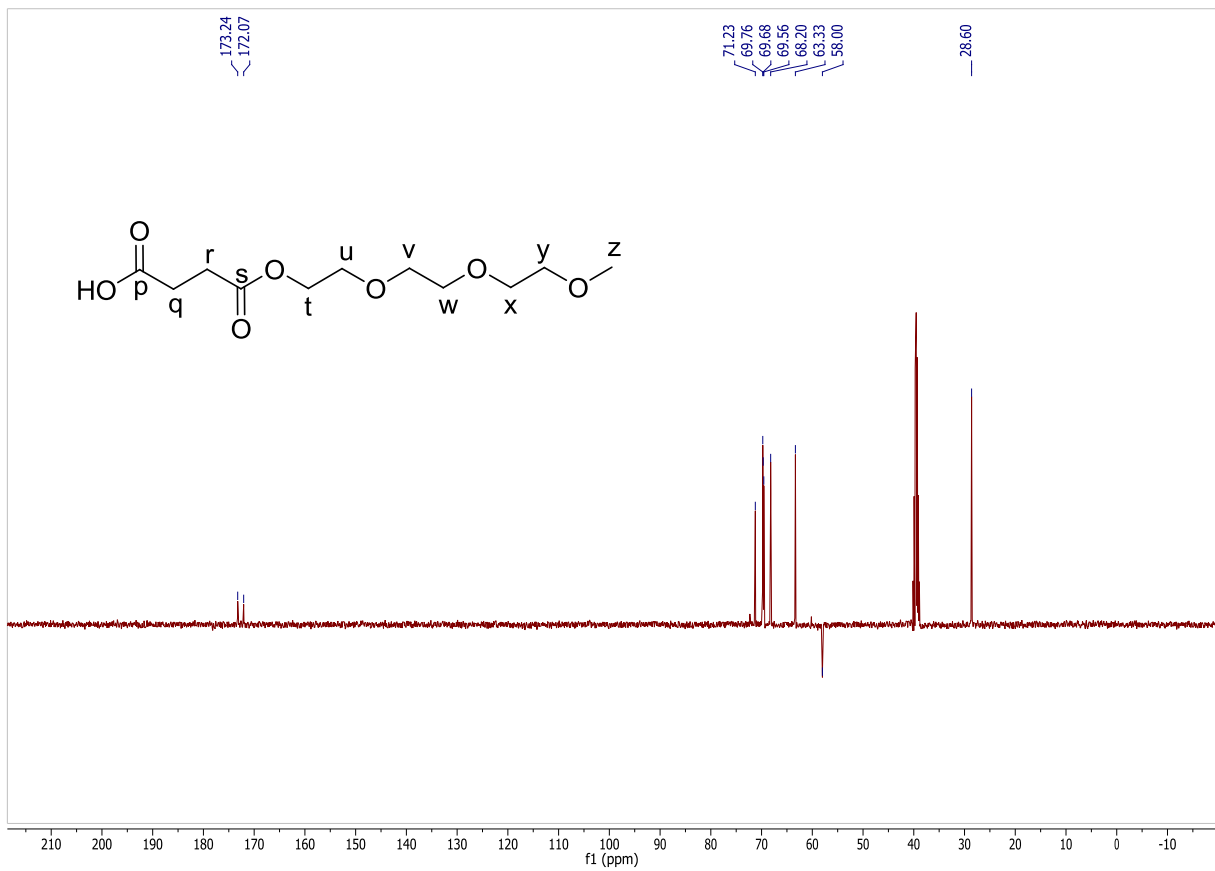

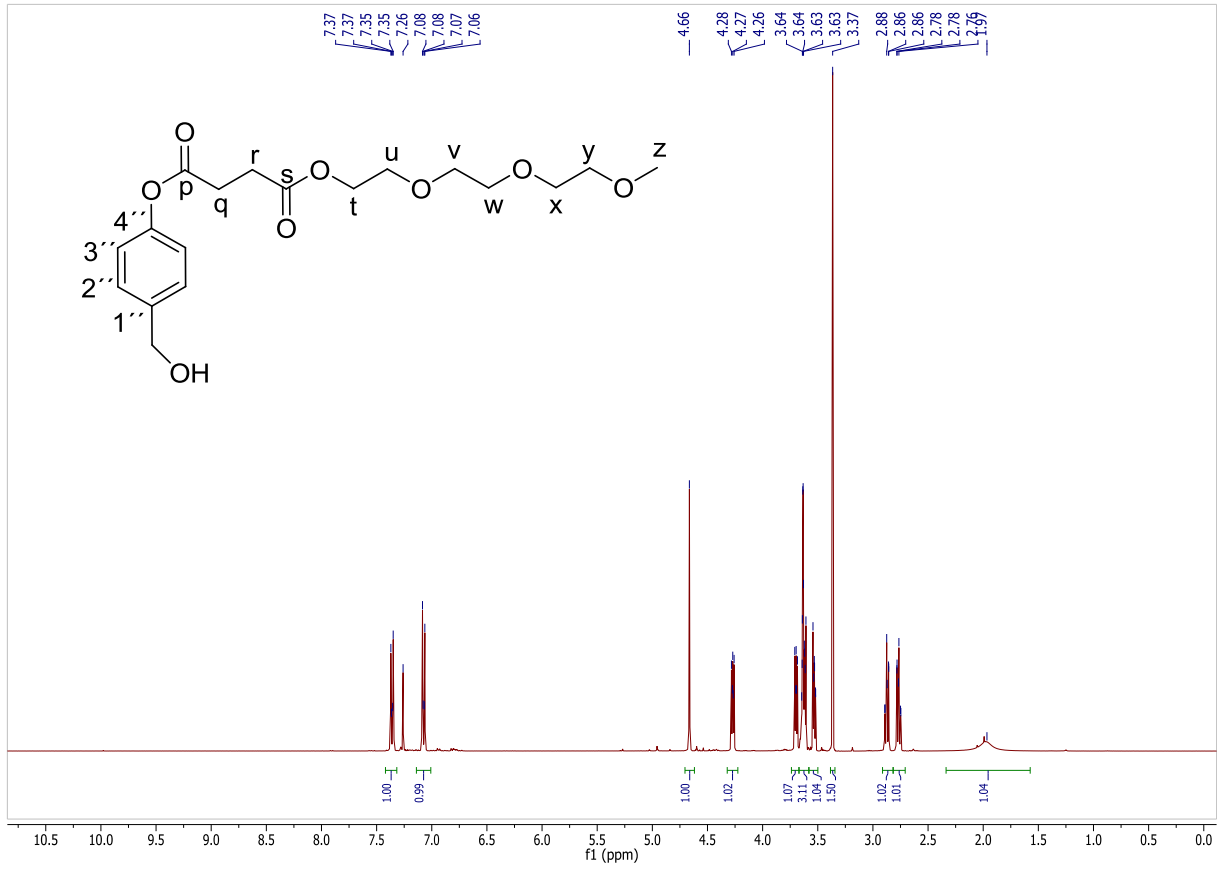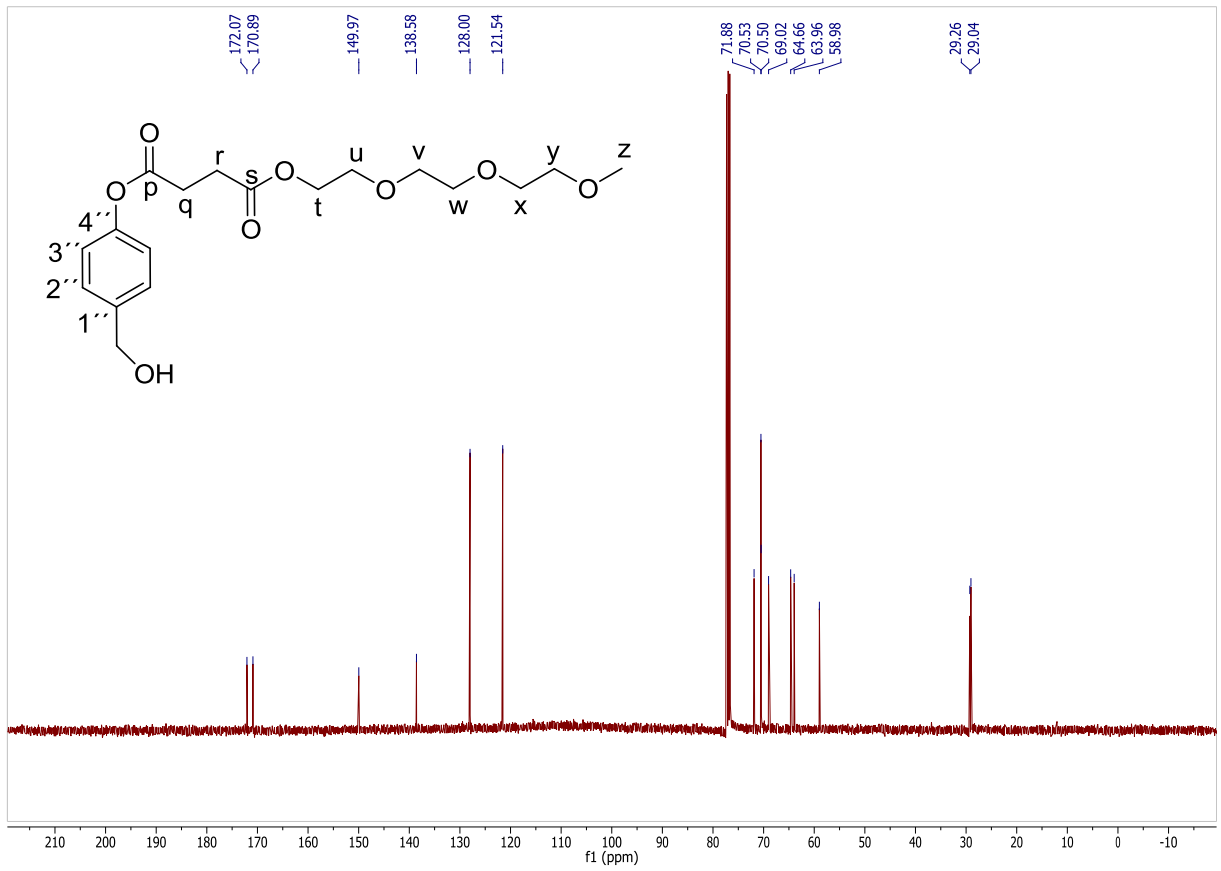

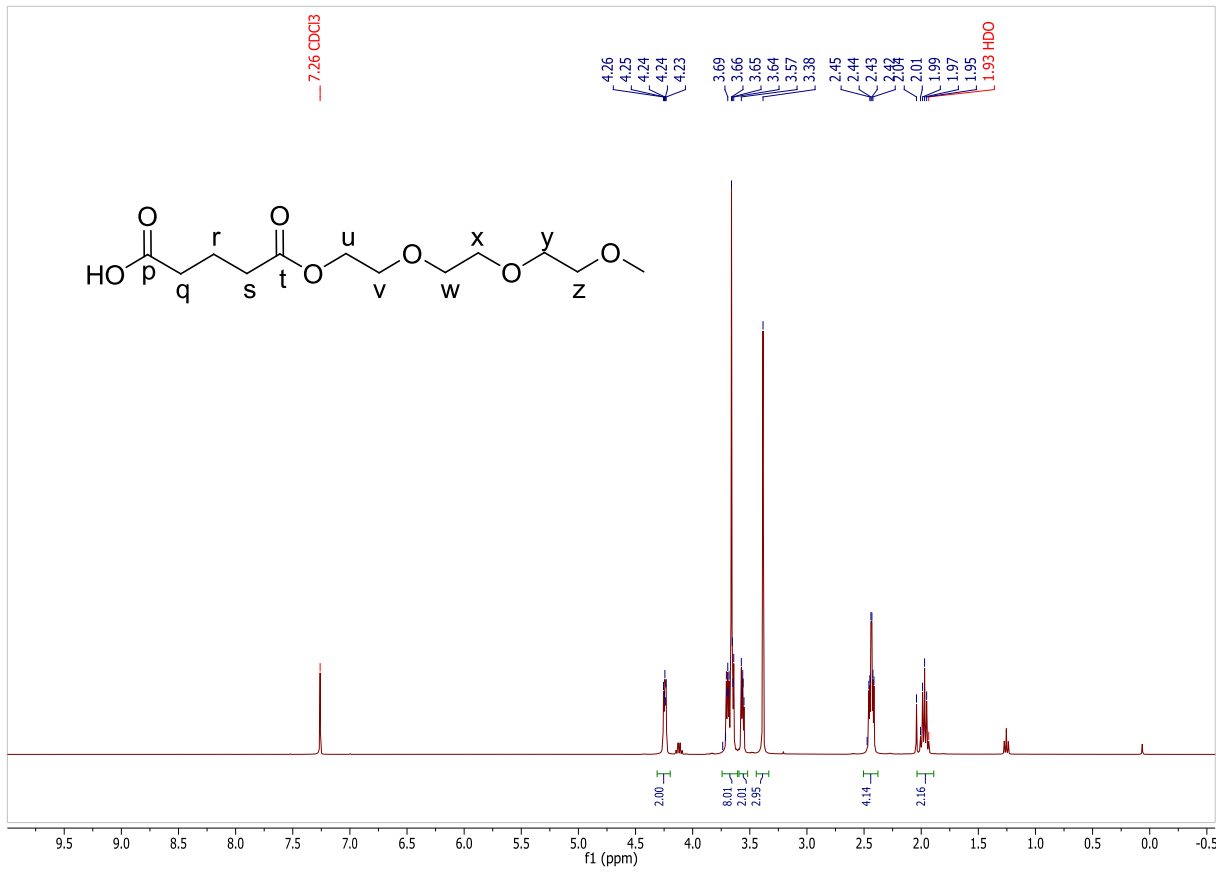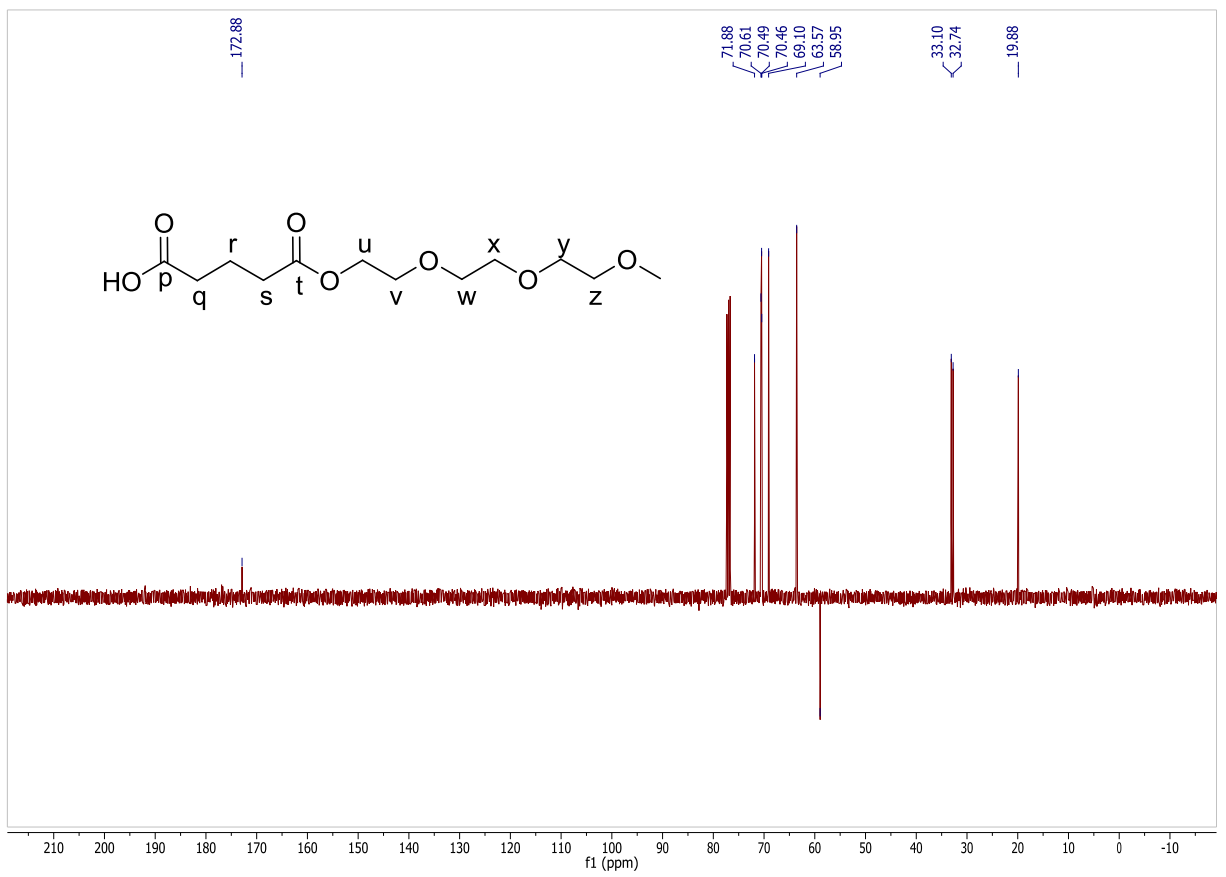

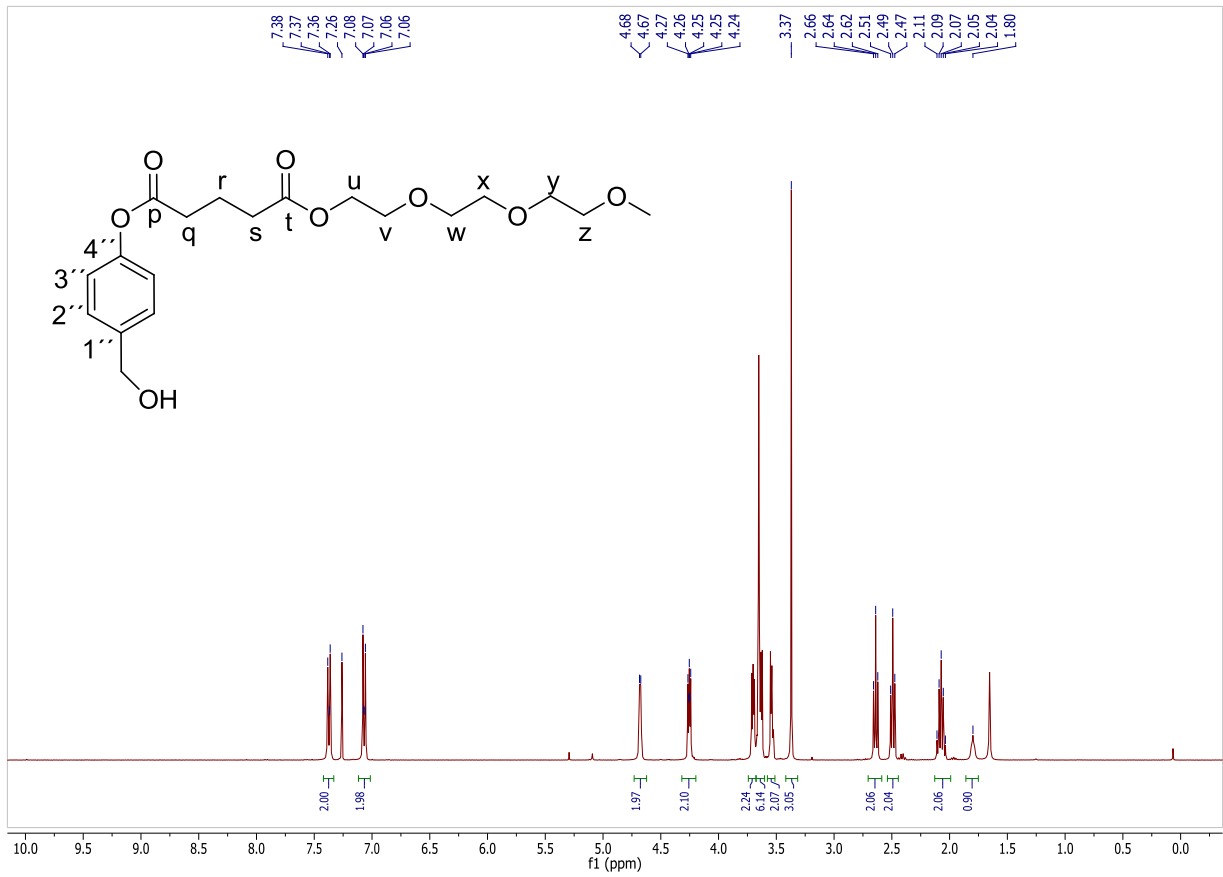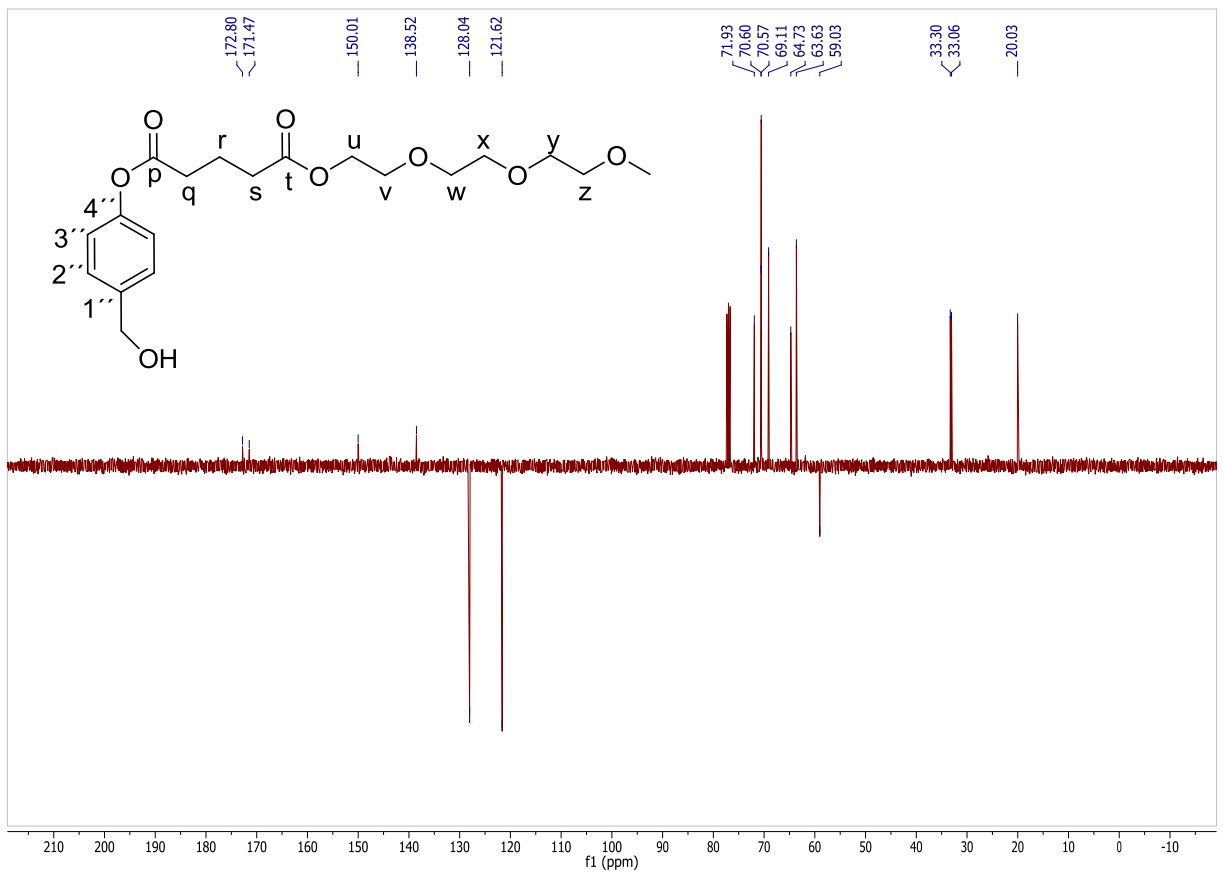



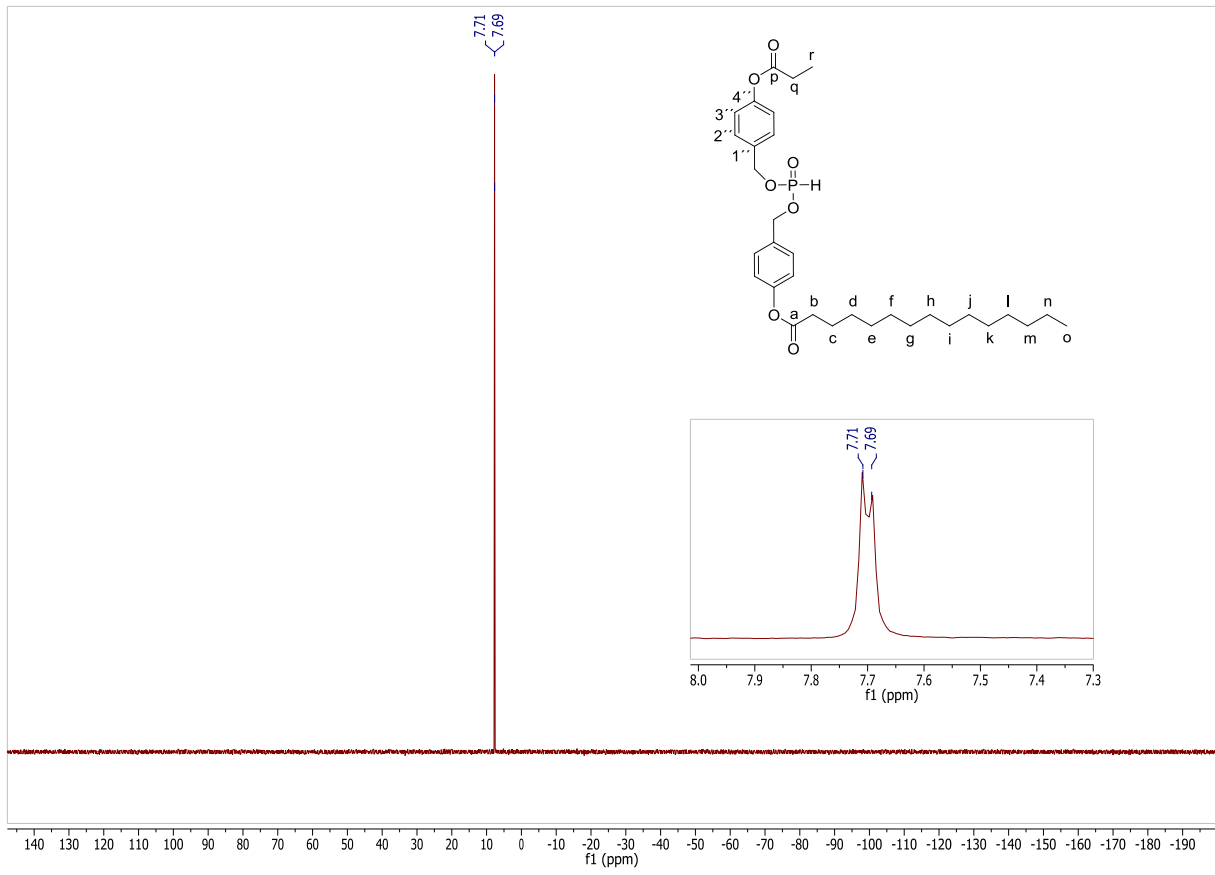

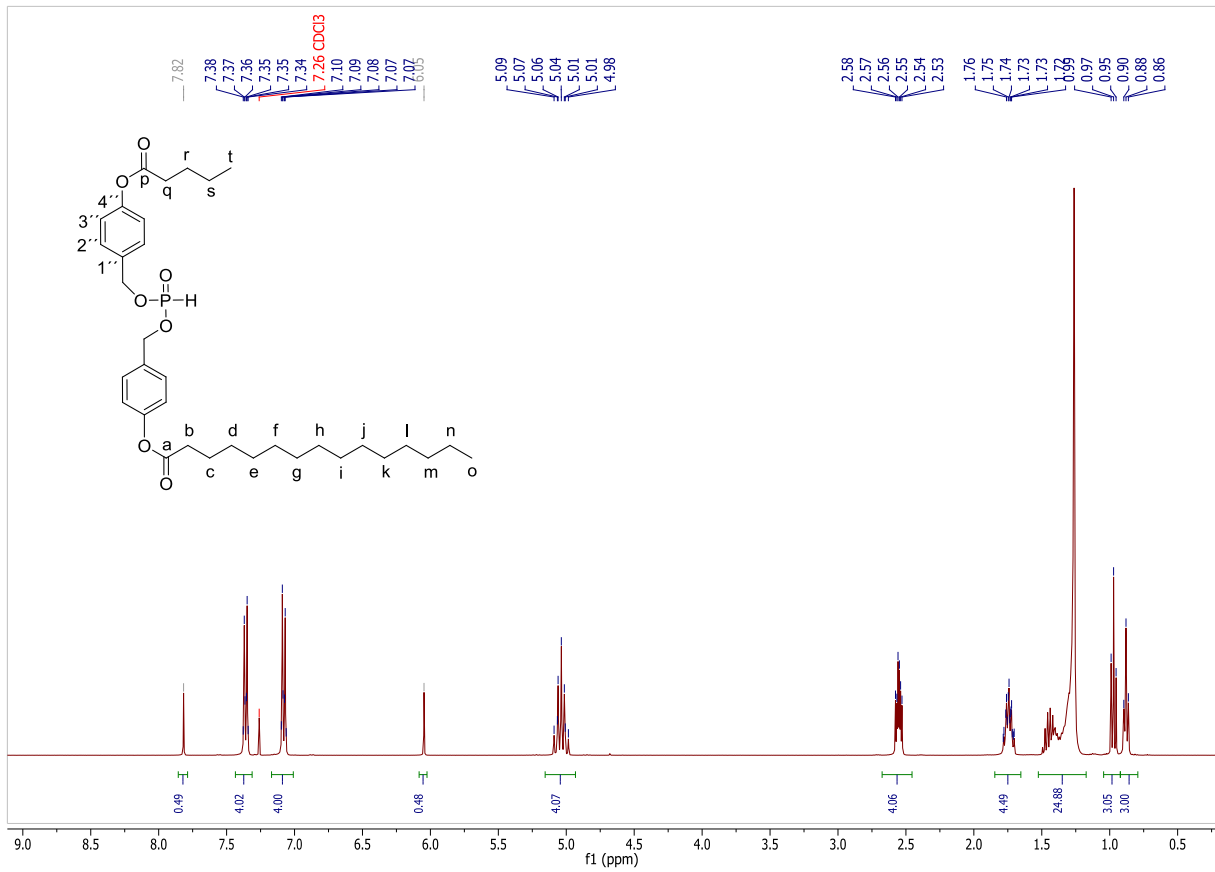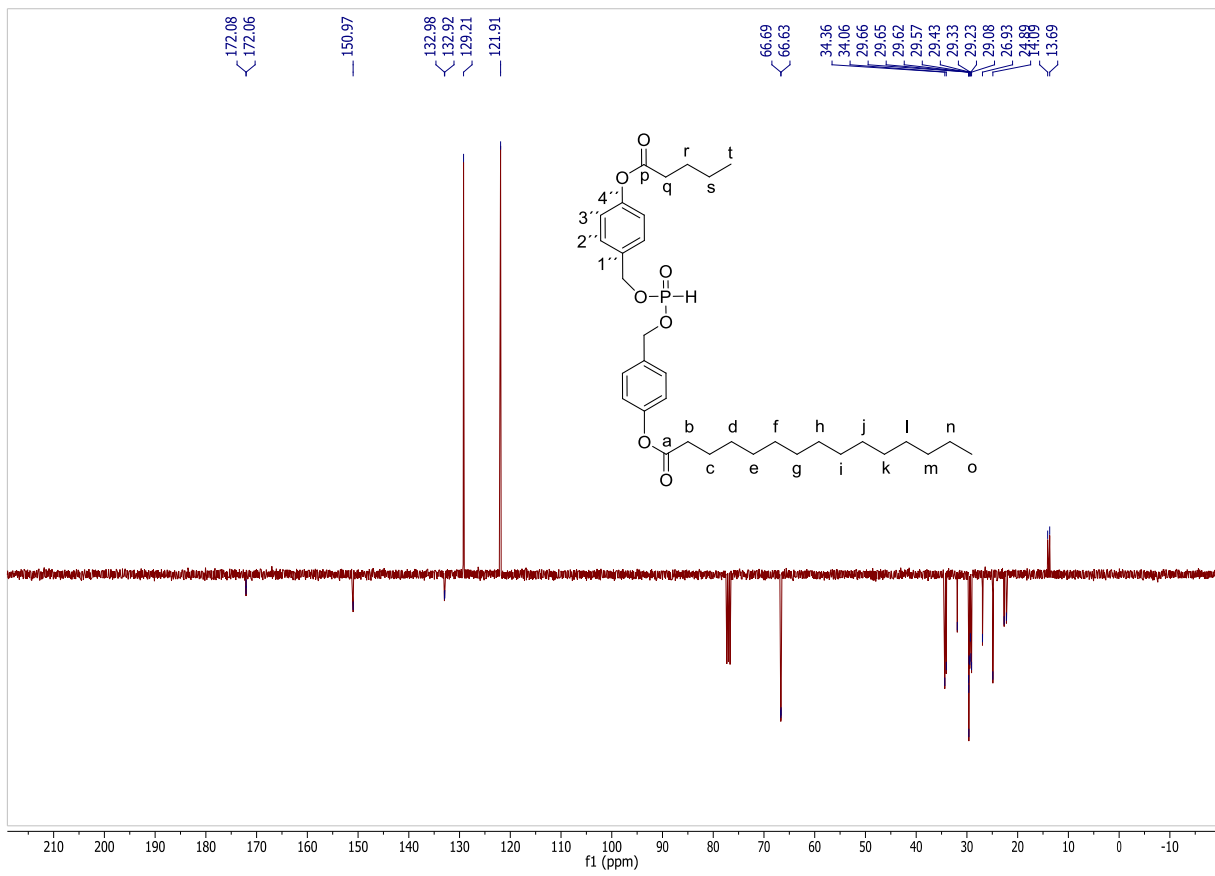



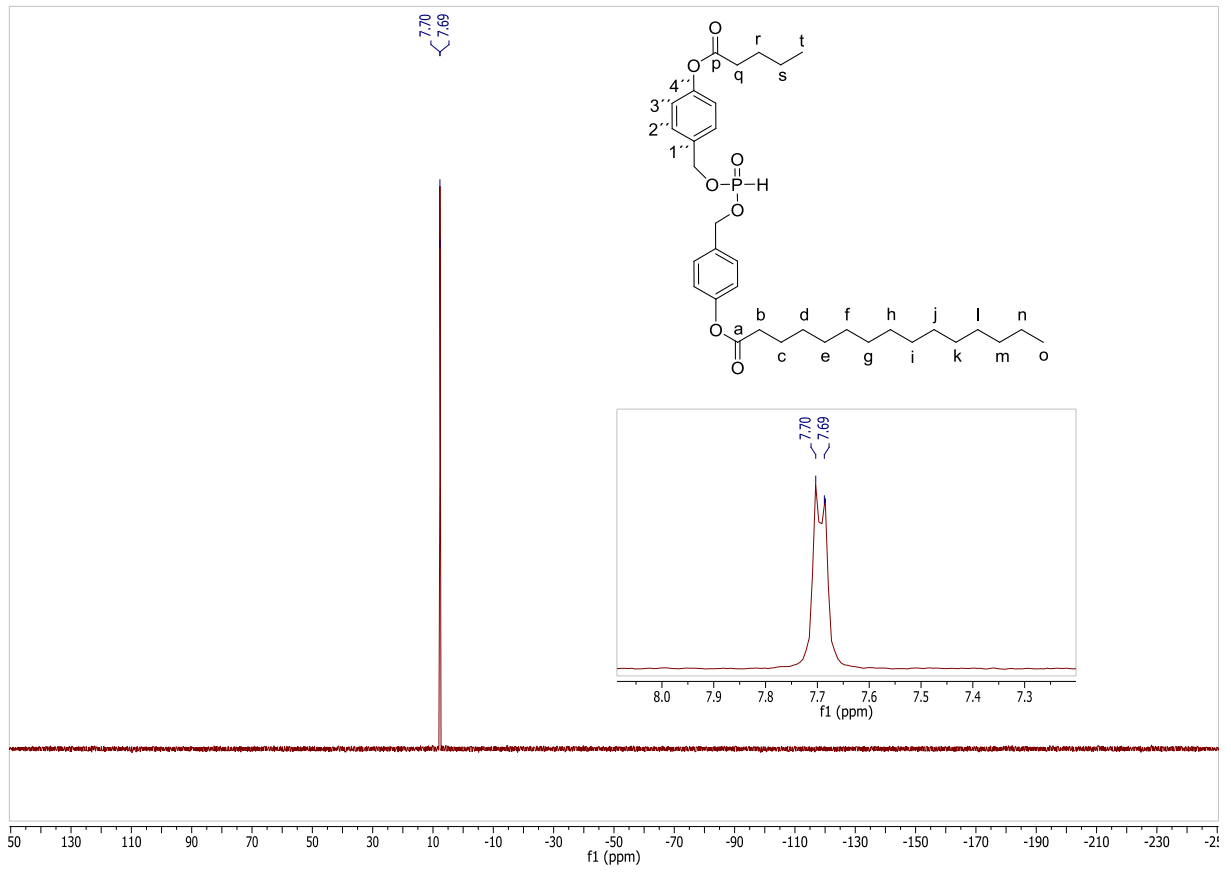

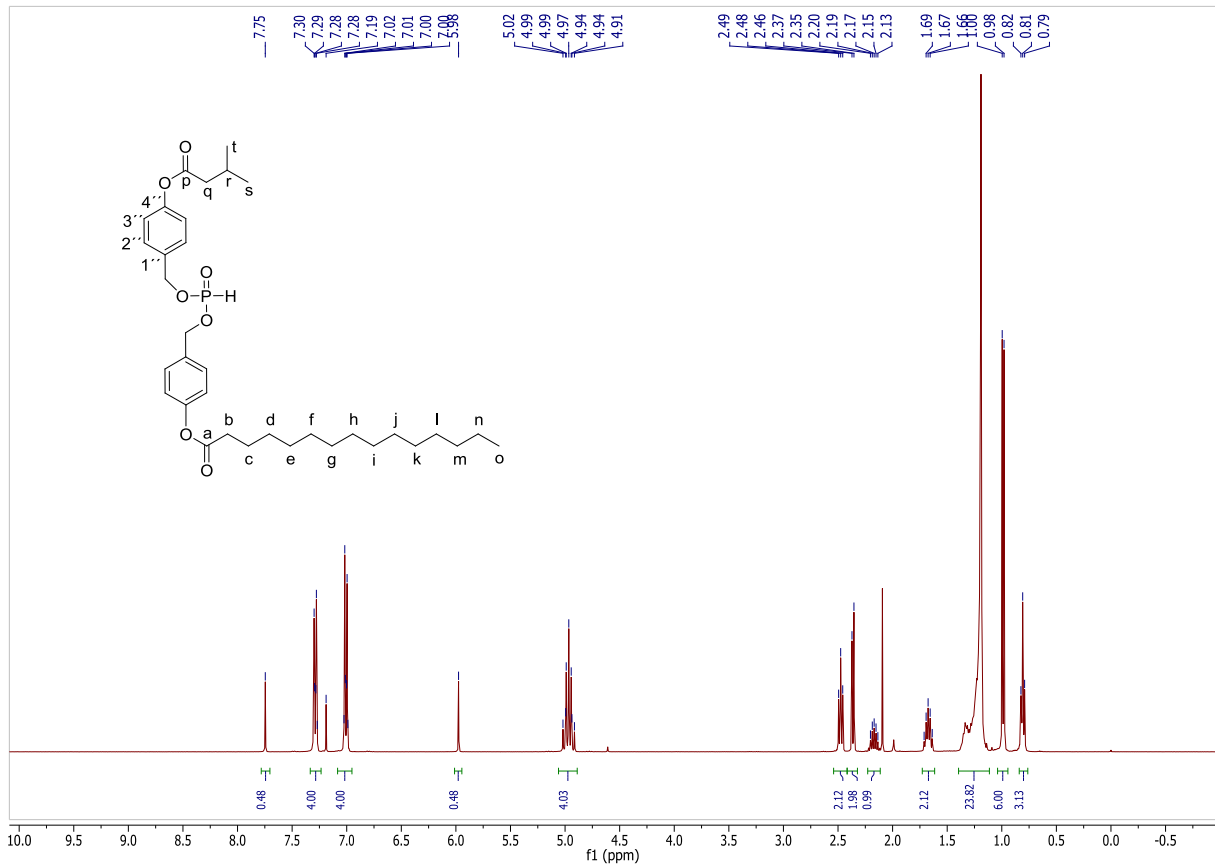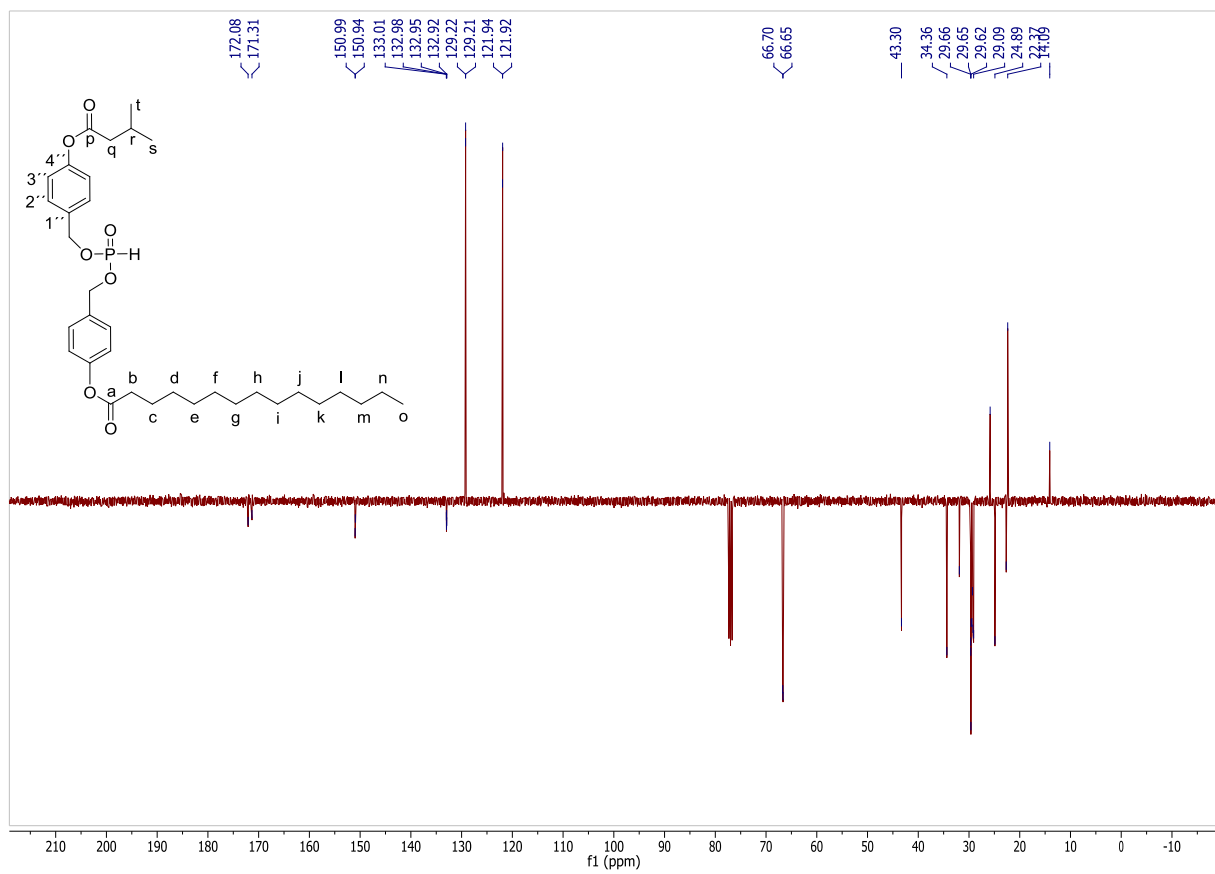

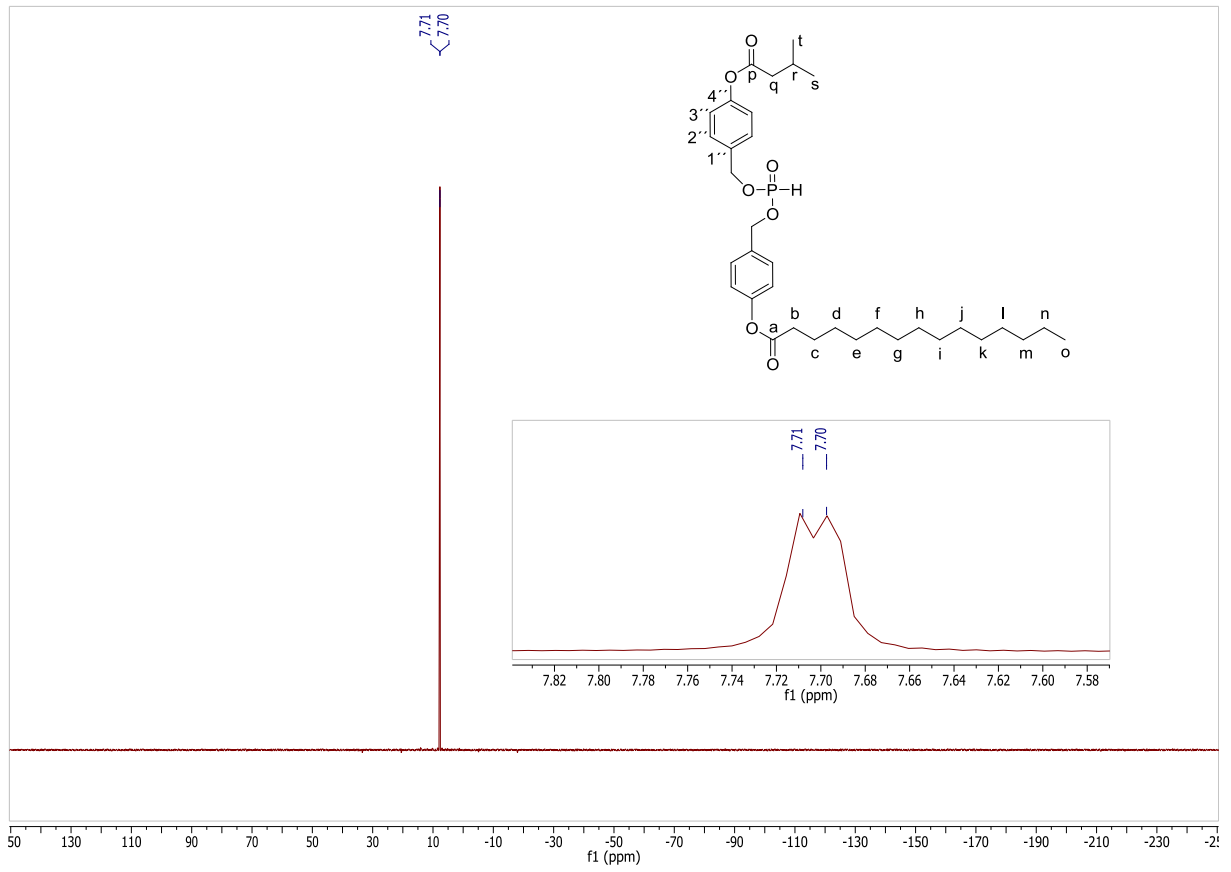

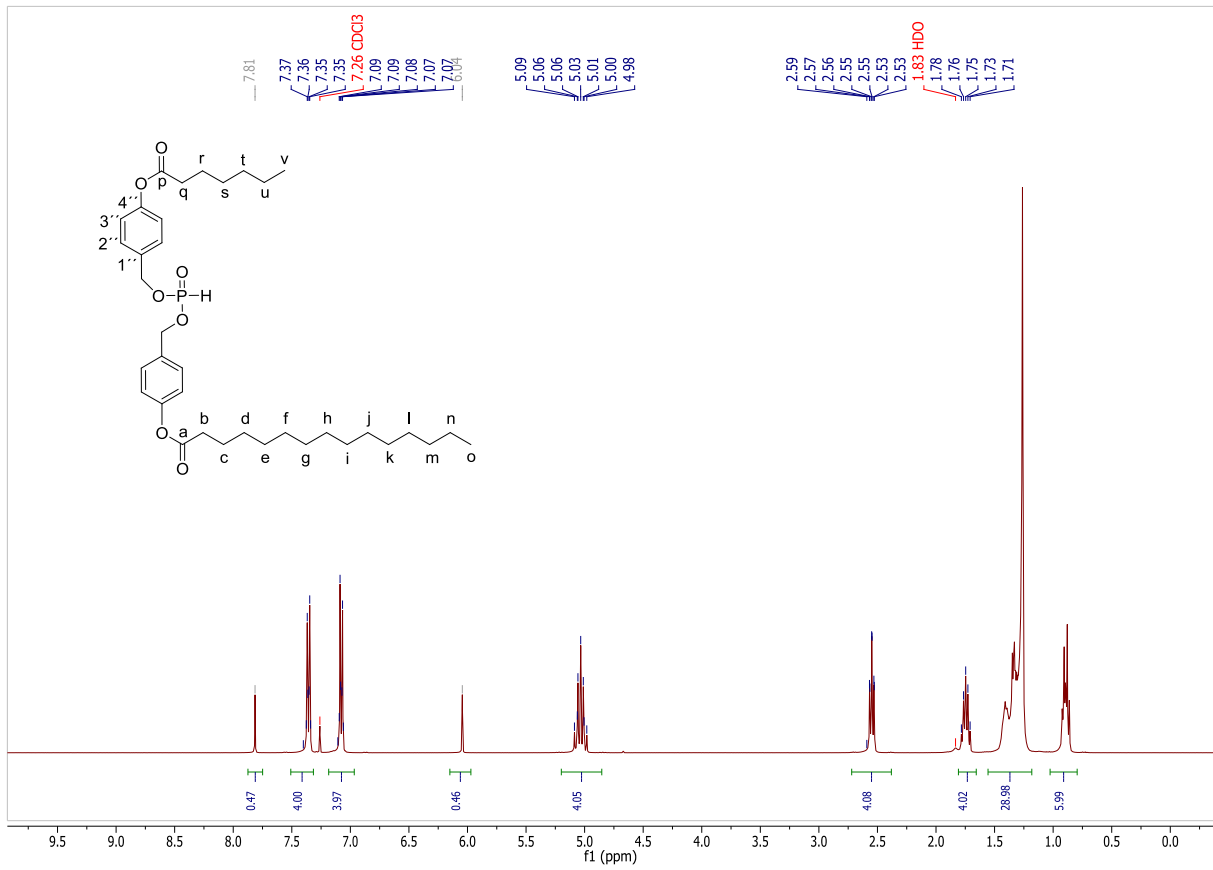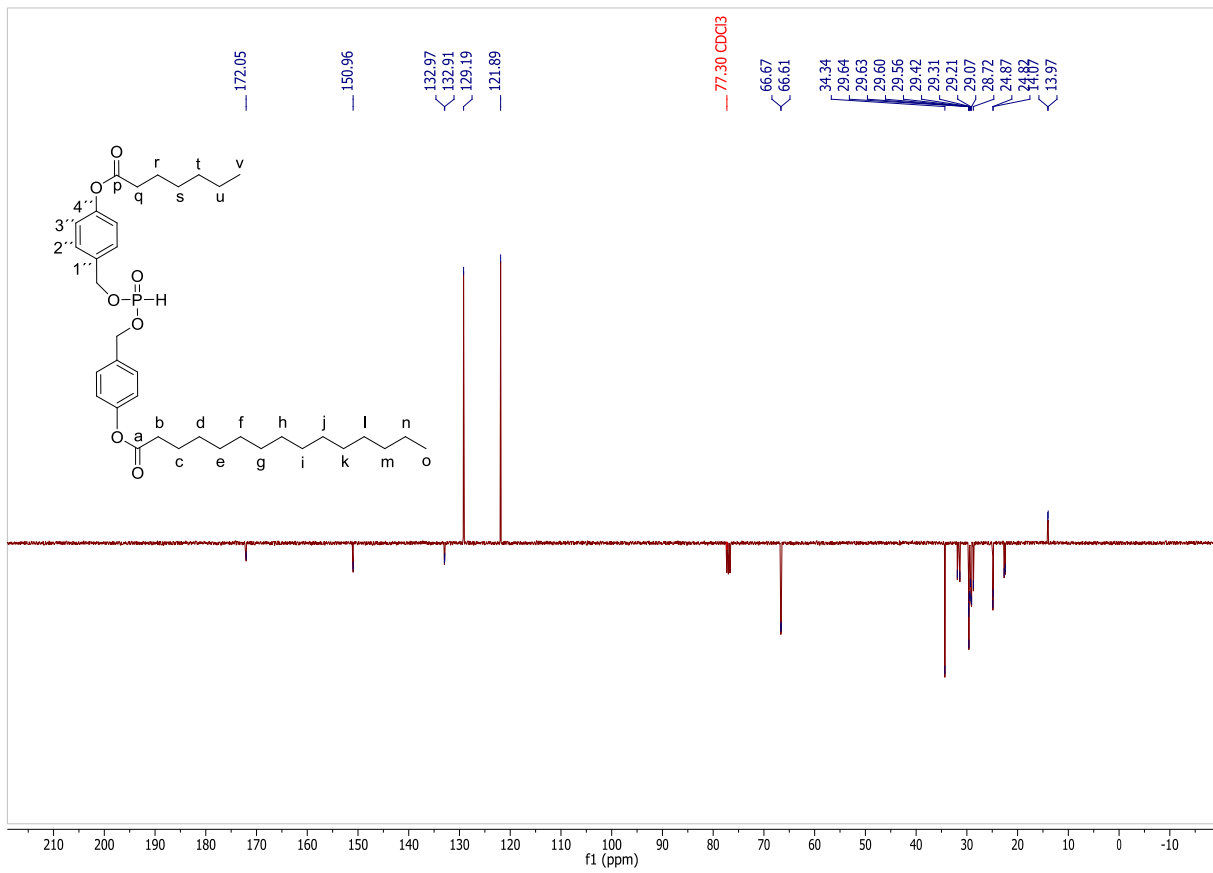

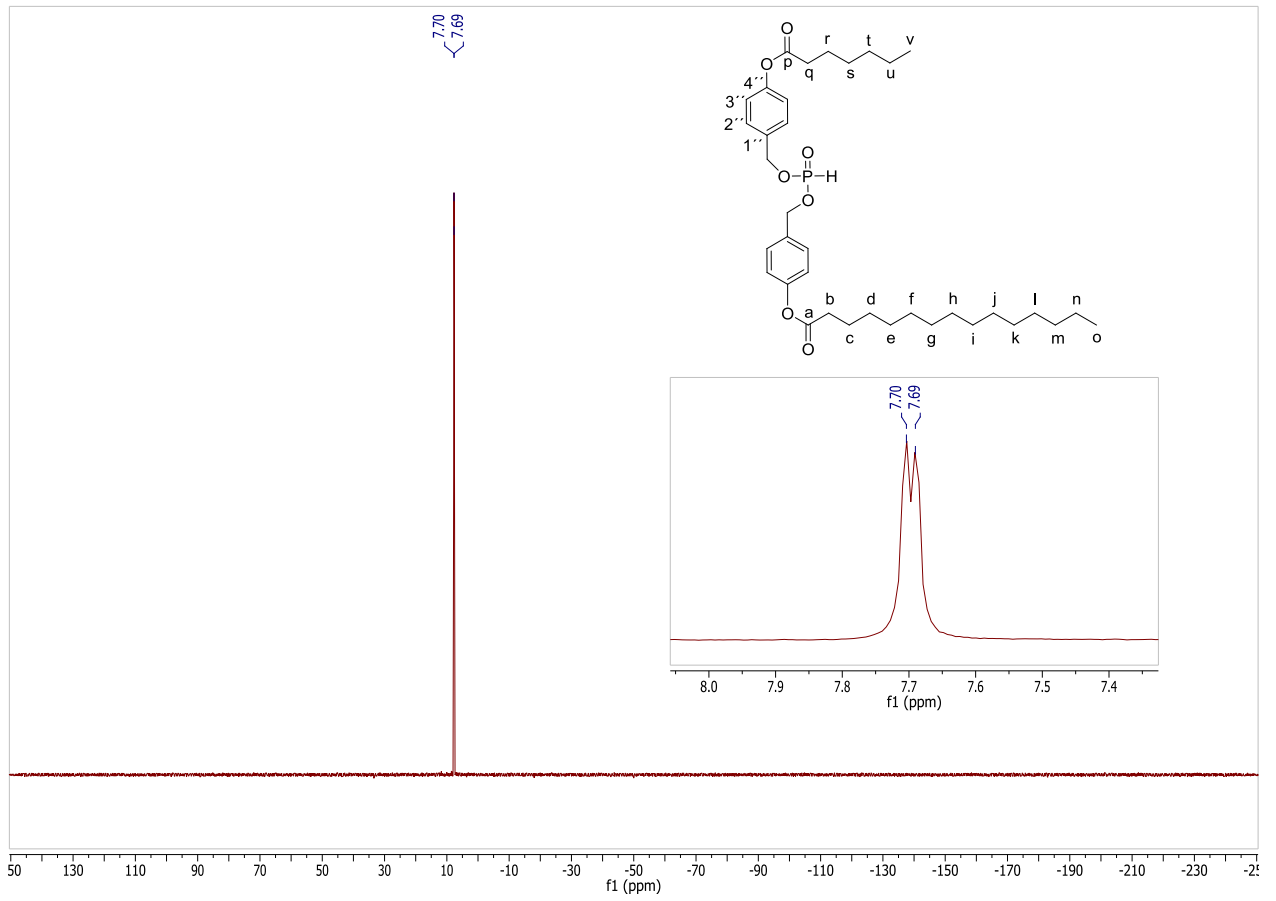

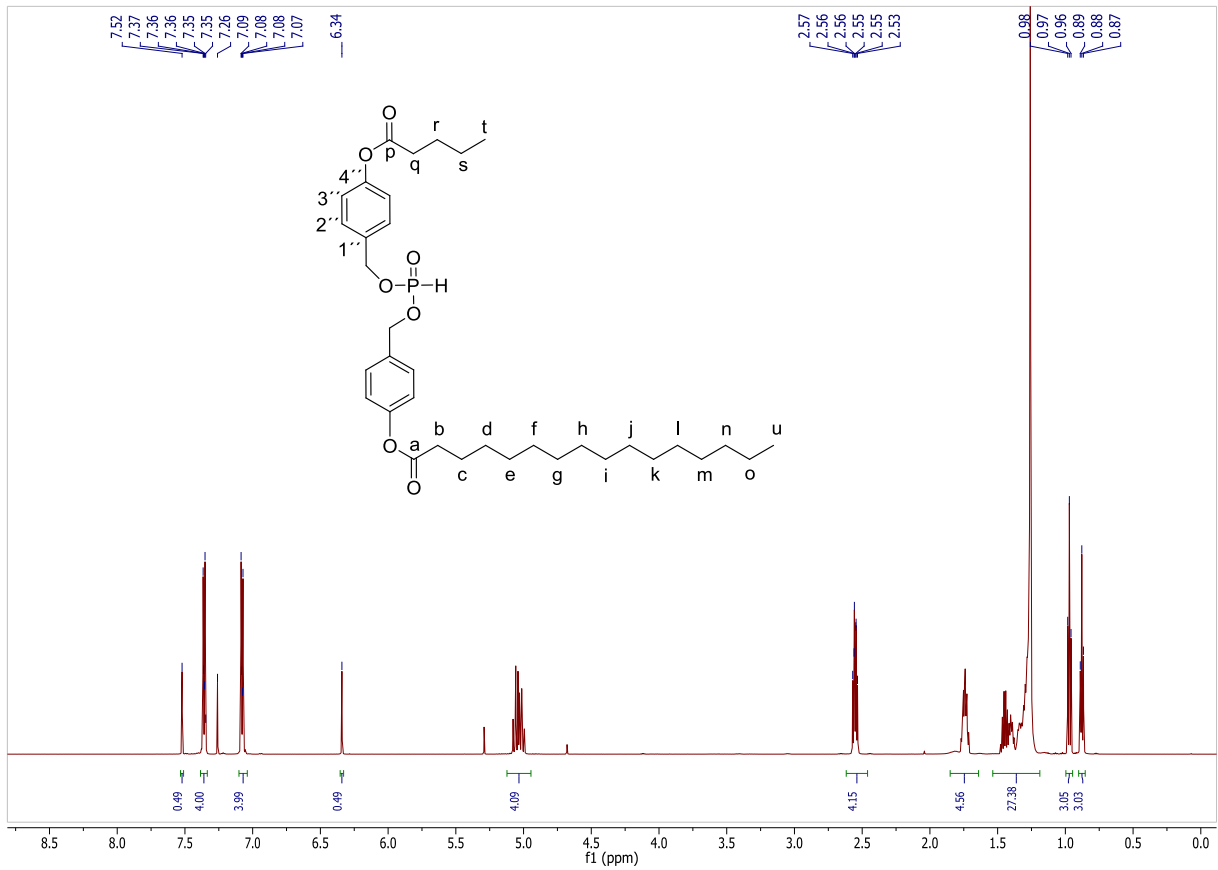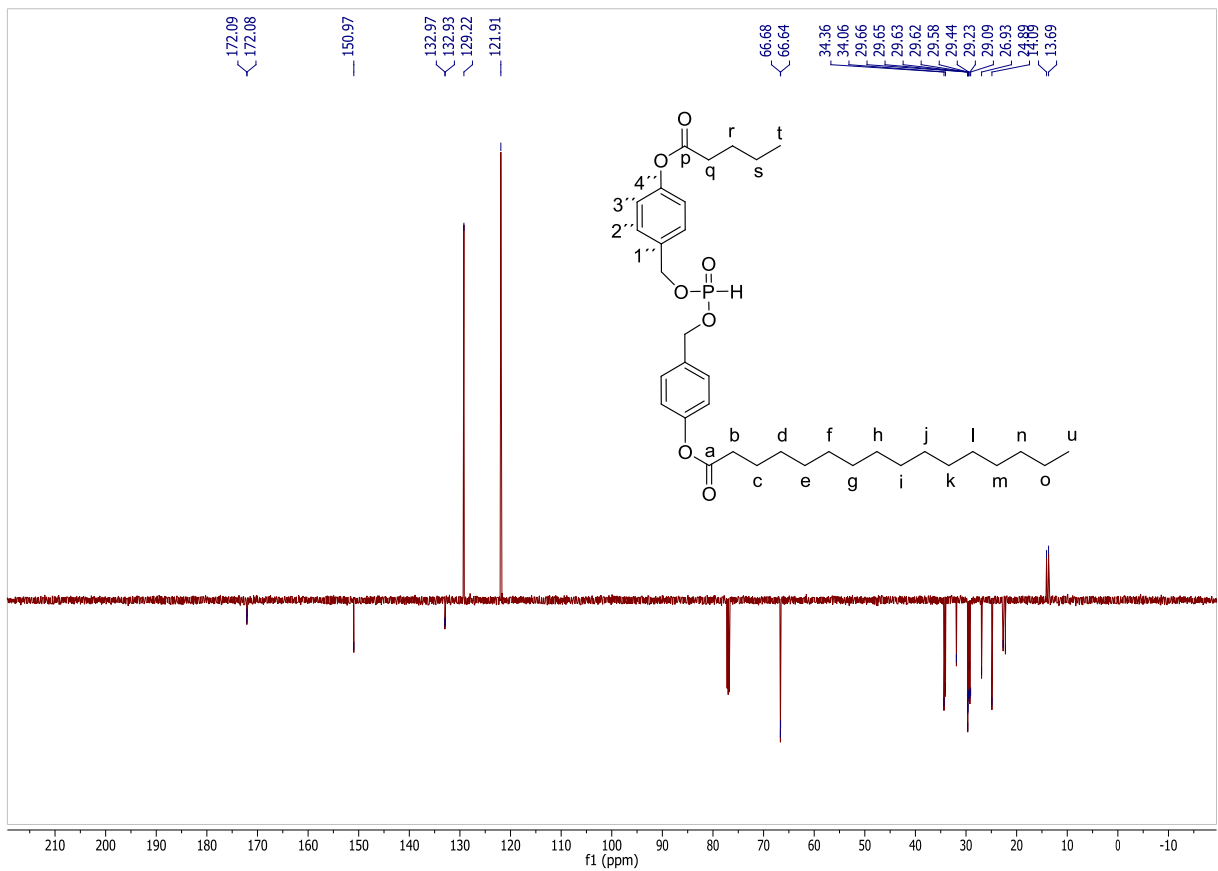

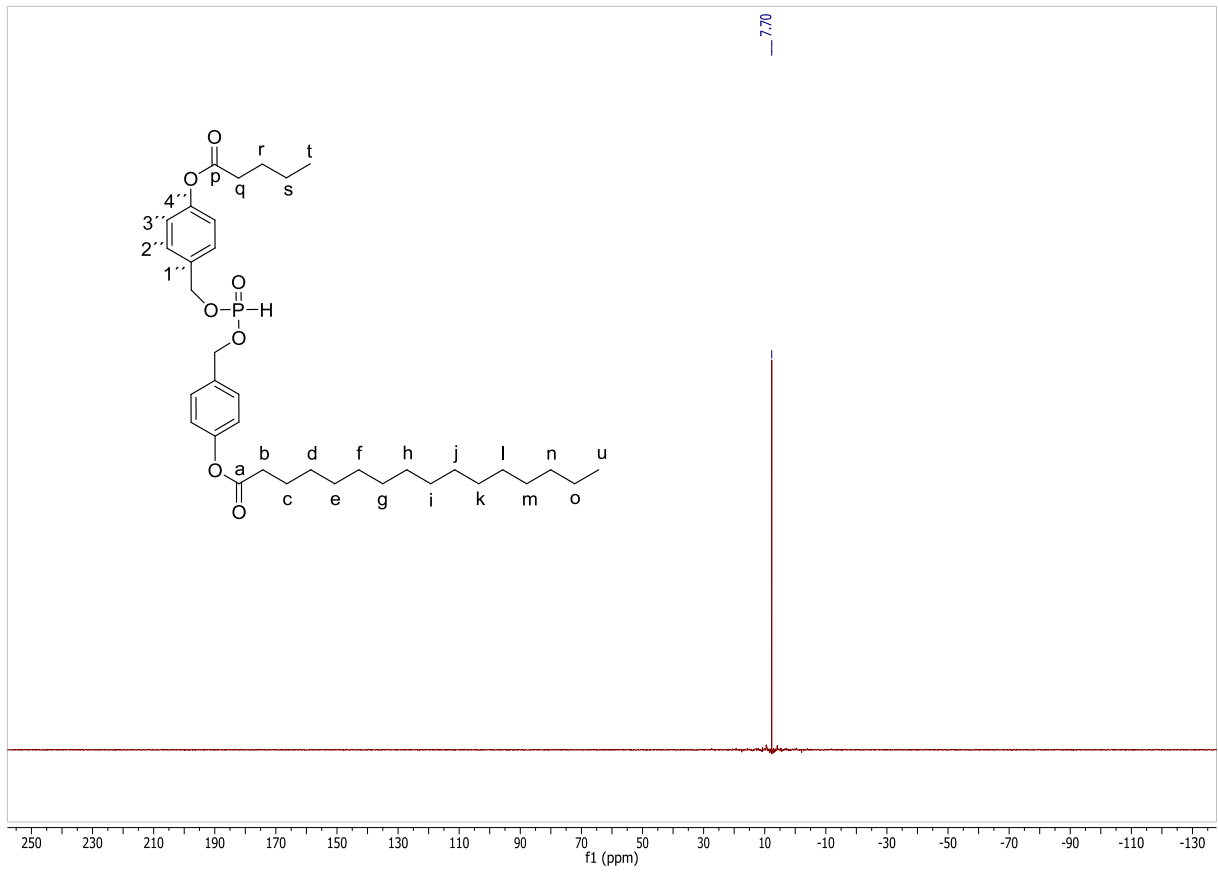

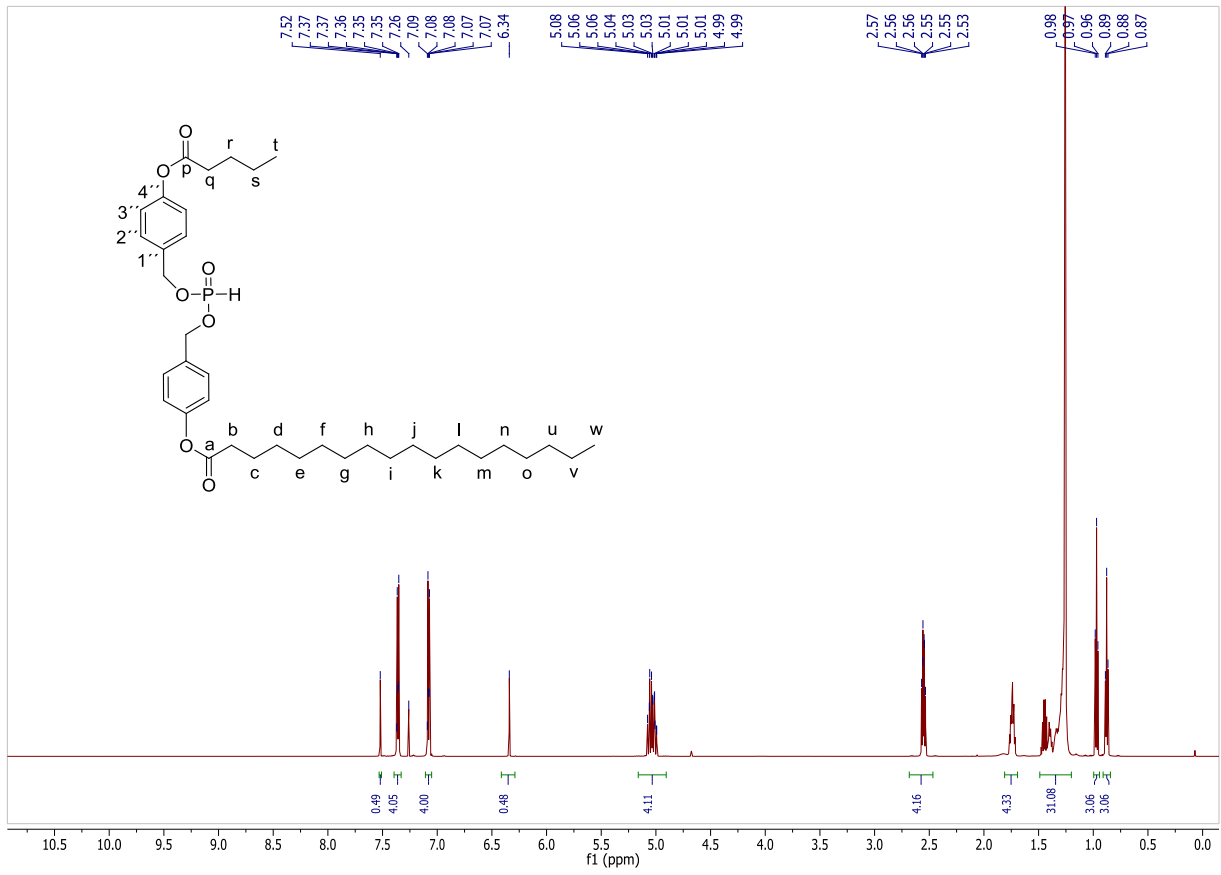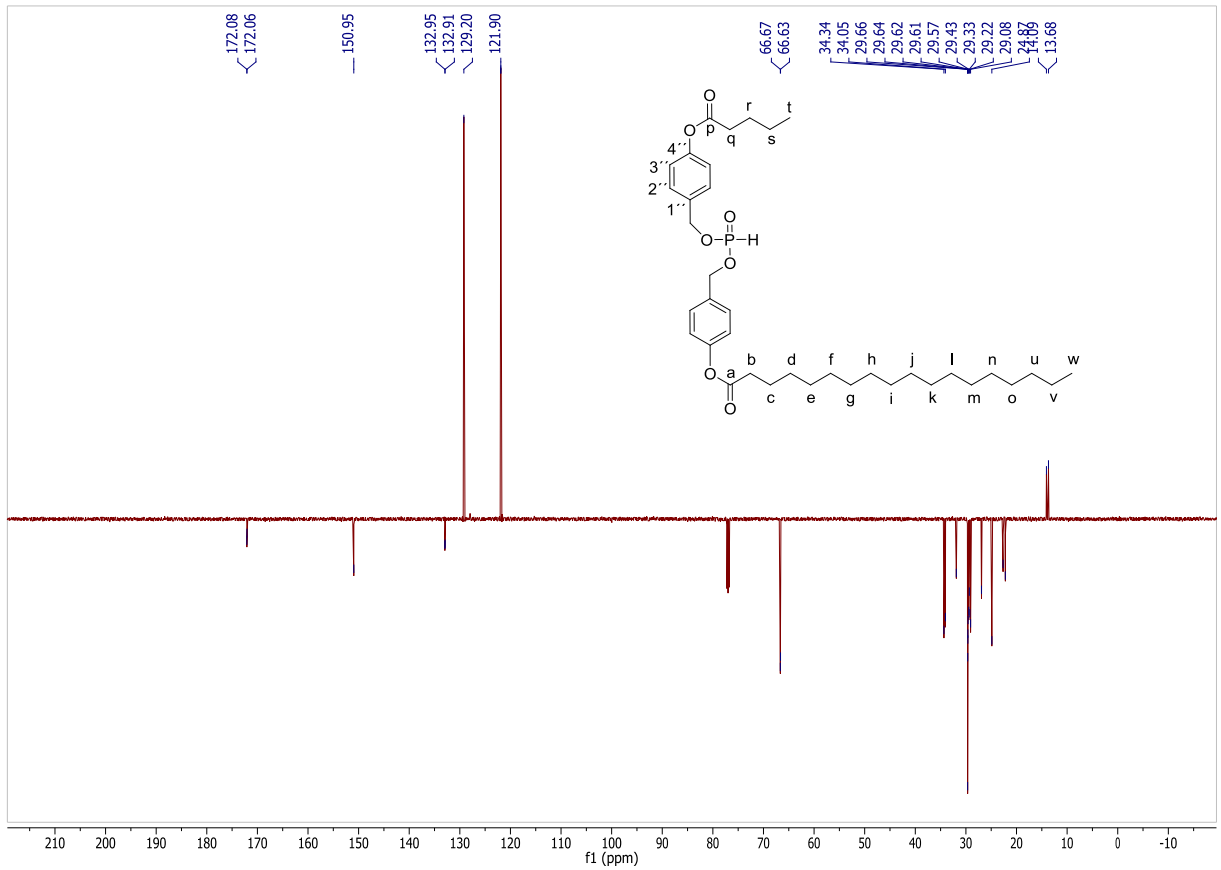



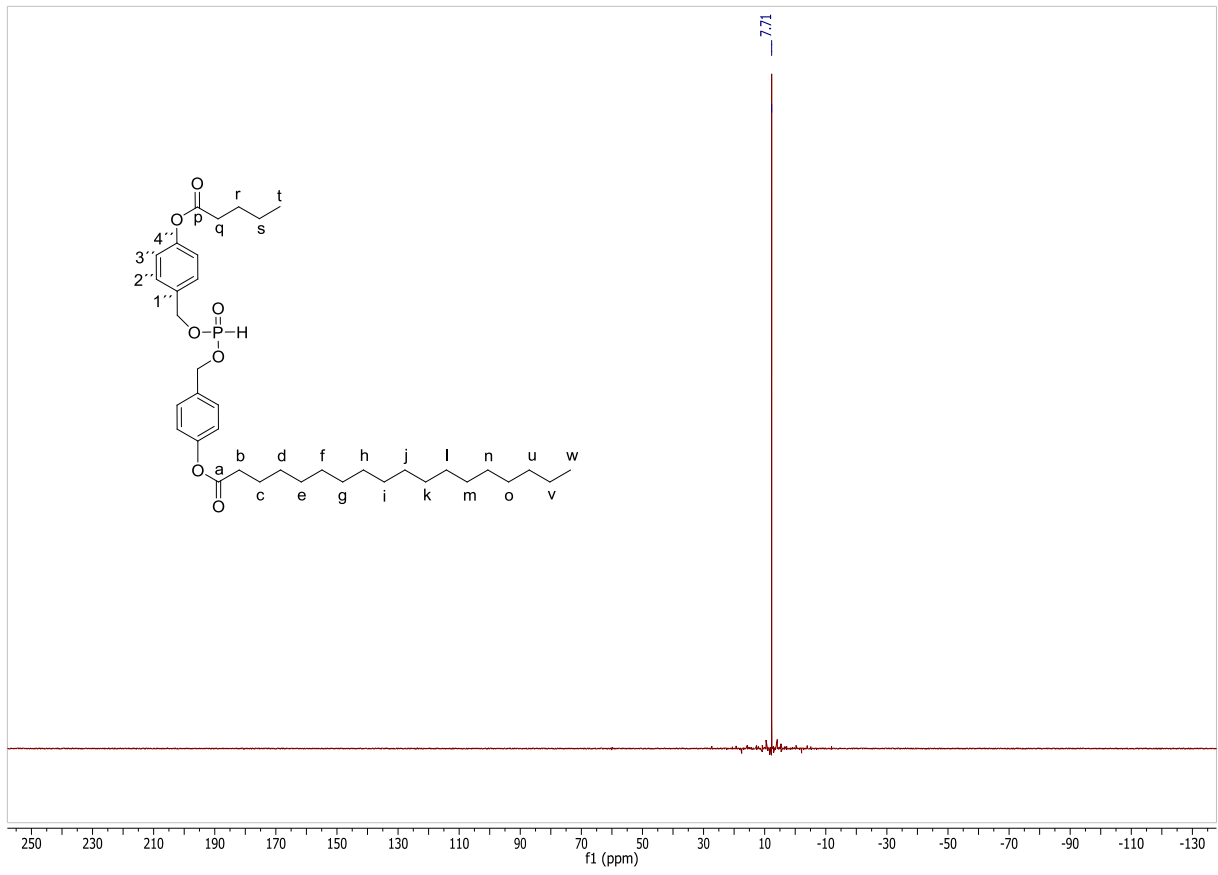

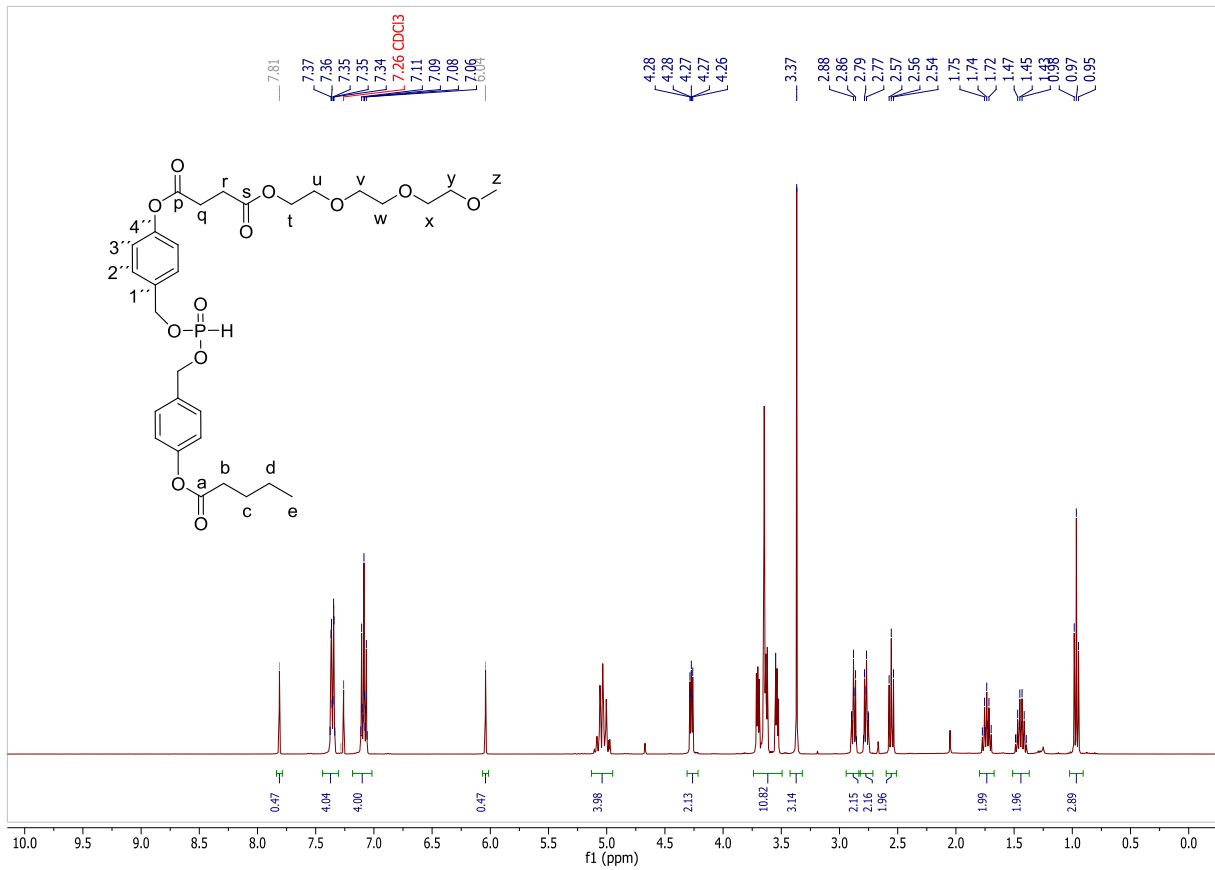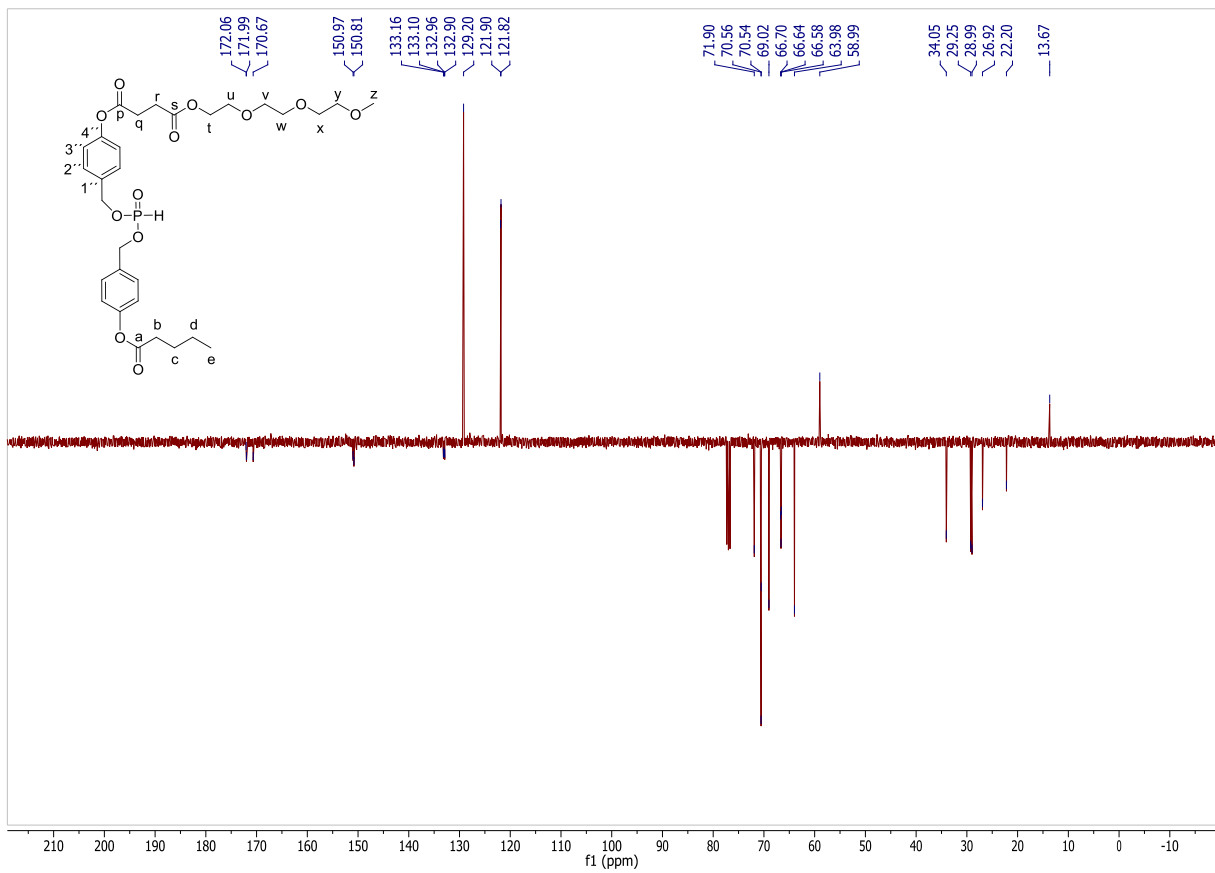

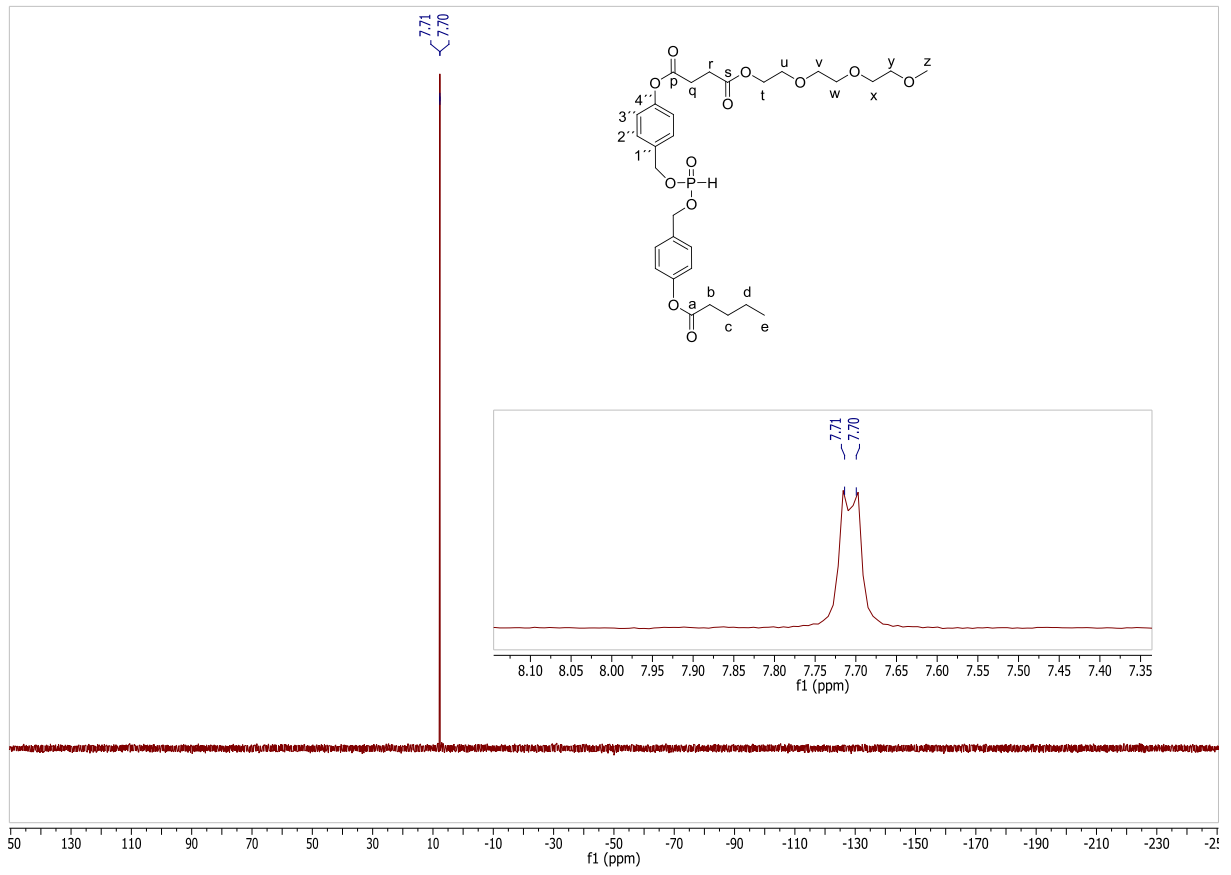

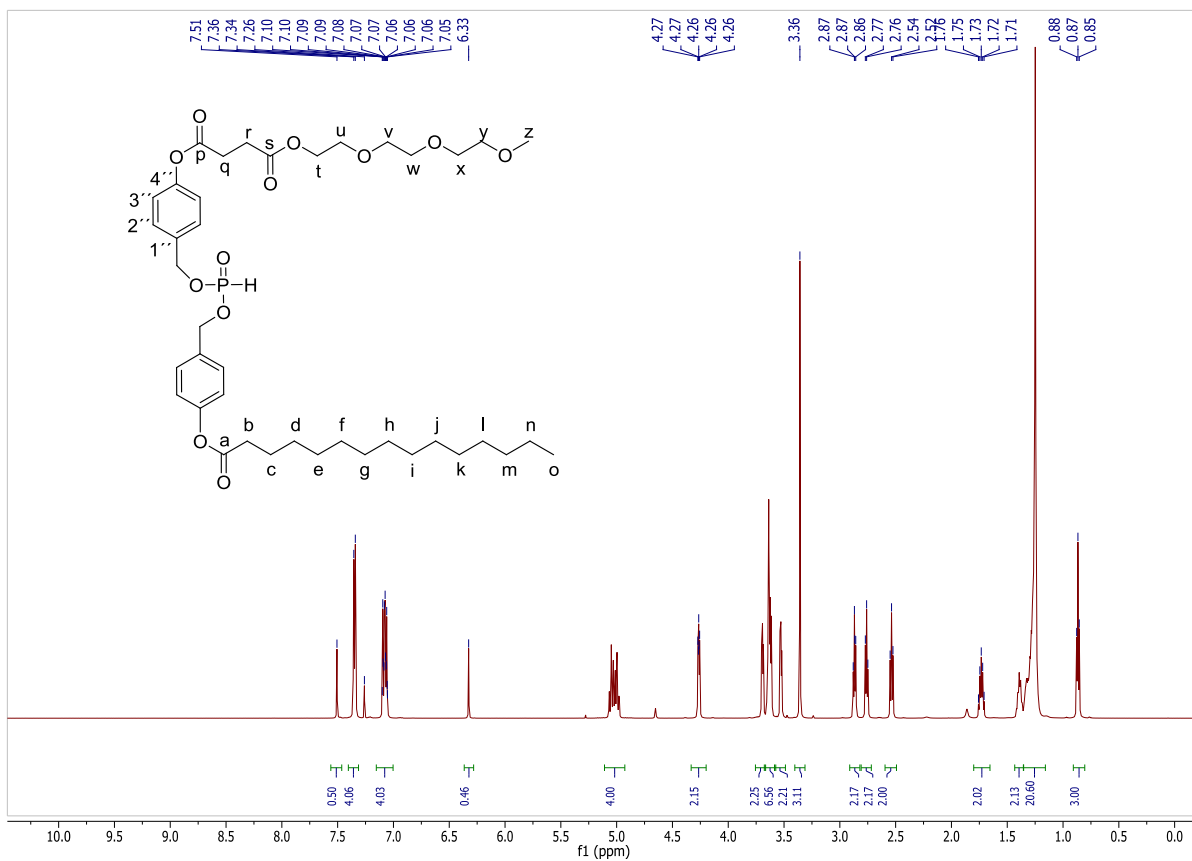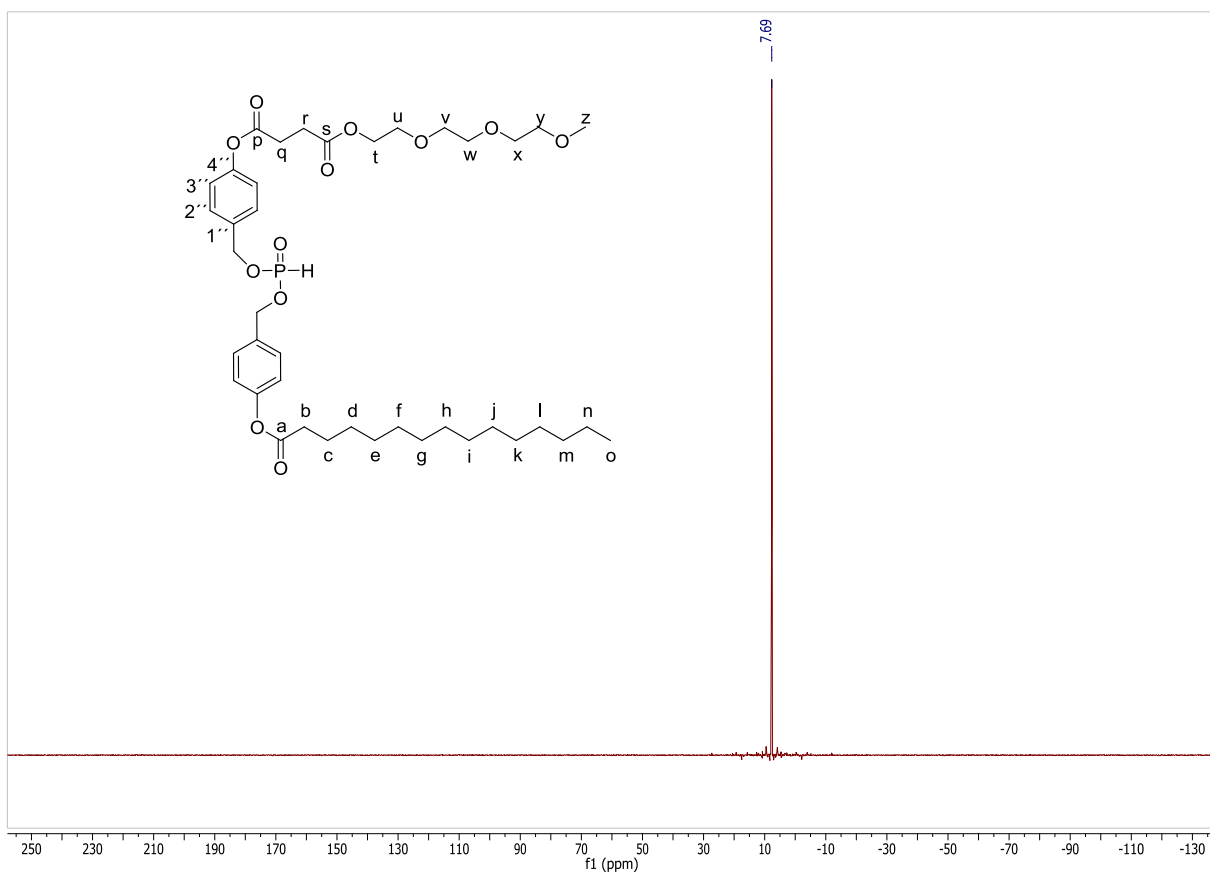

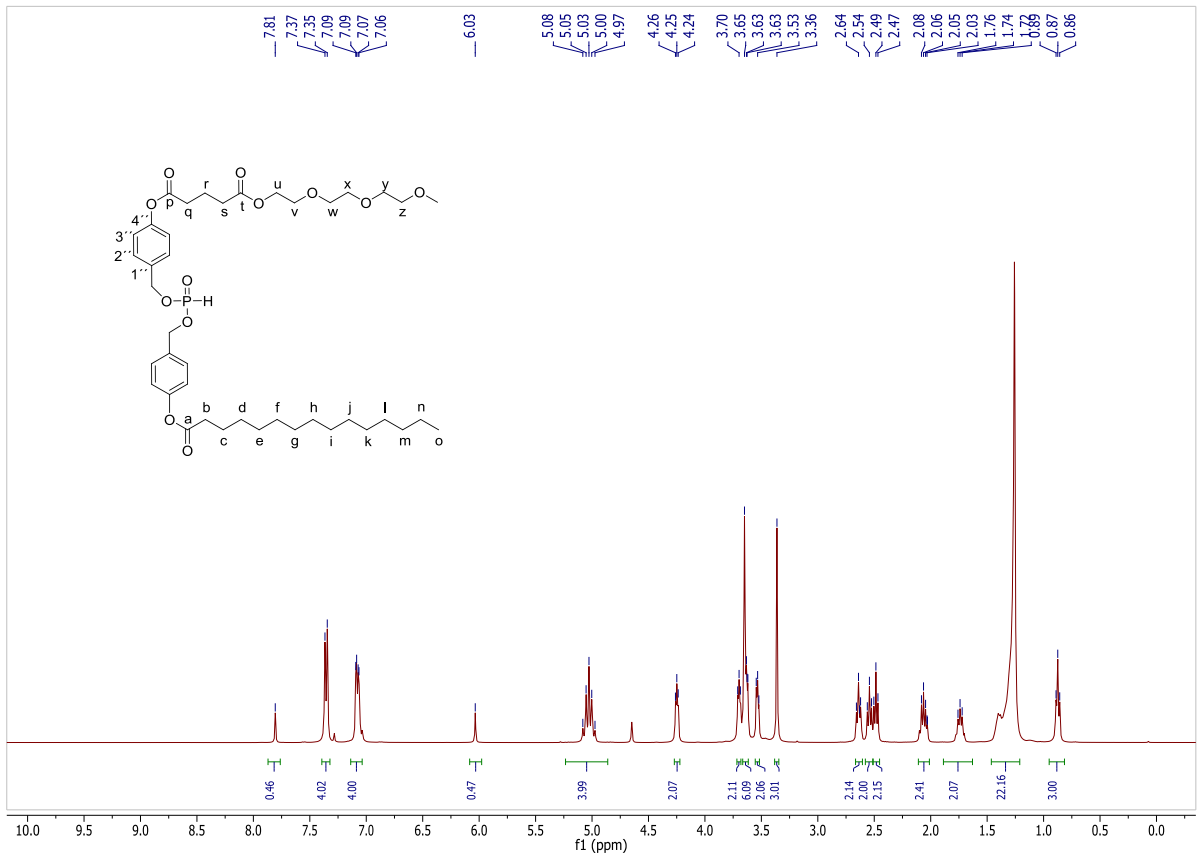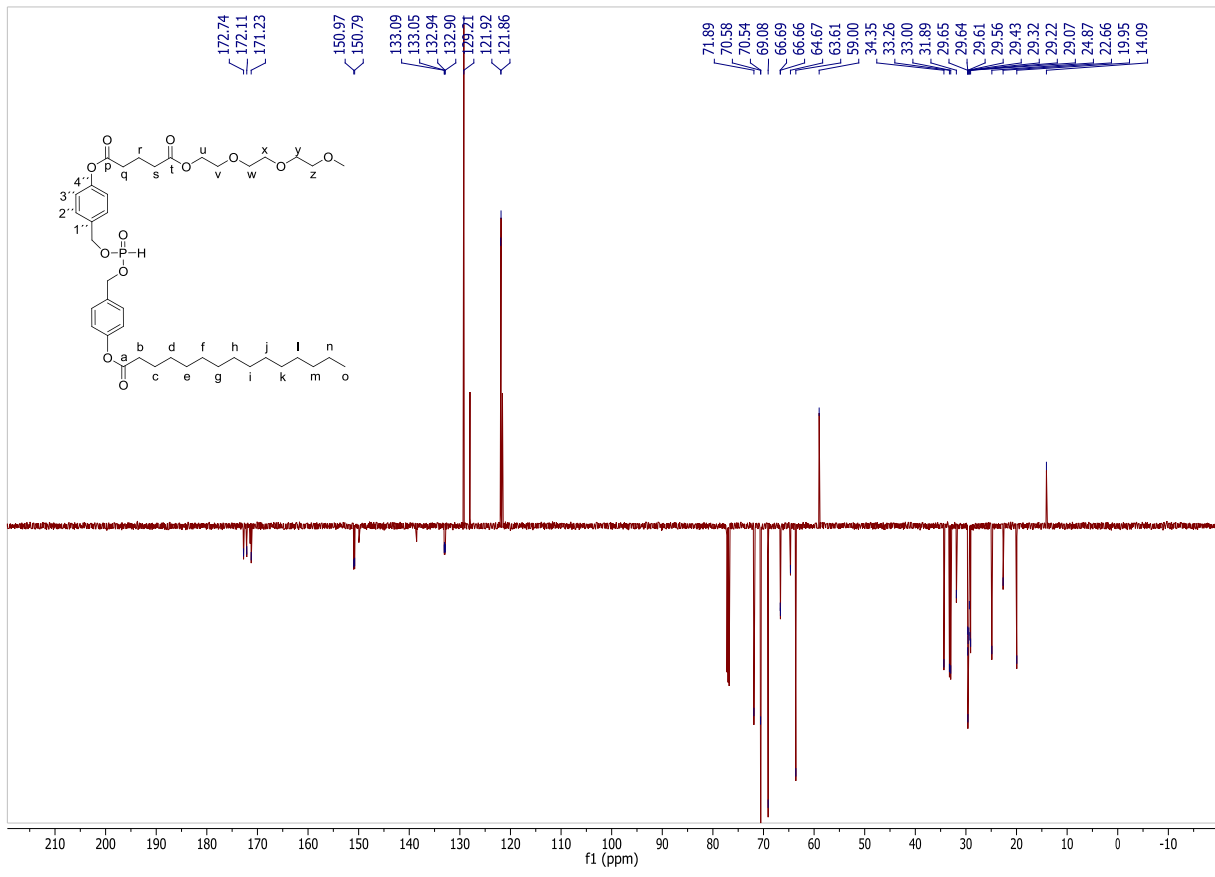

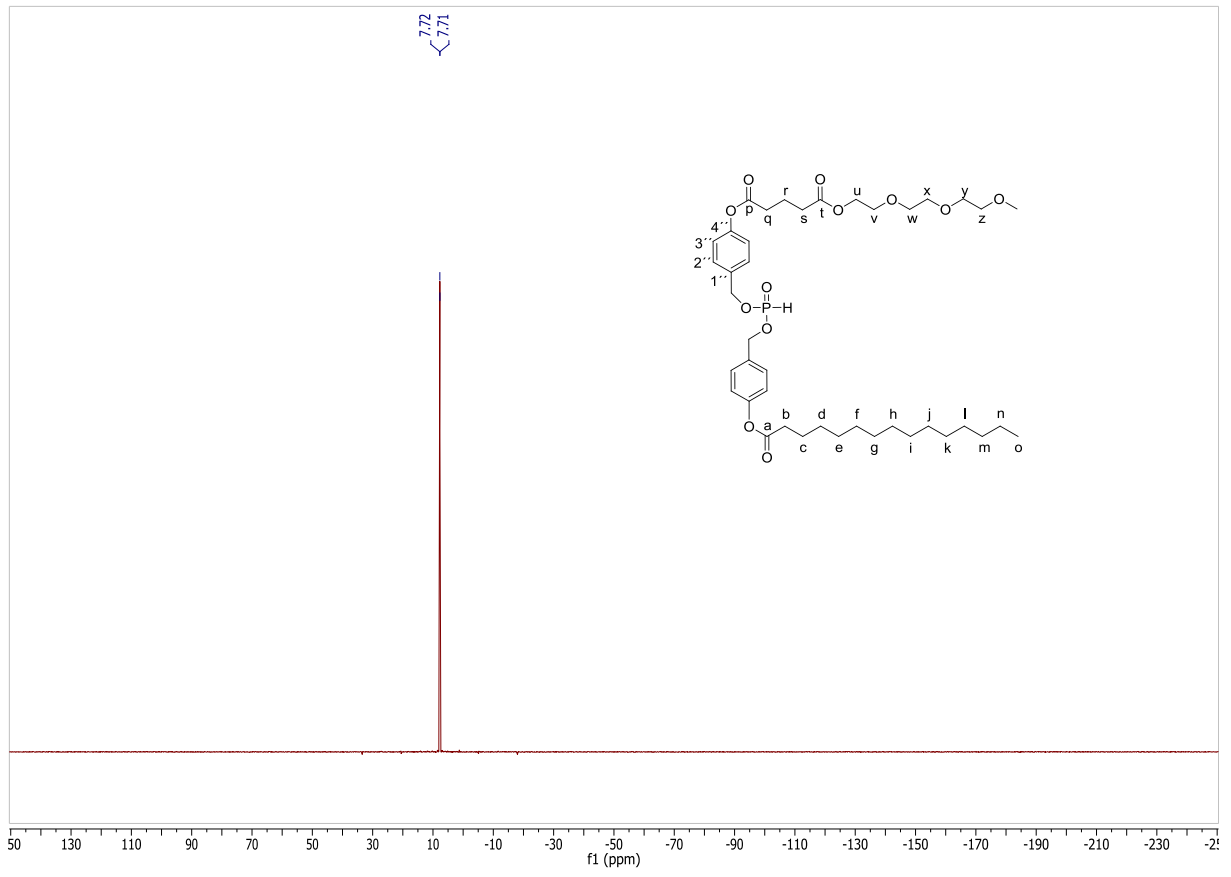

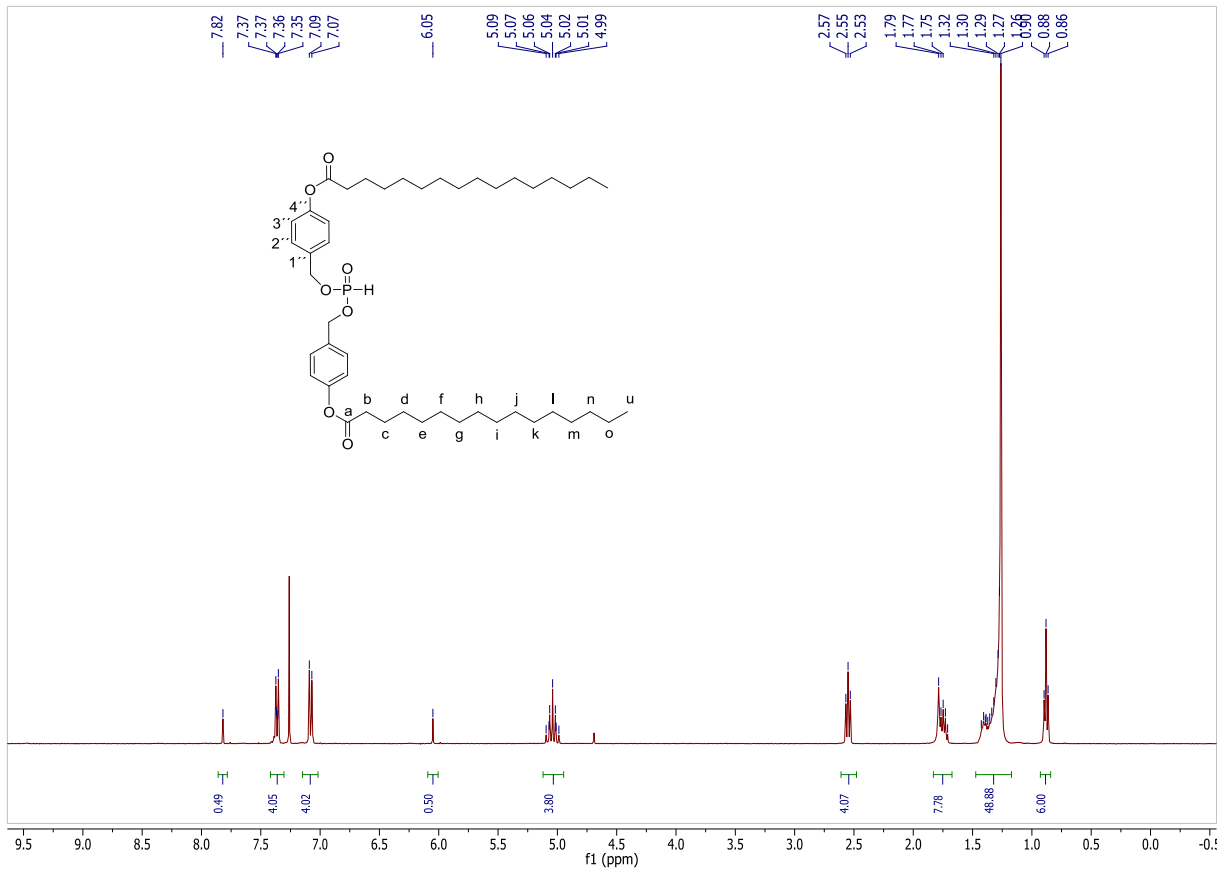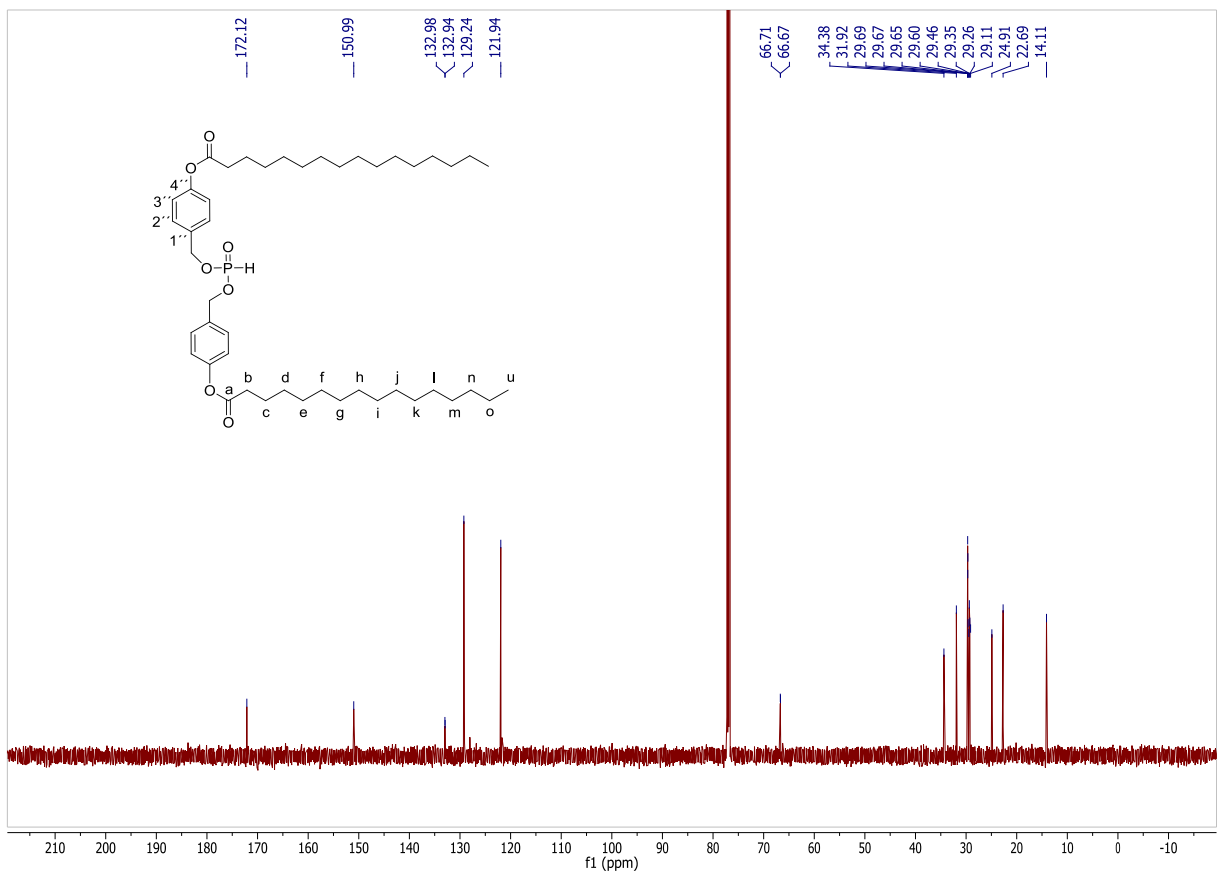

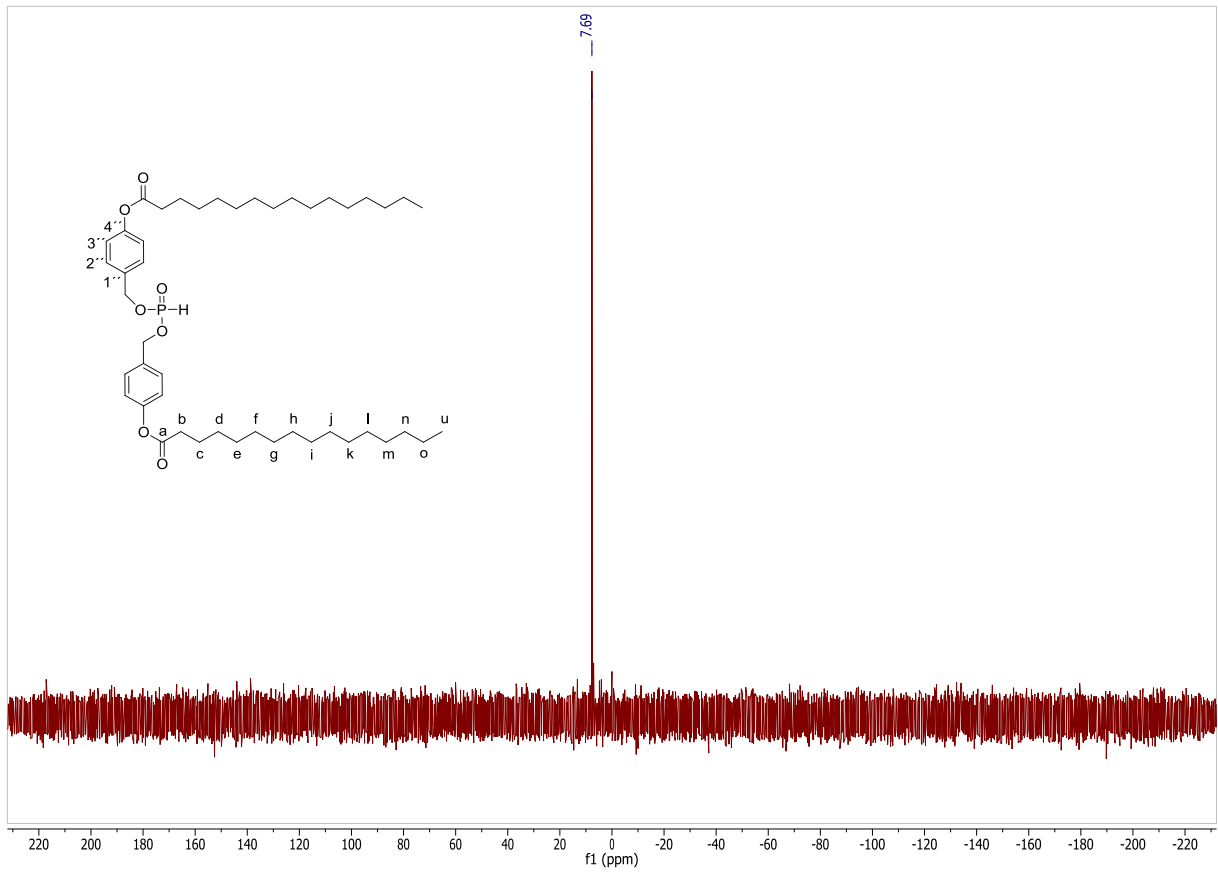



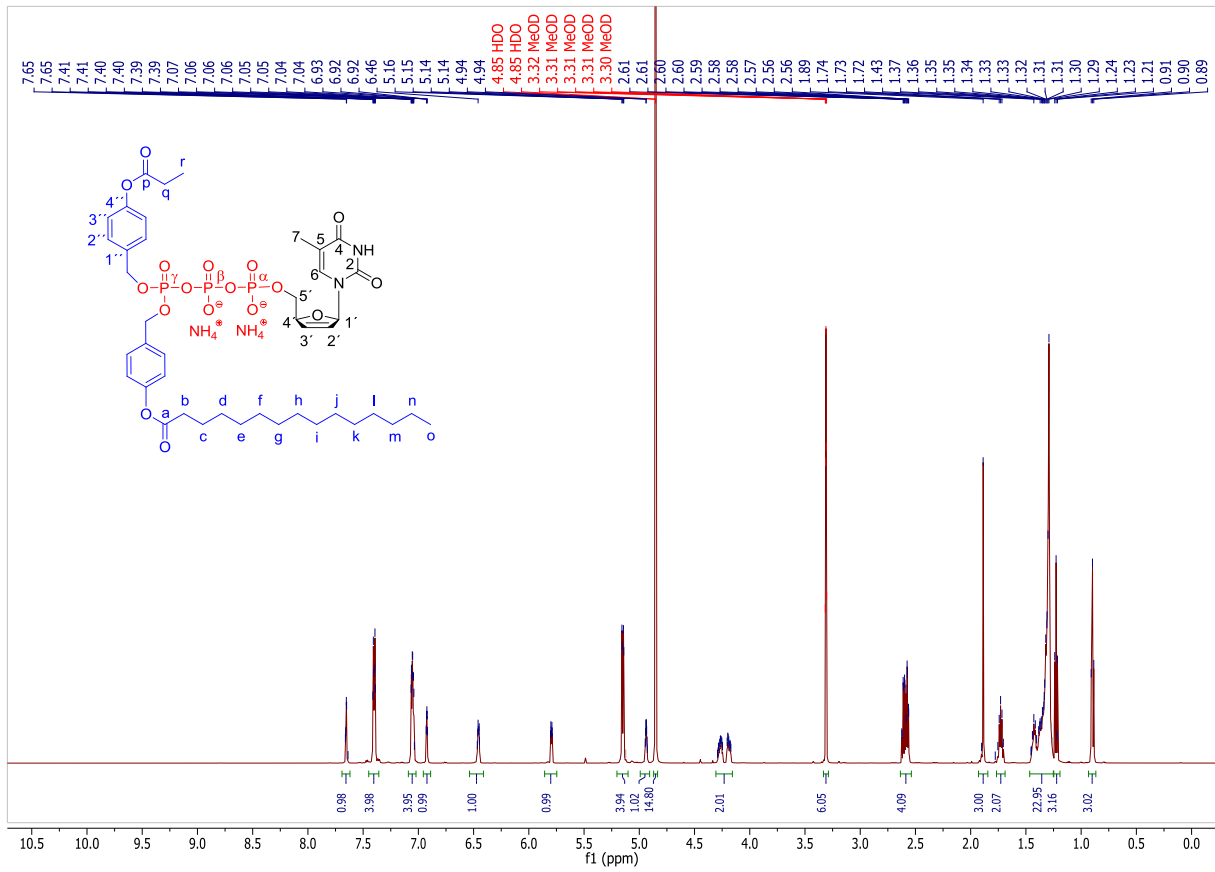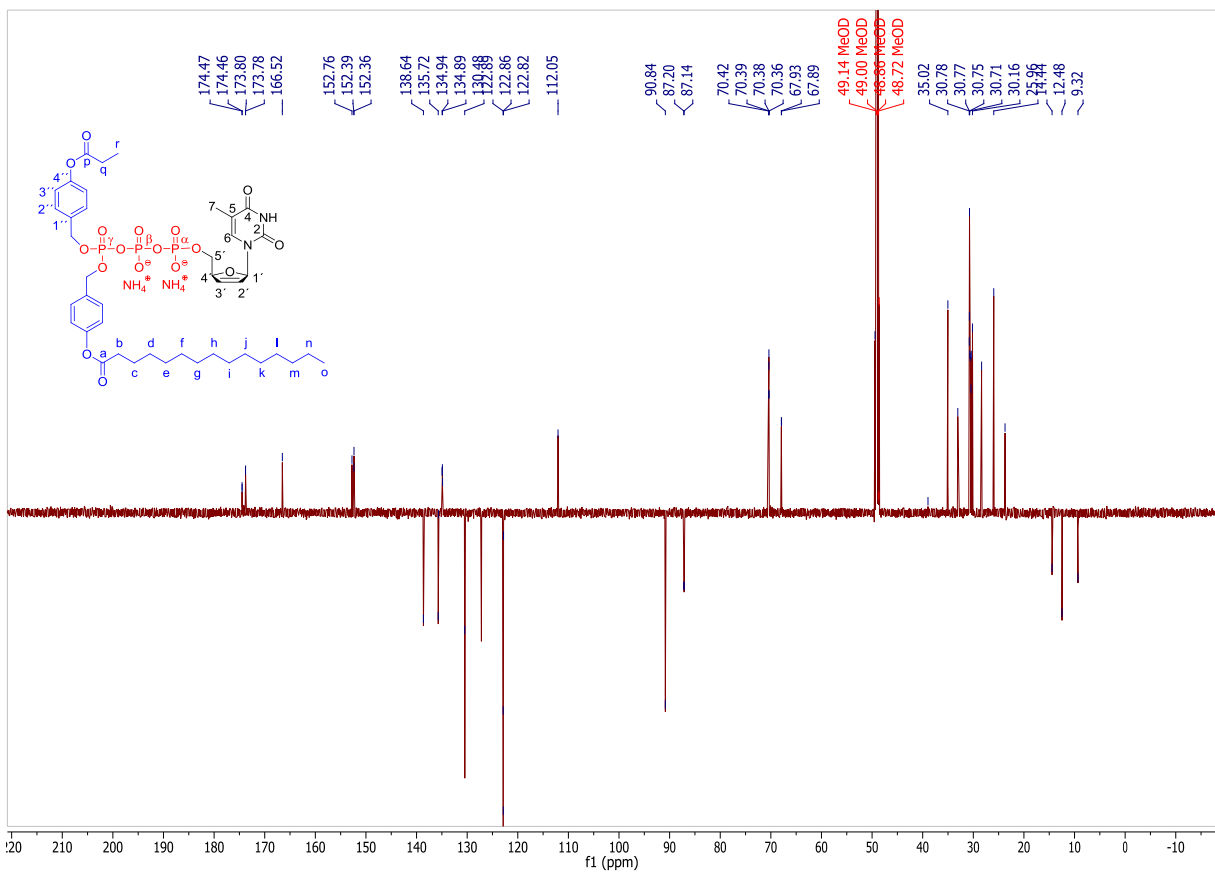

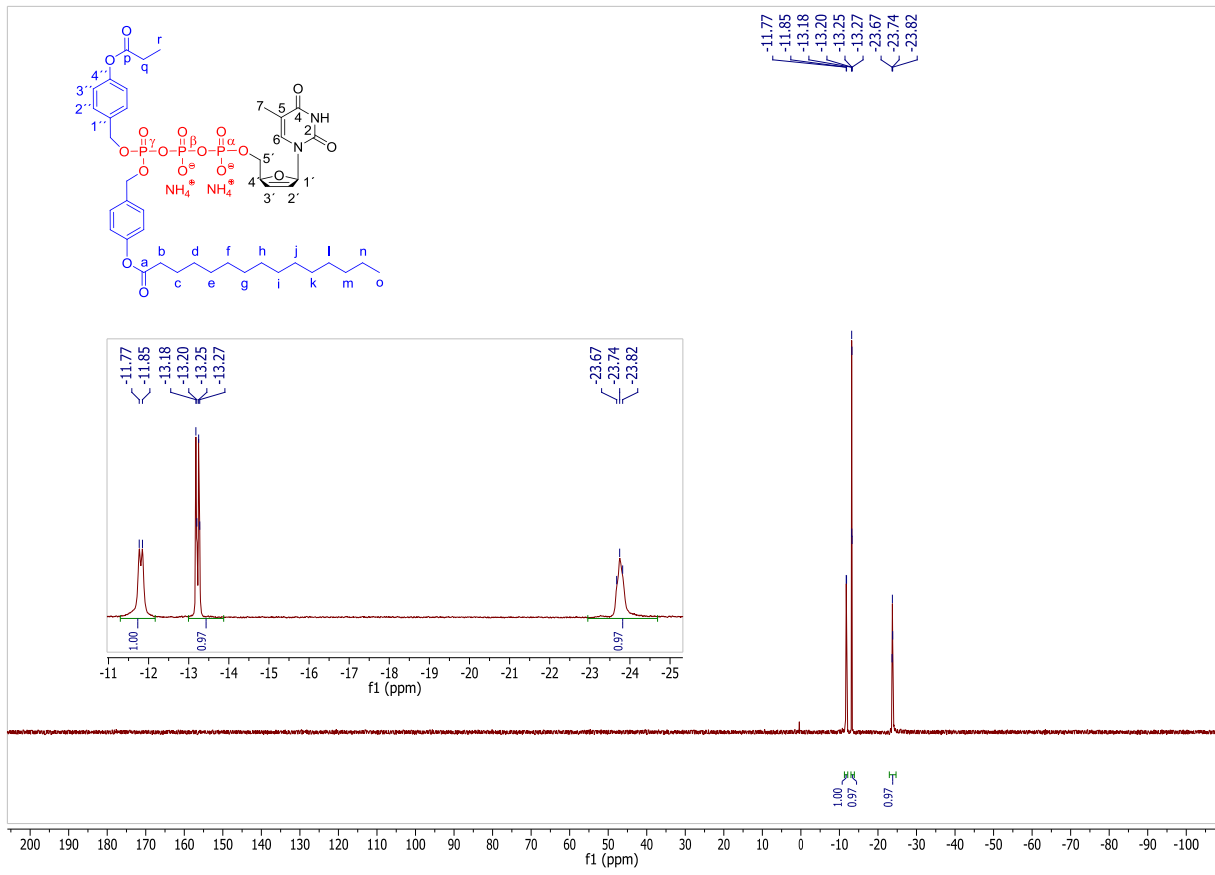

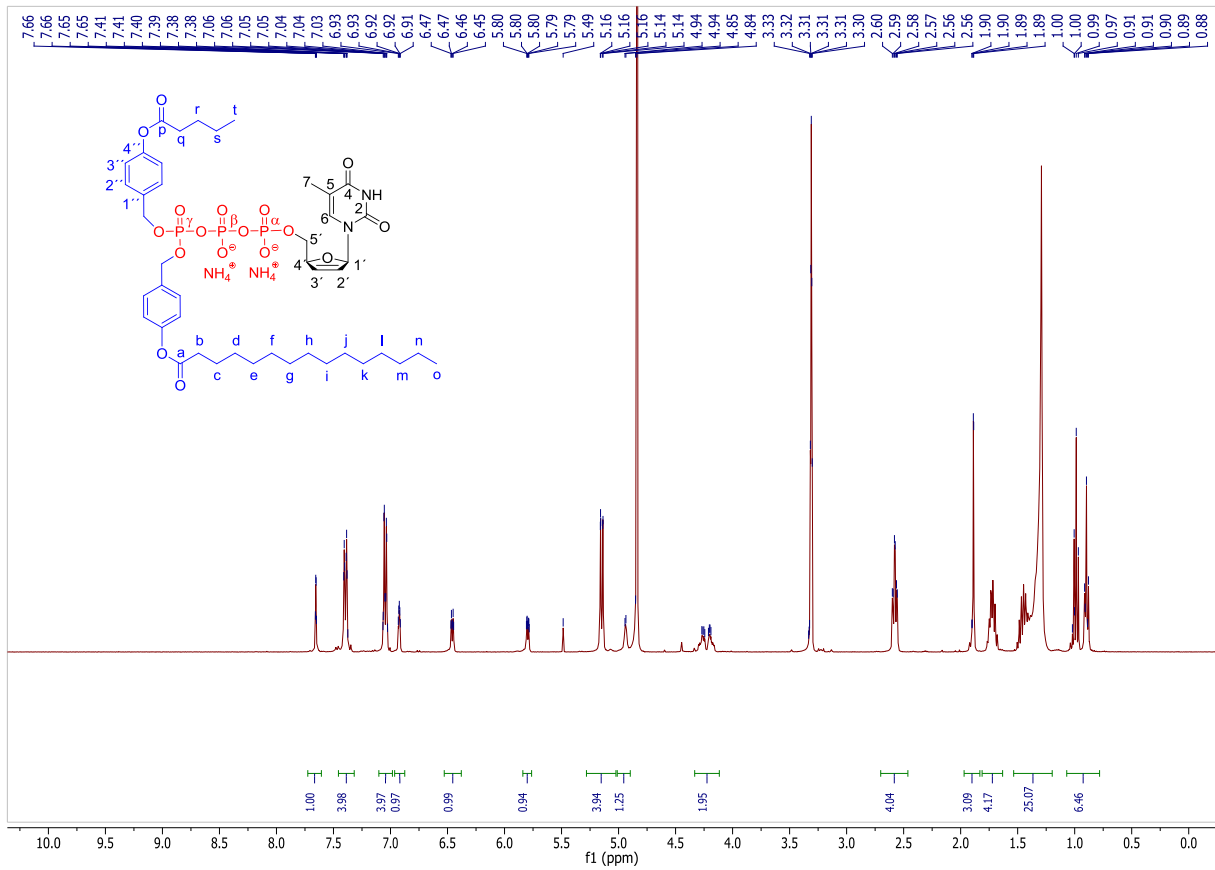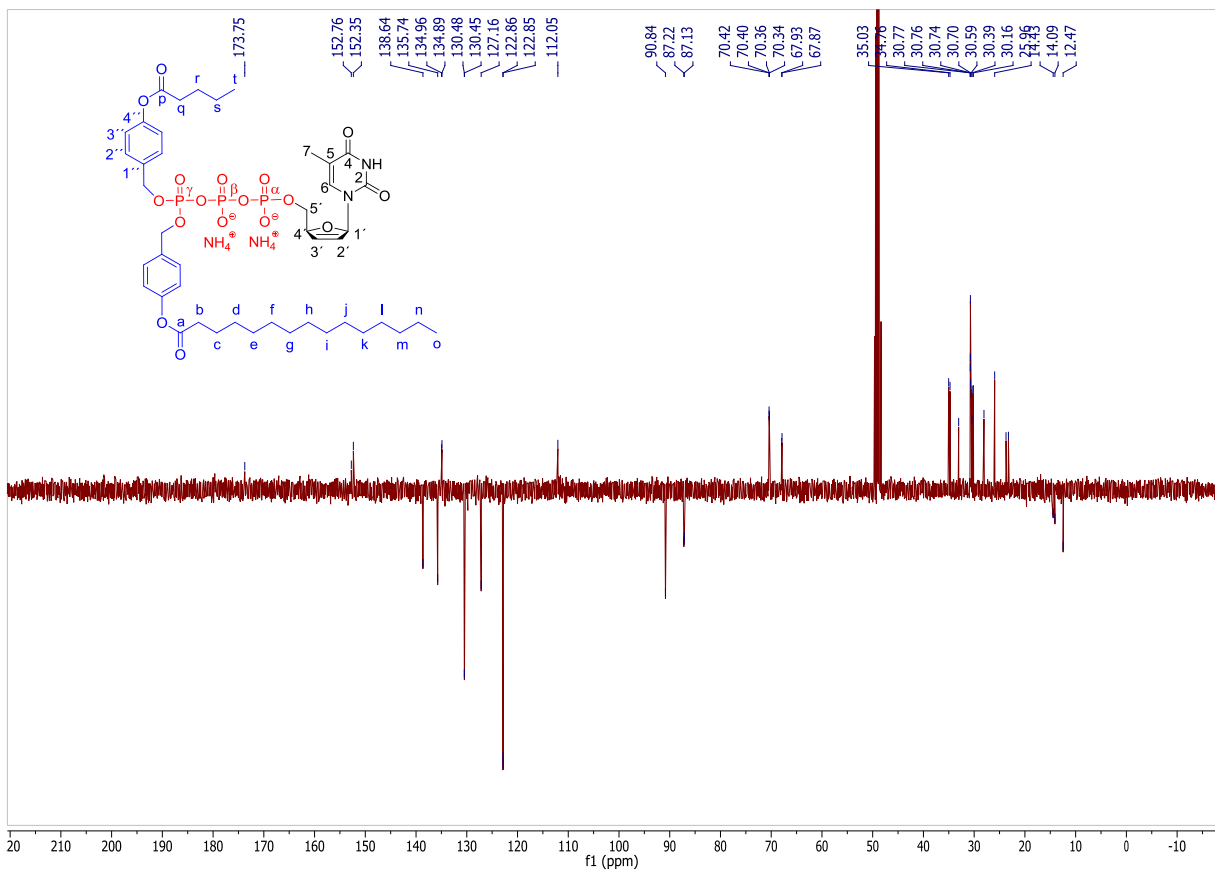

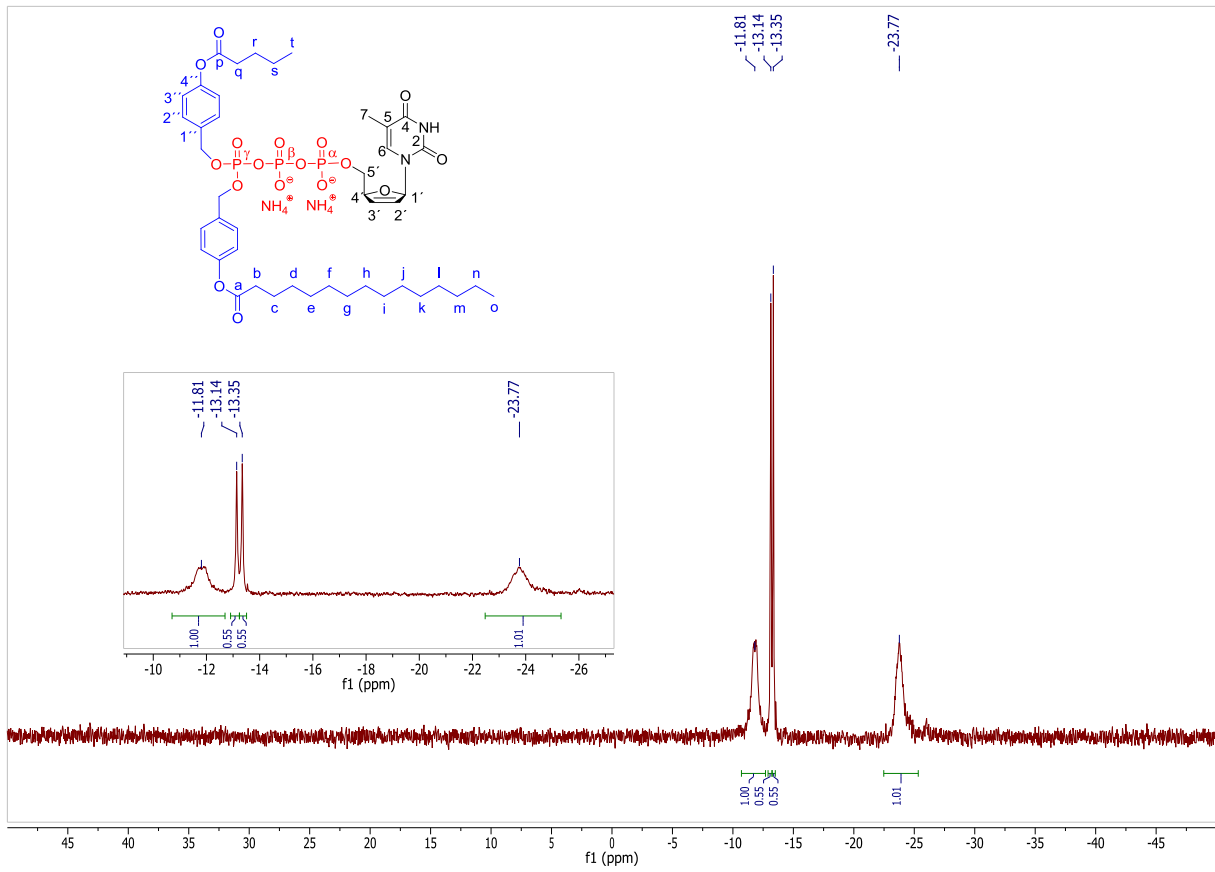

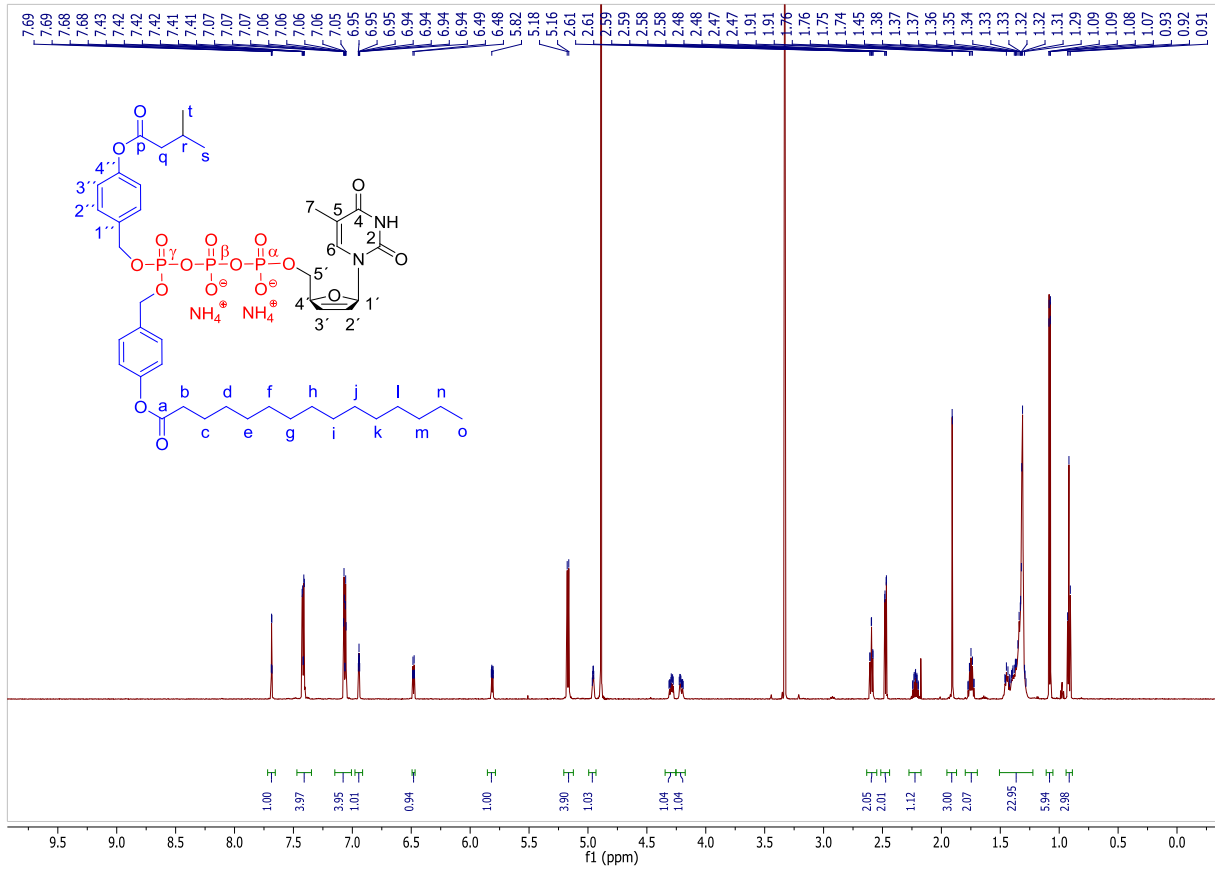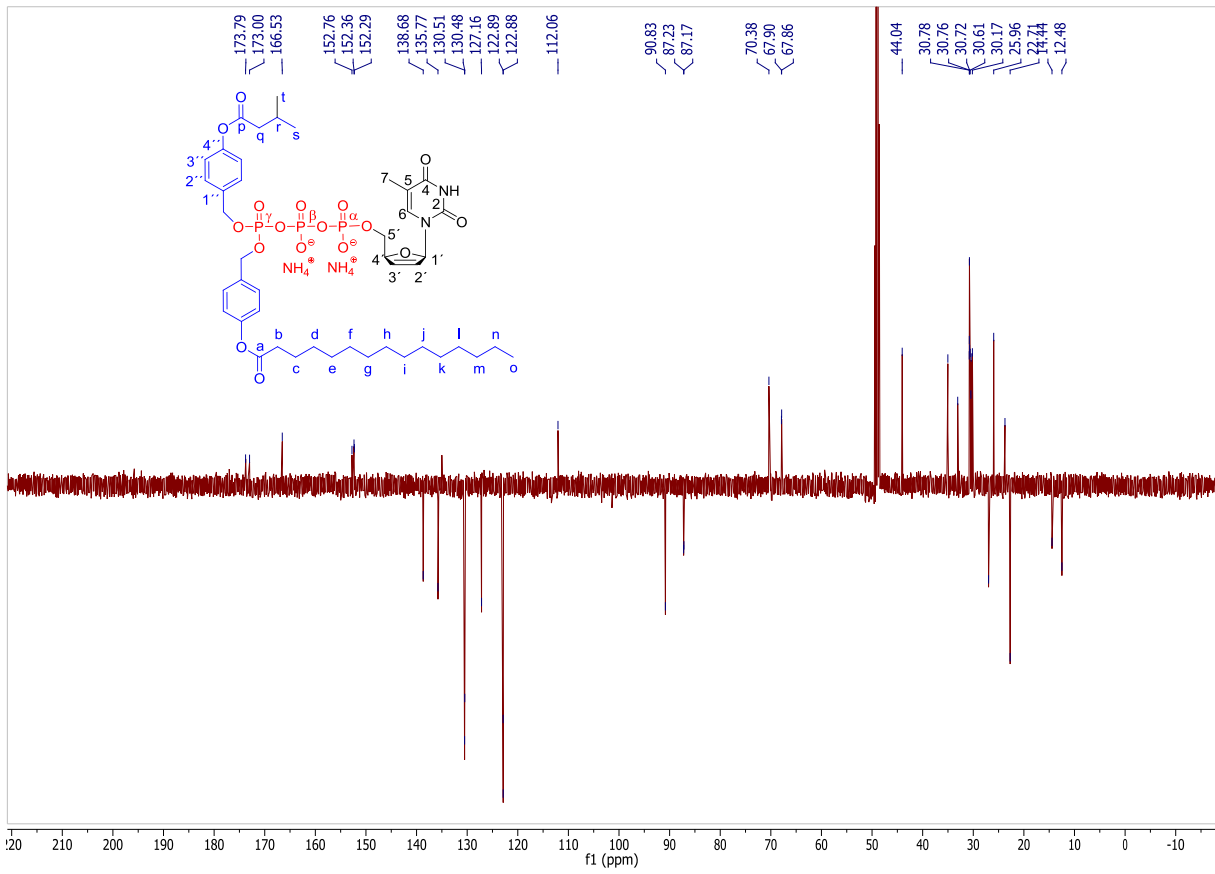

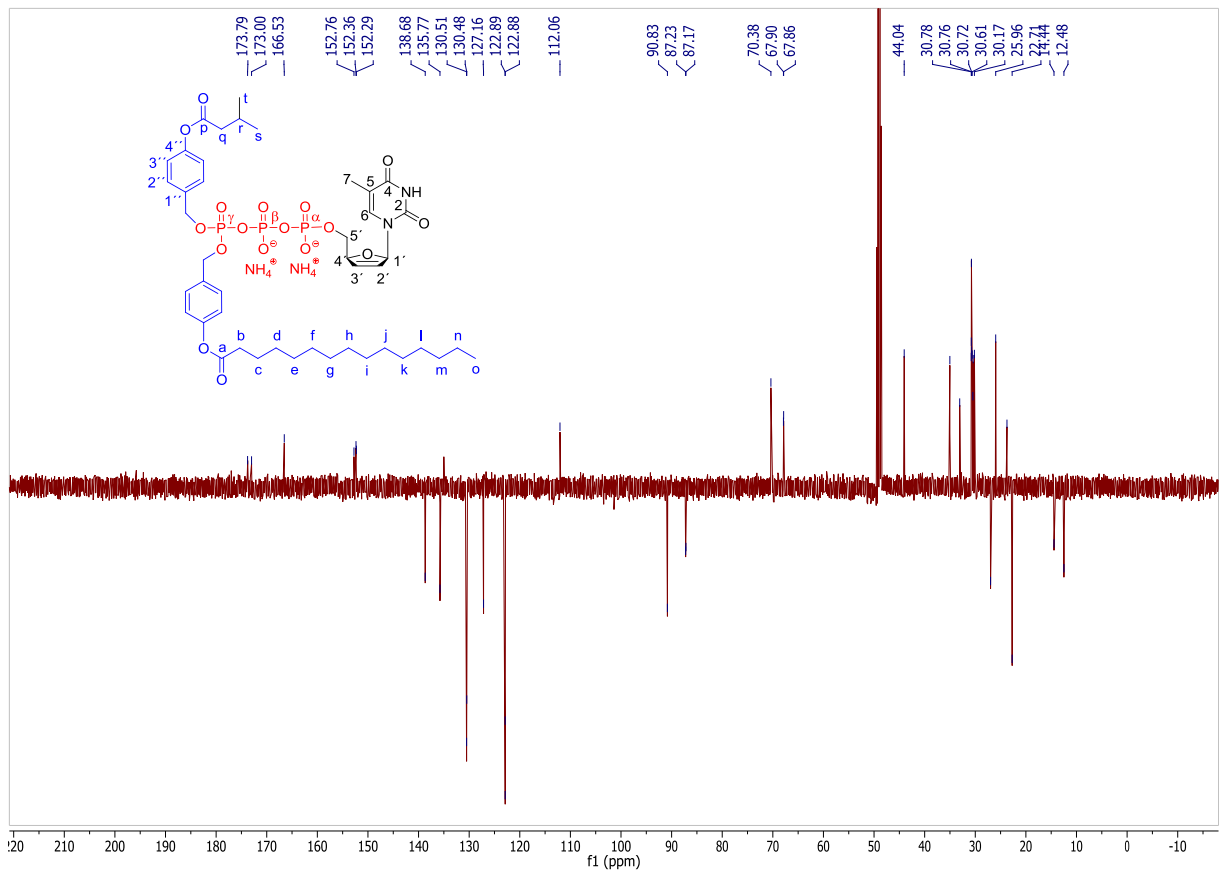

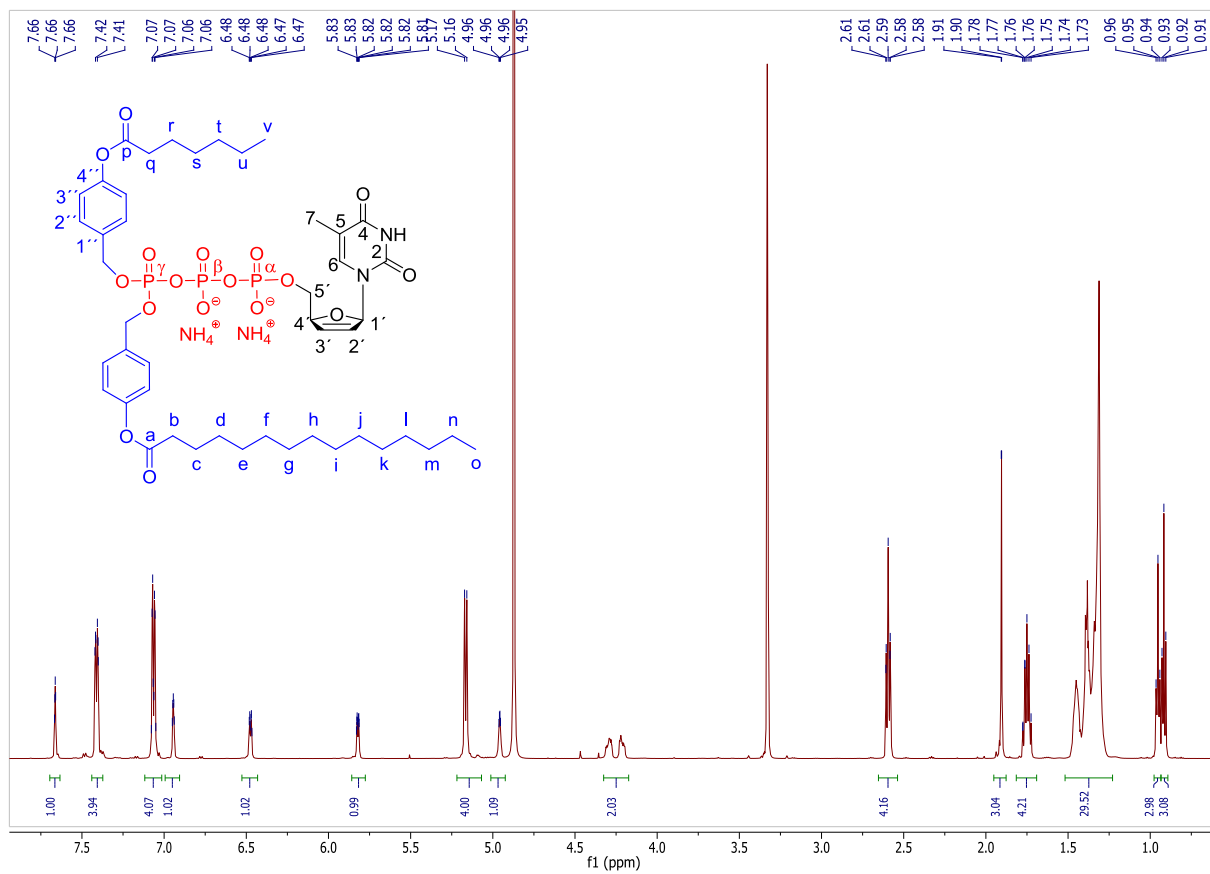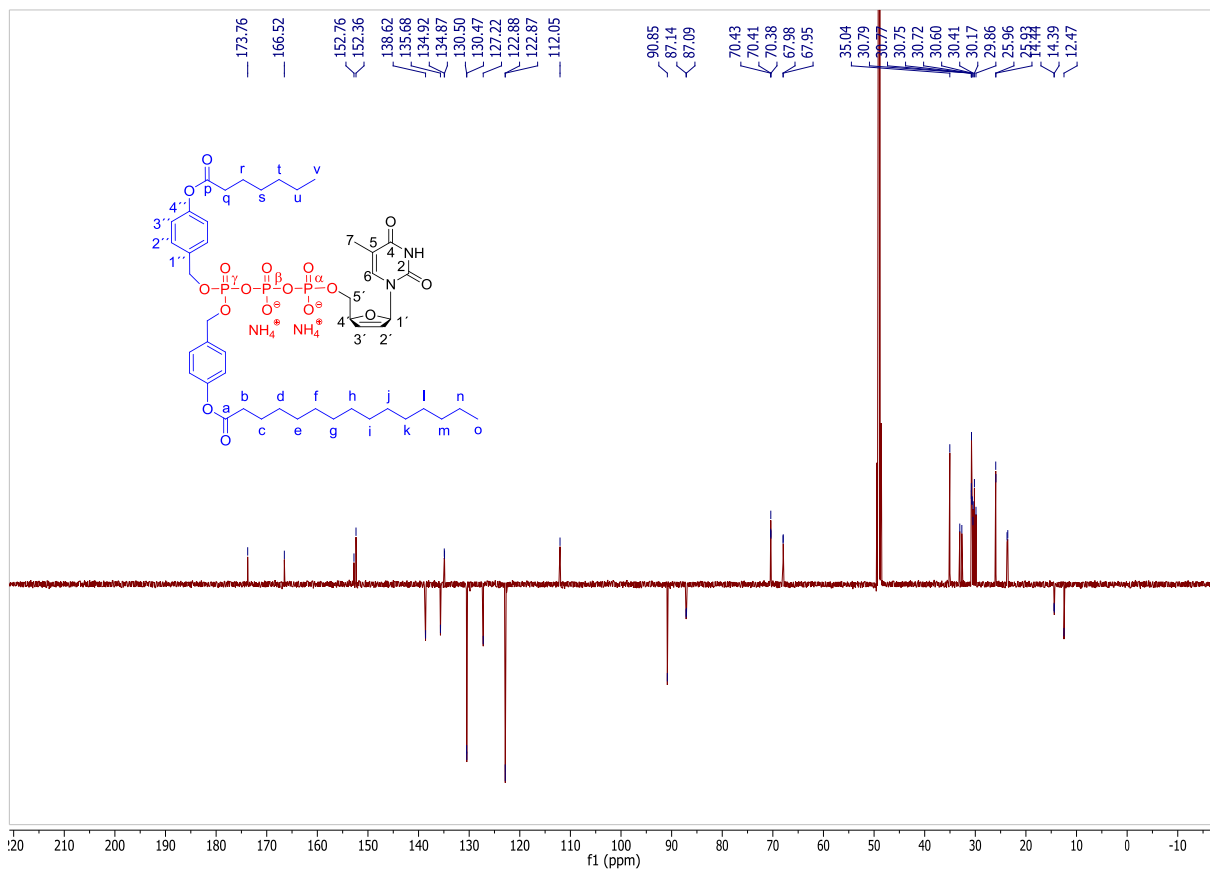

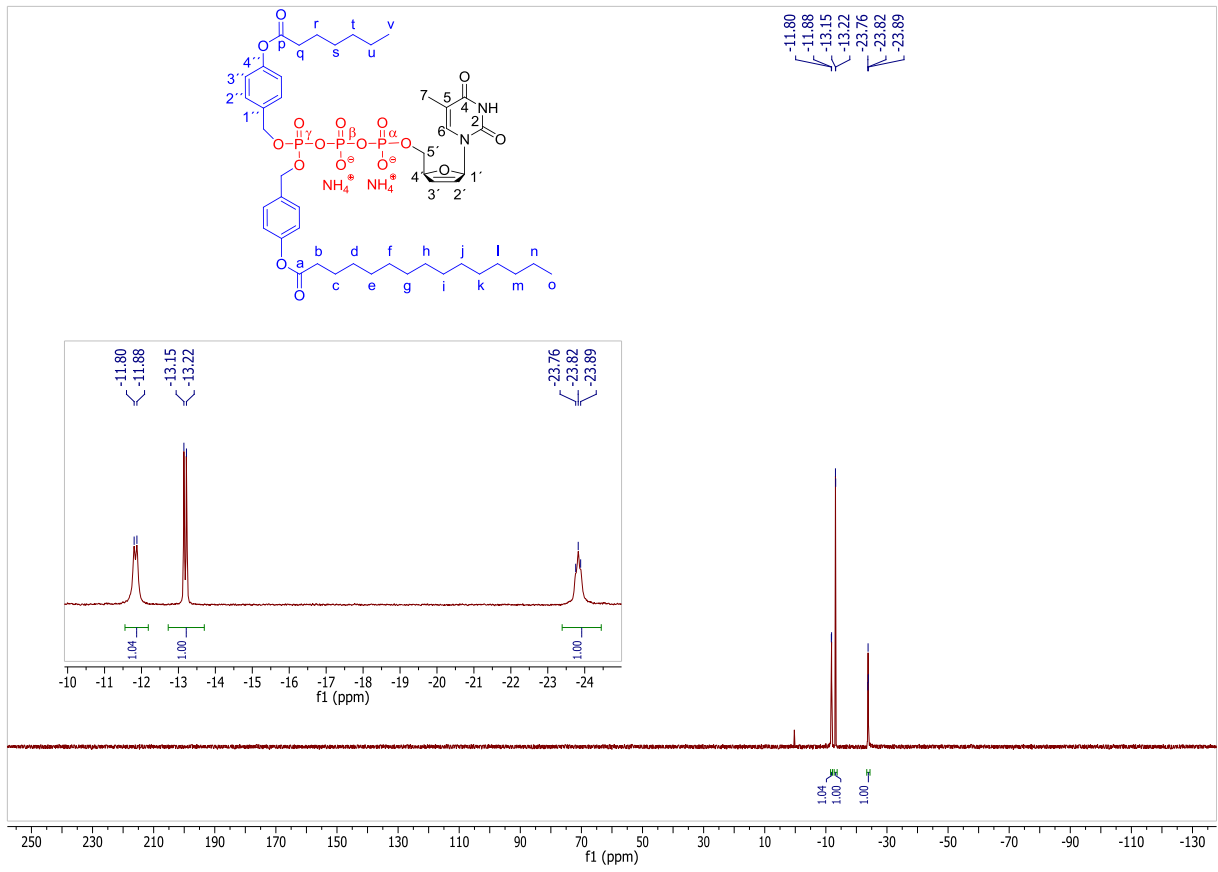



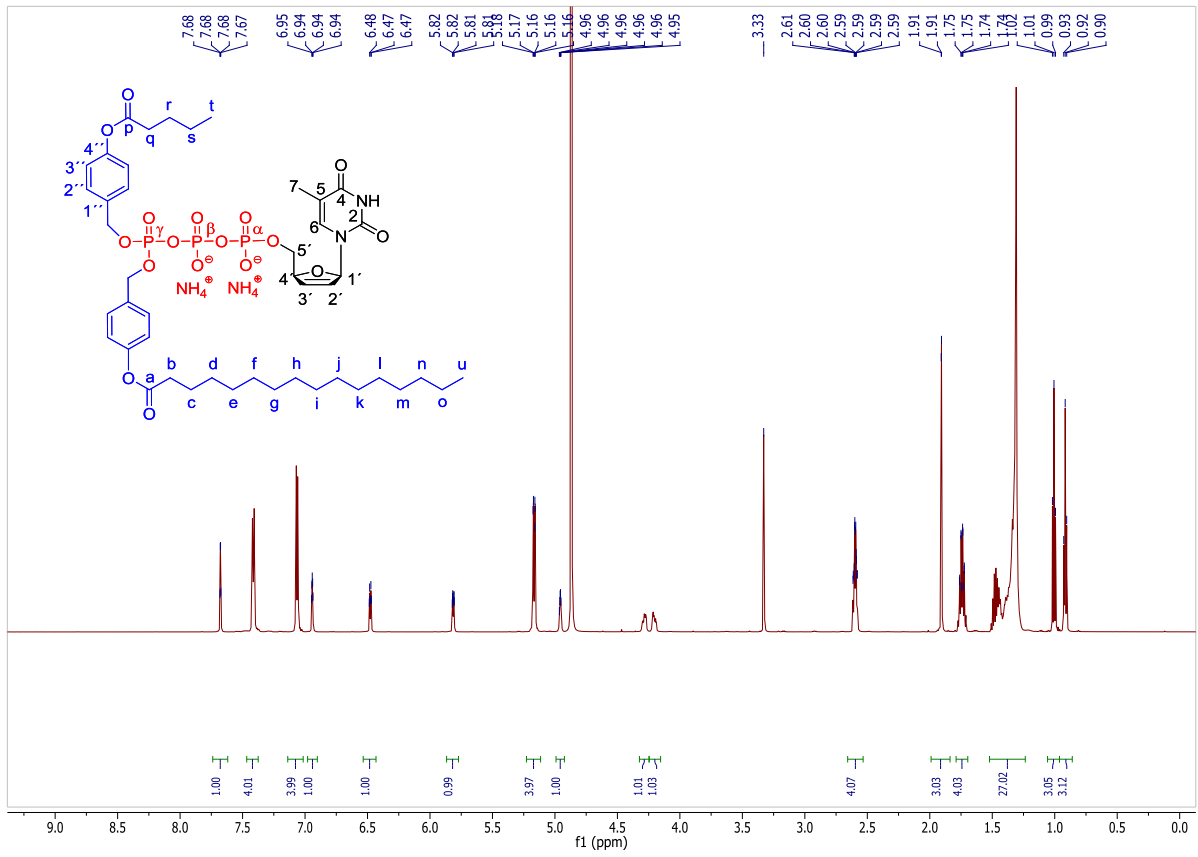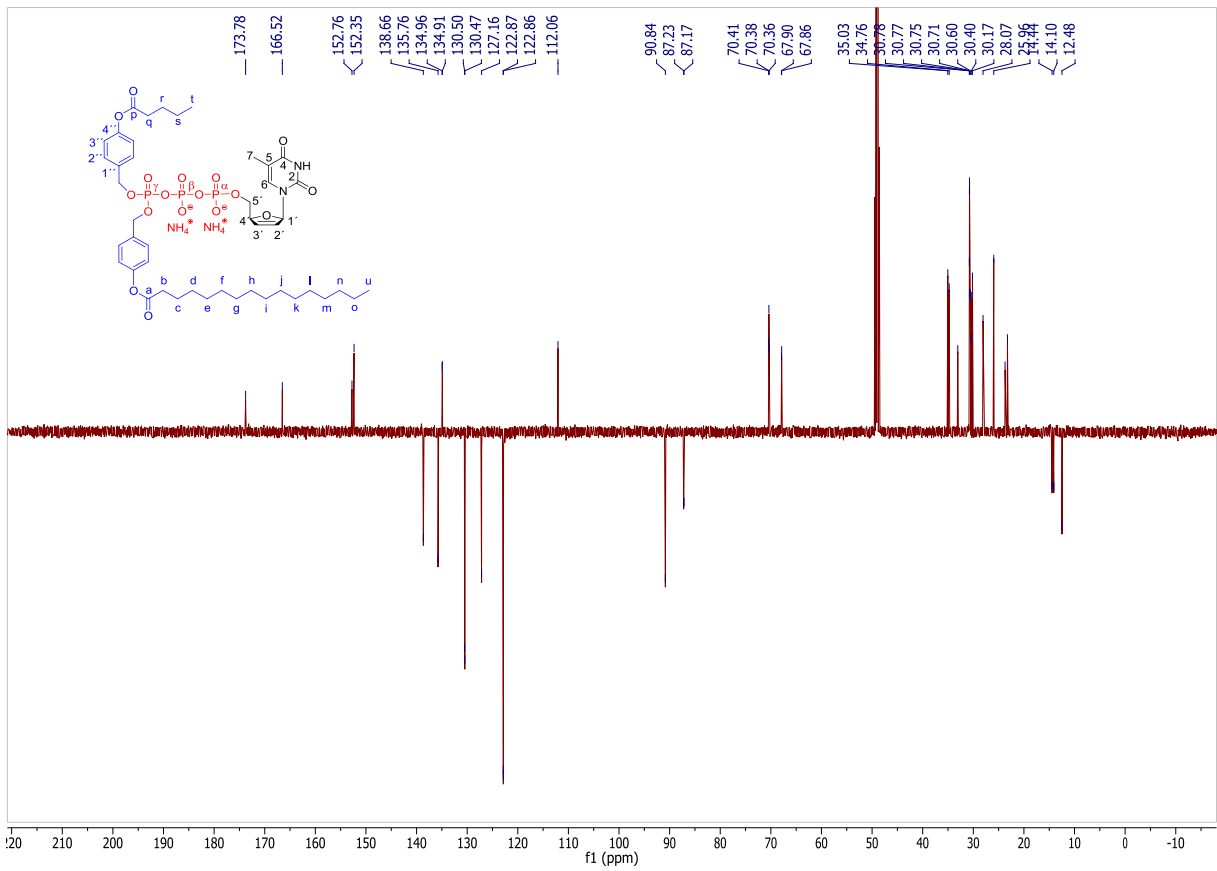

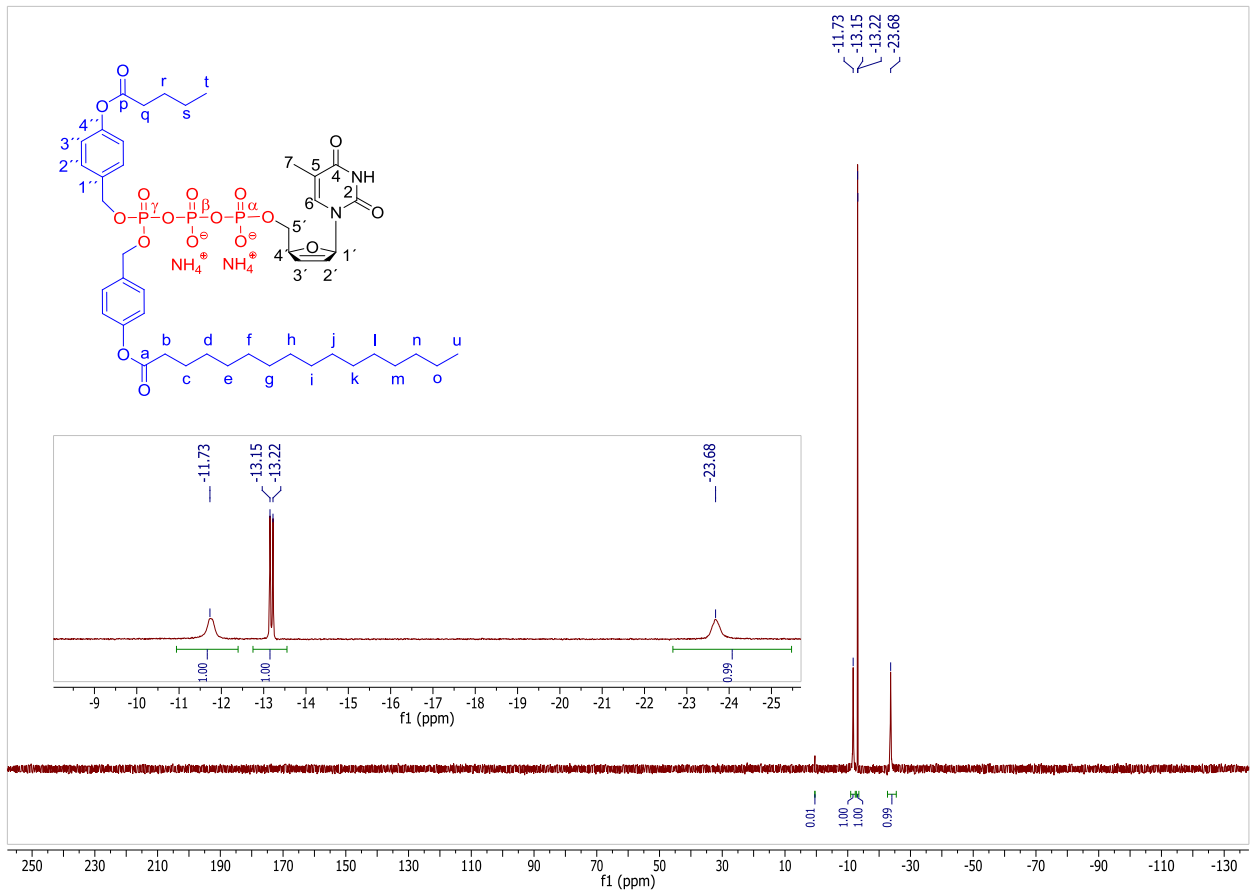

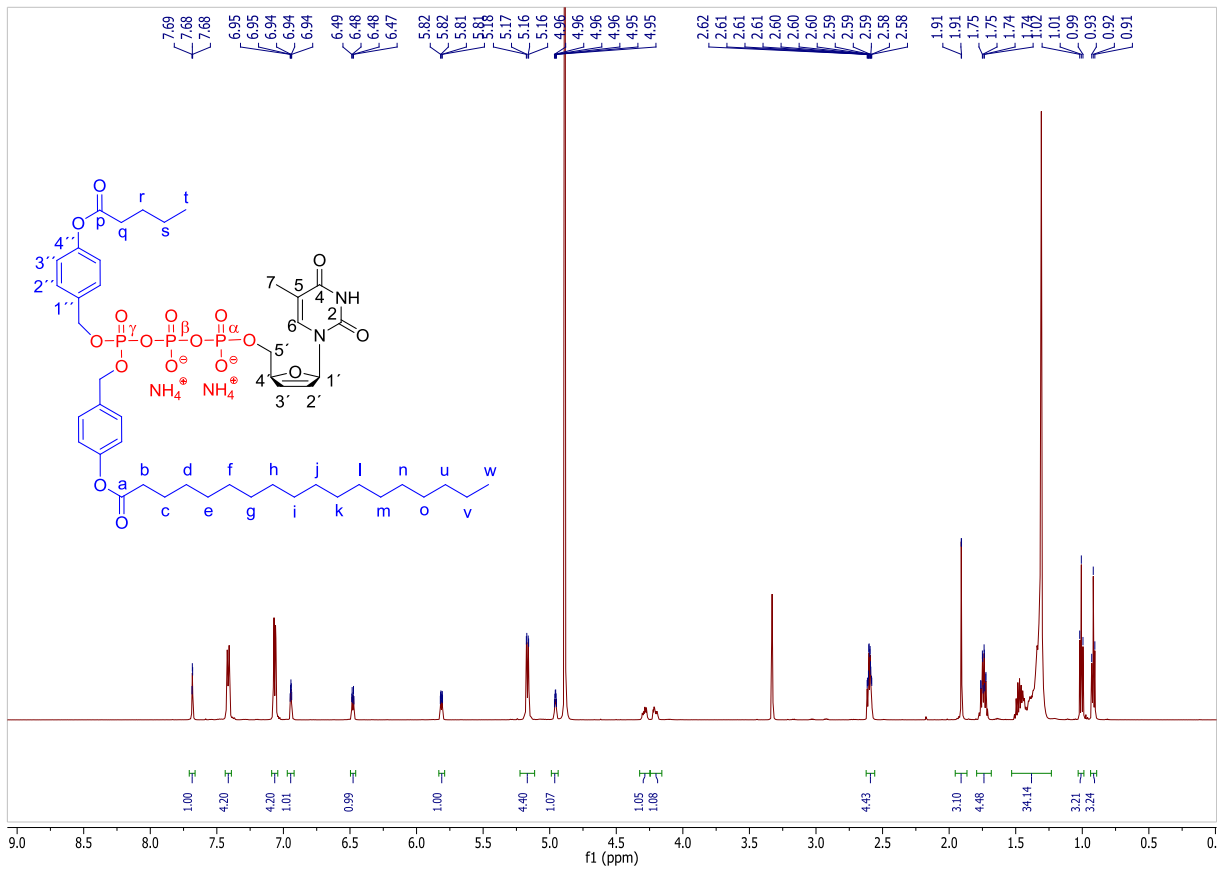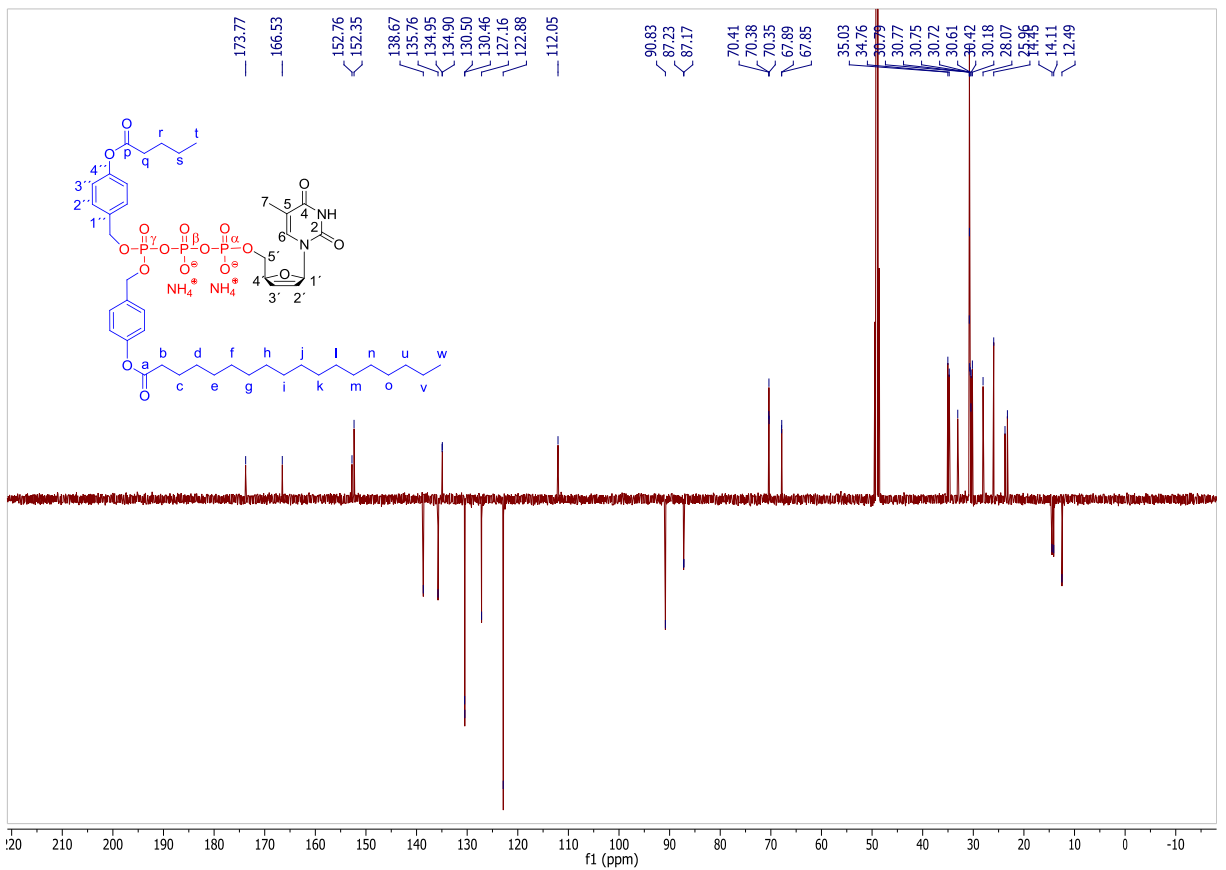

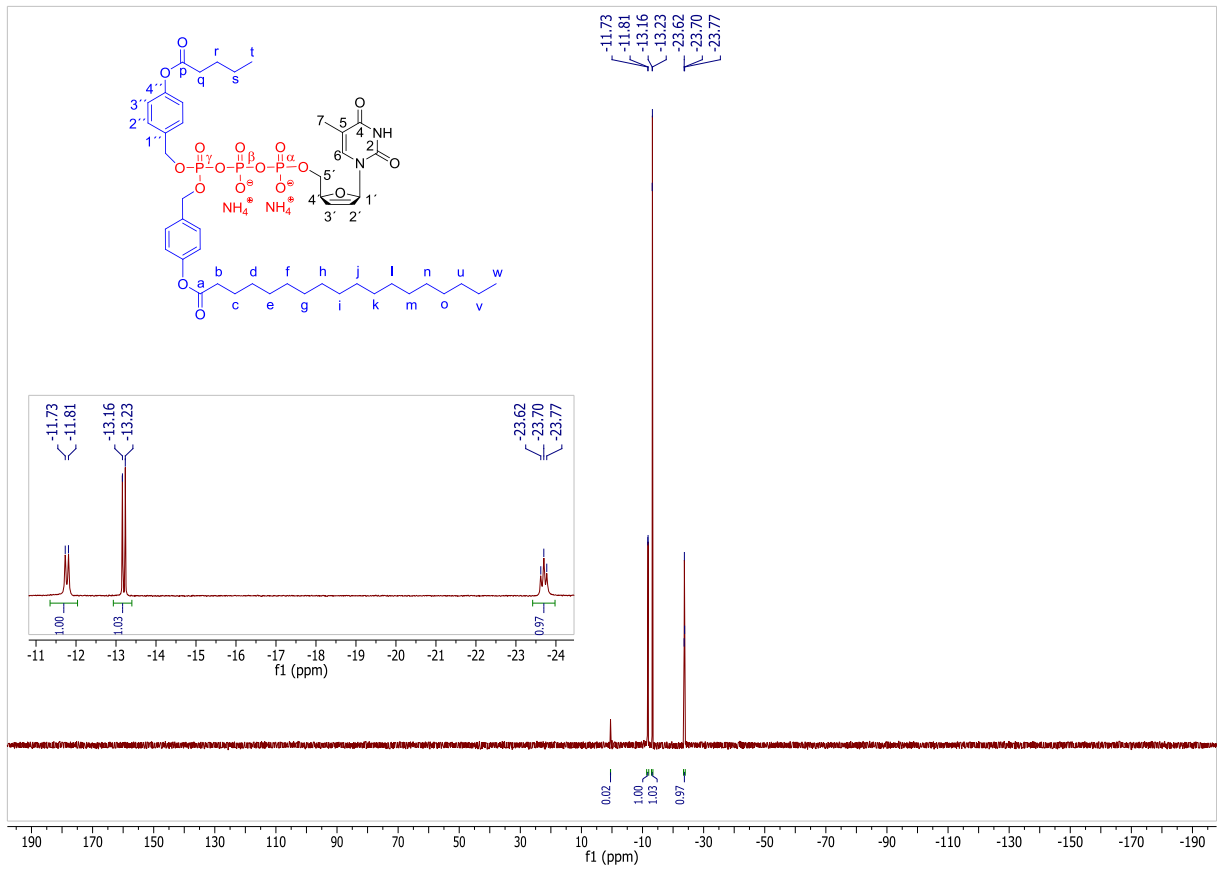

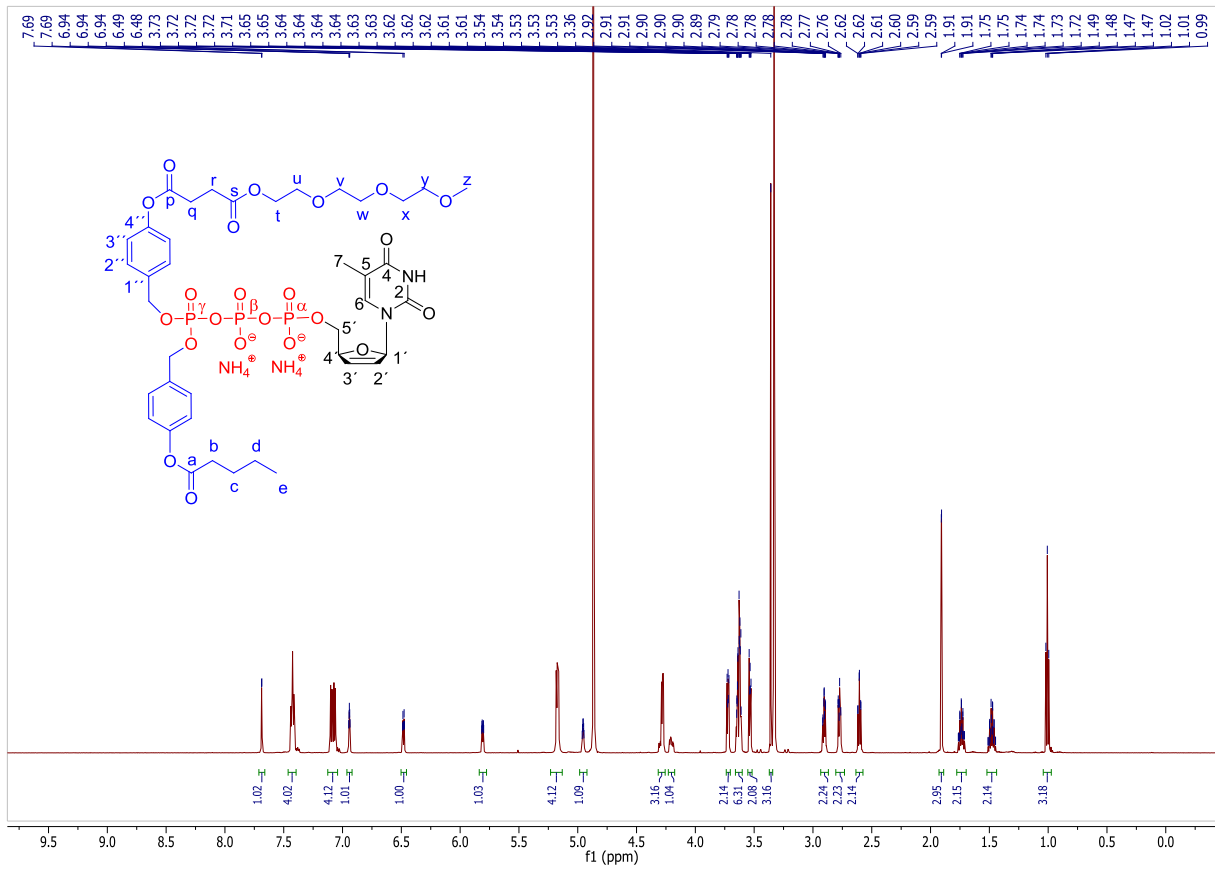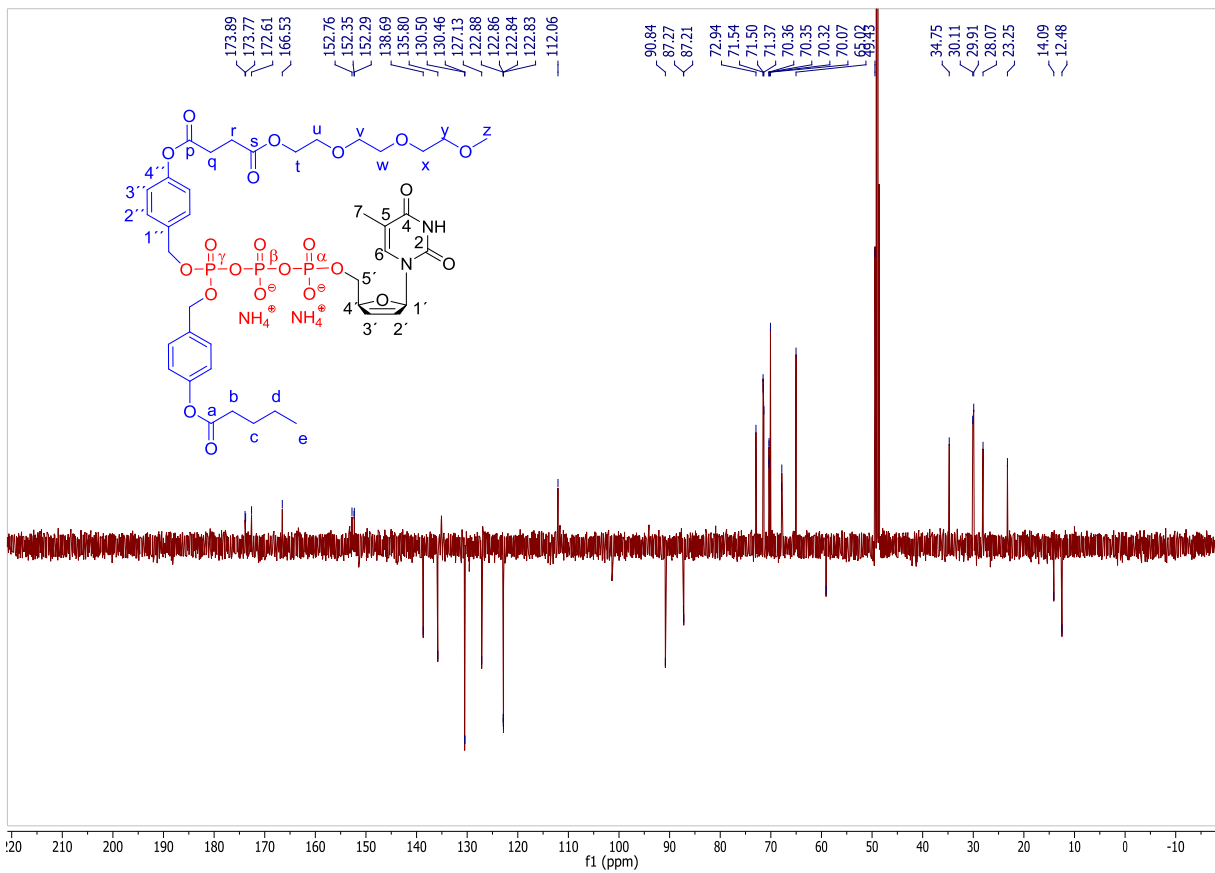

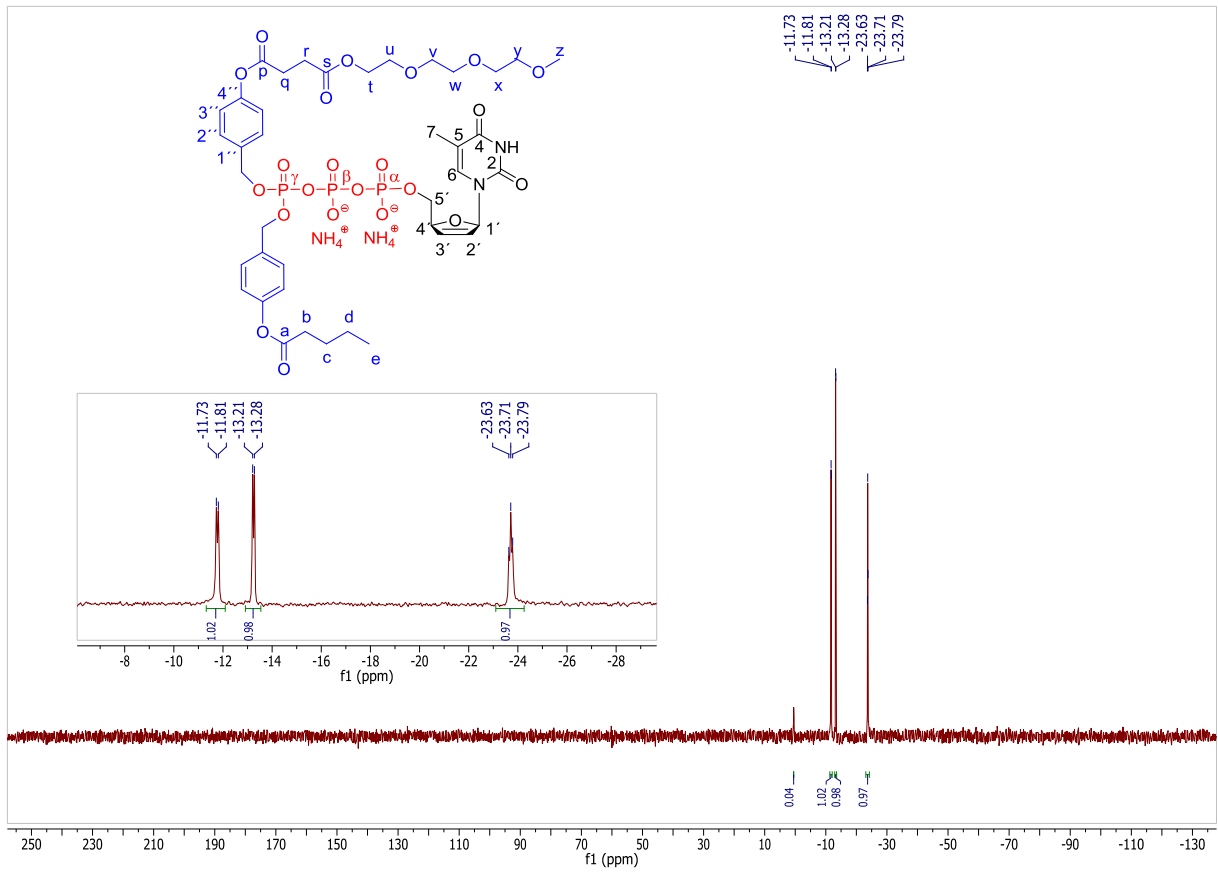

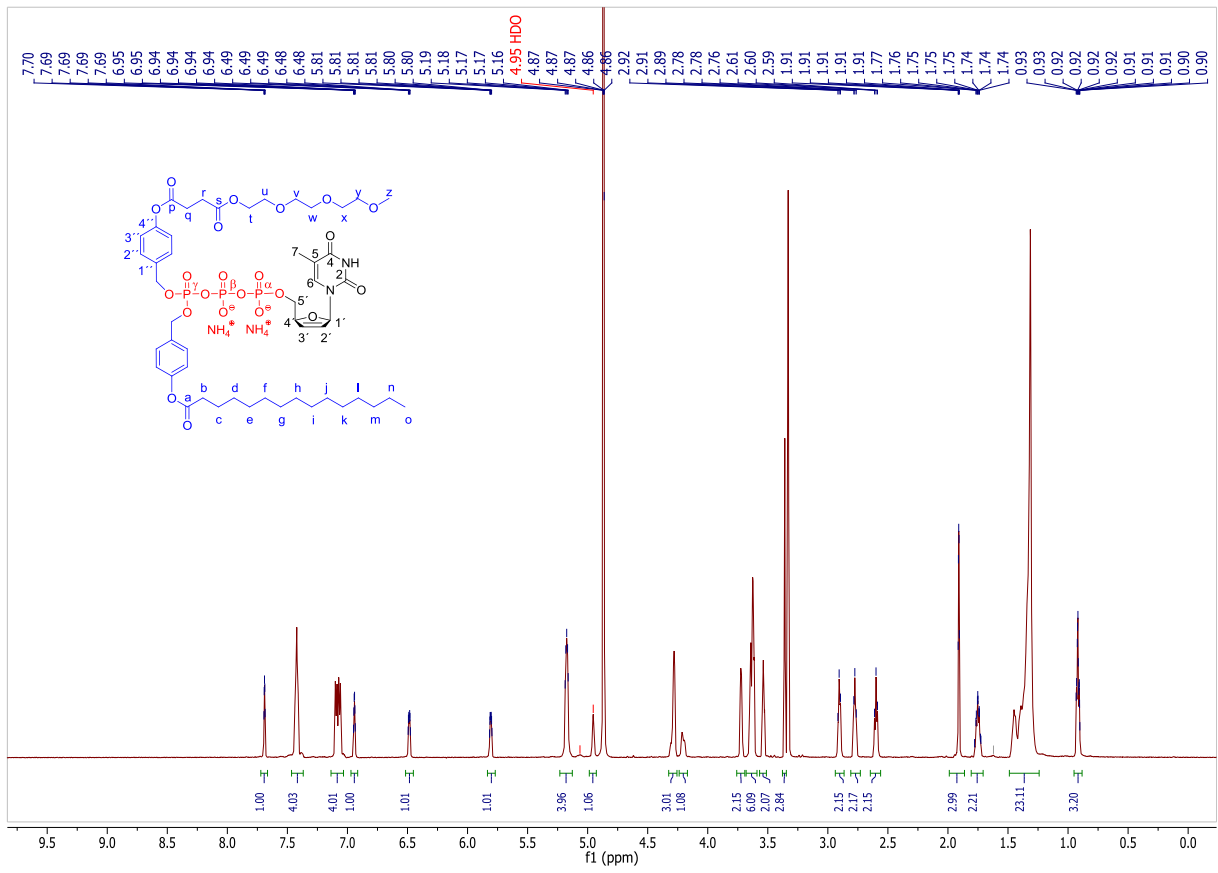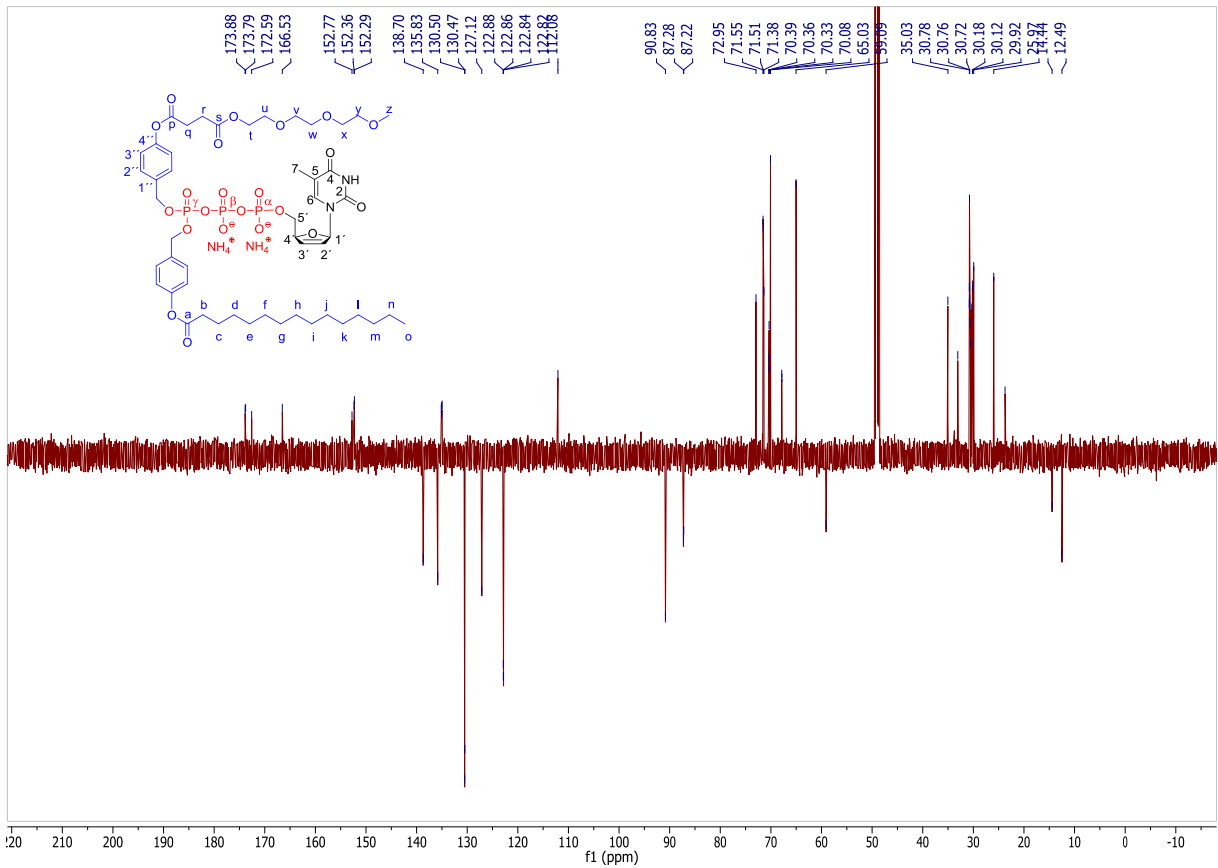

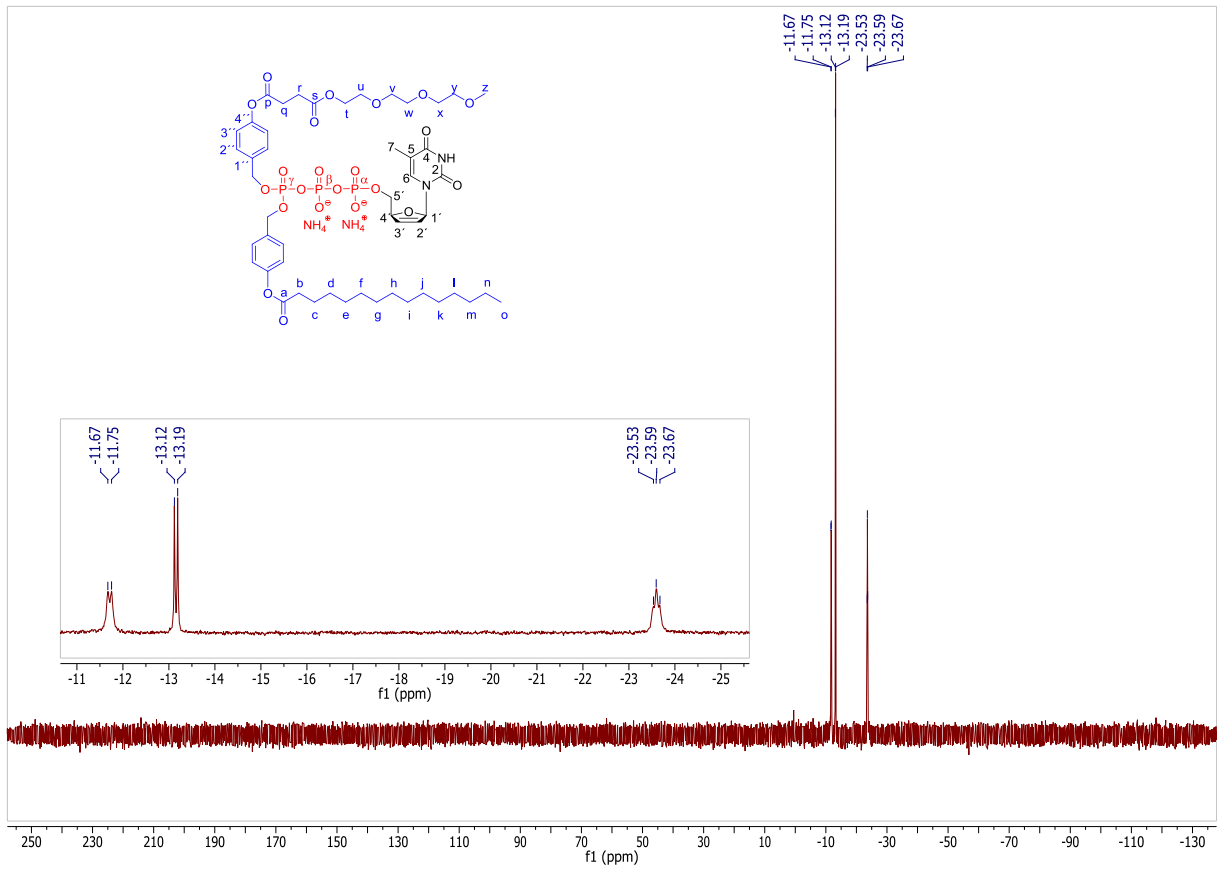



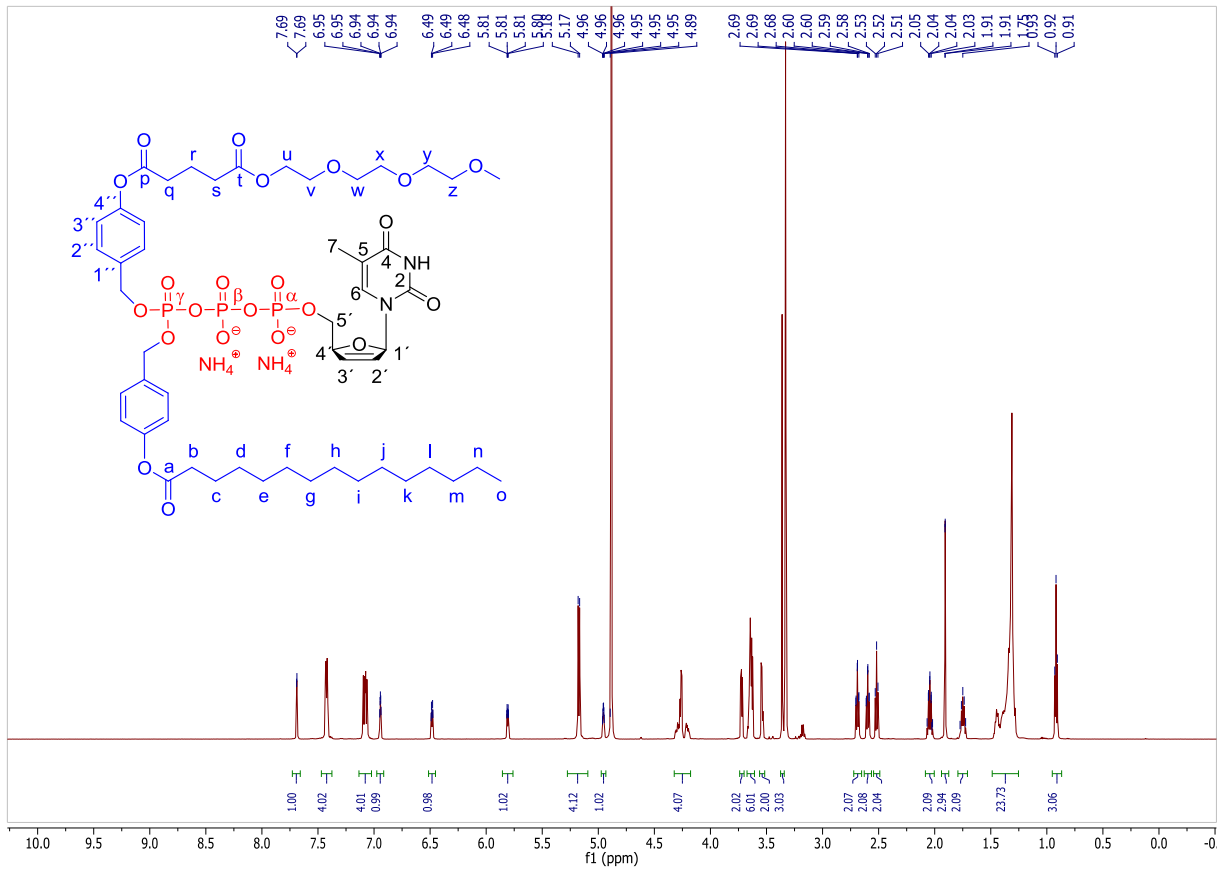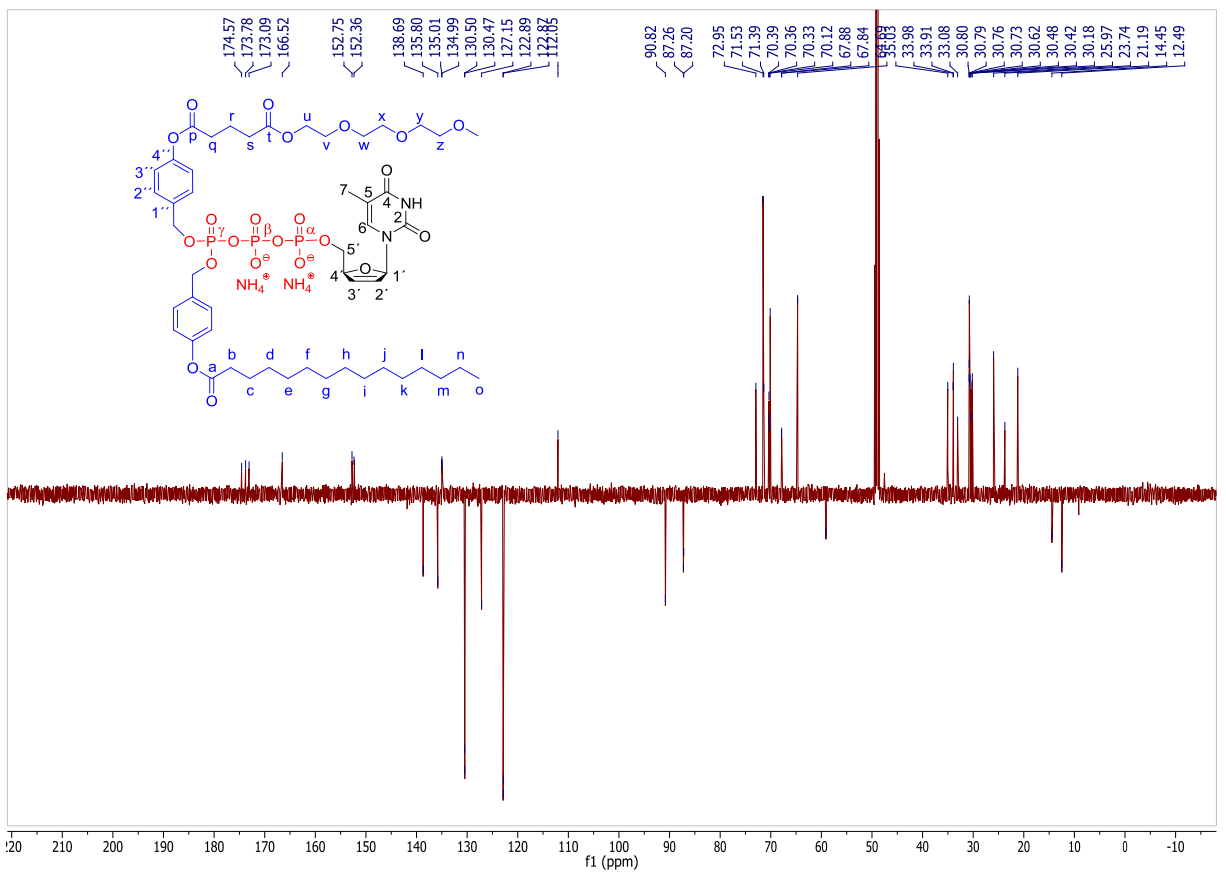

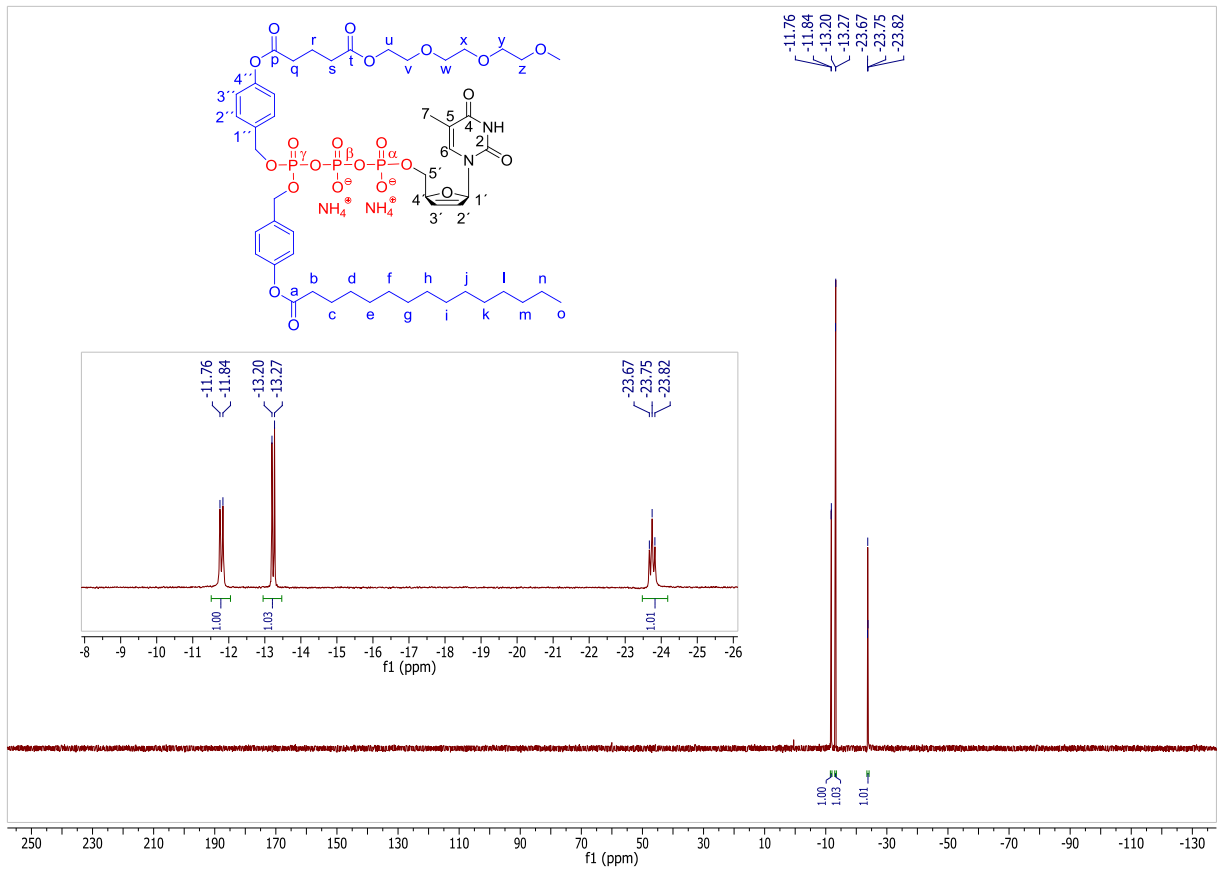

Supplement: CMDC-16-499-s001.pdf [file CMDC-16-499-s001.pdf]
